# Supplementary figures and images for: Novel two-dimensional silicon–carbon binaries by crystal structure prediction
Source: Royal Society of Chemistry journal article supplement (doi:10.1039/c9cp06942a), 2020-01-01

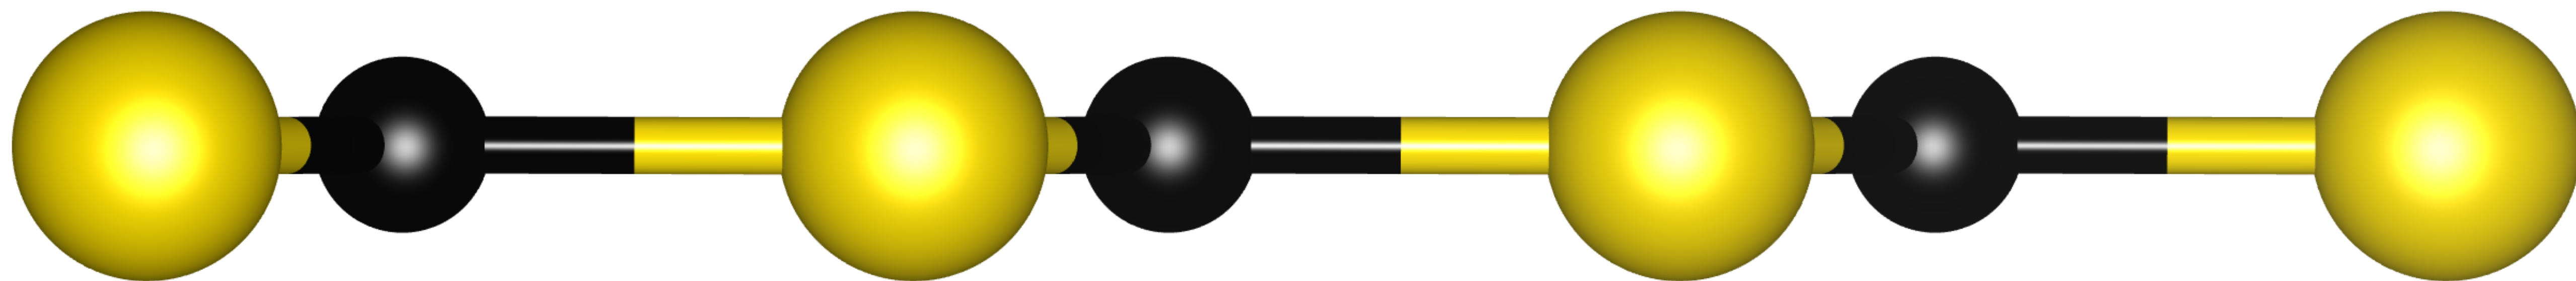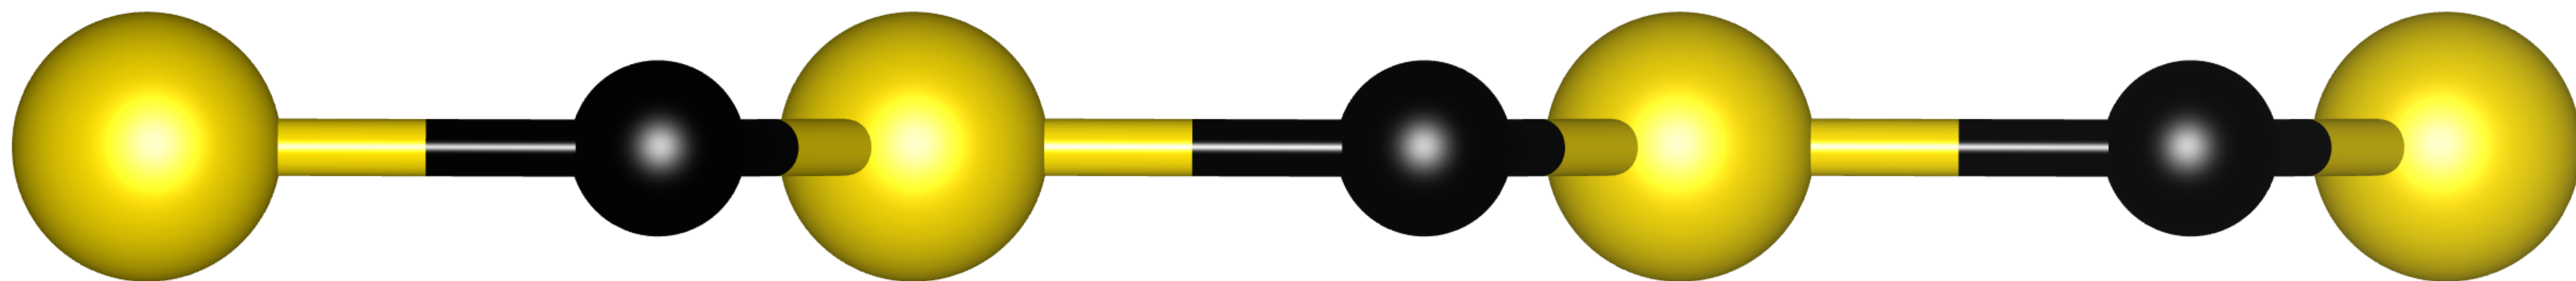

Supplement: c9cp06942a1.zip [file c9cp06942a1.zip]

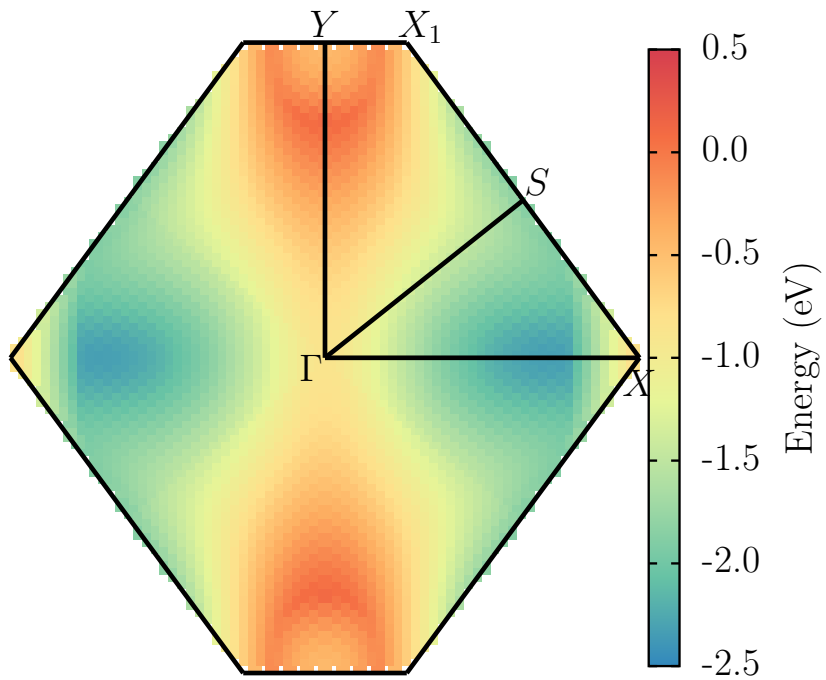

Supplement: c9cp06942a1.zip [file c9cp06942a1.zip]

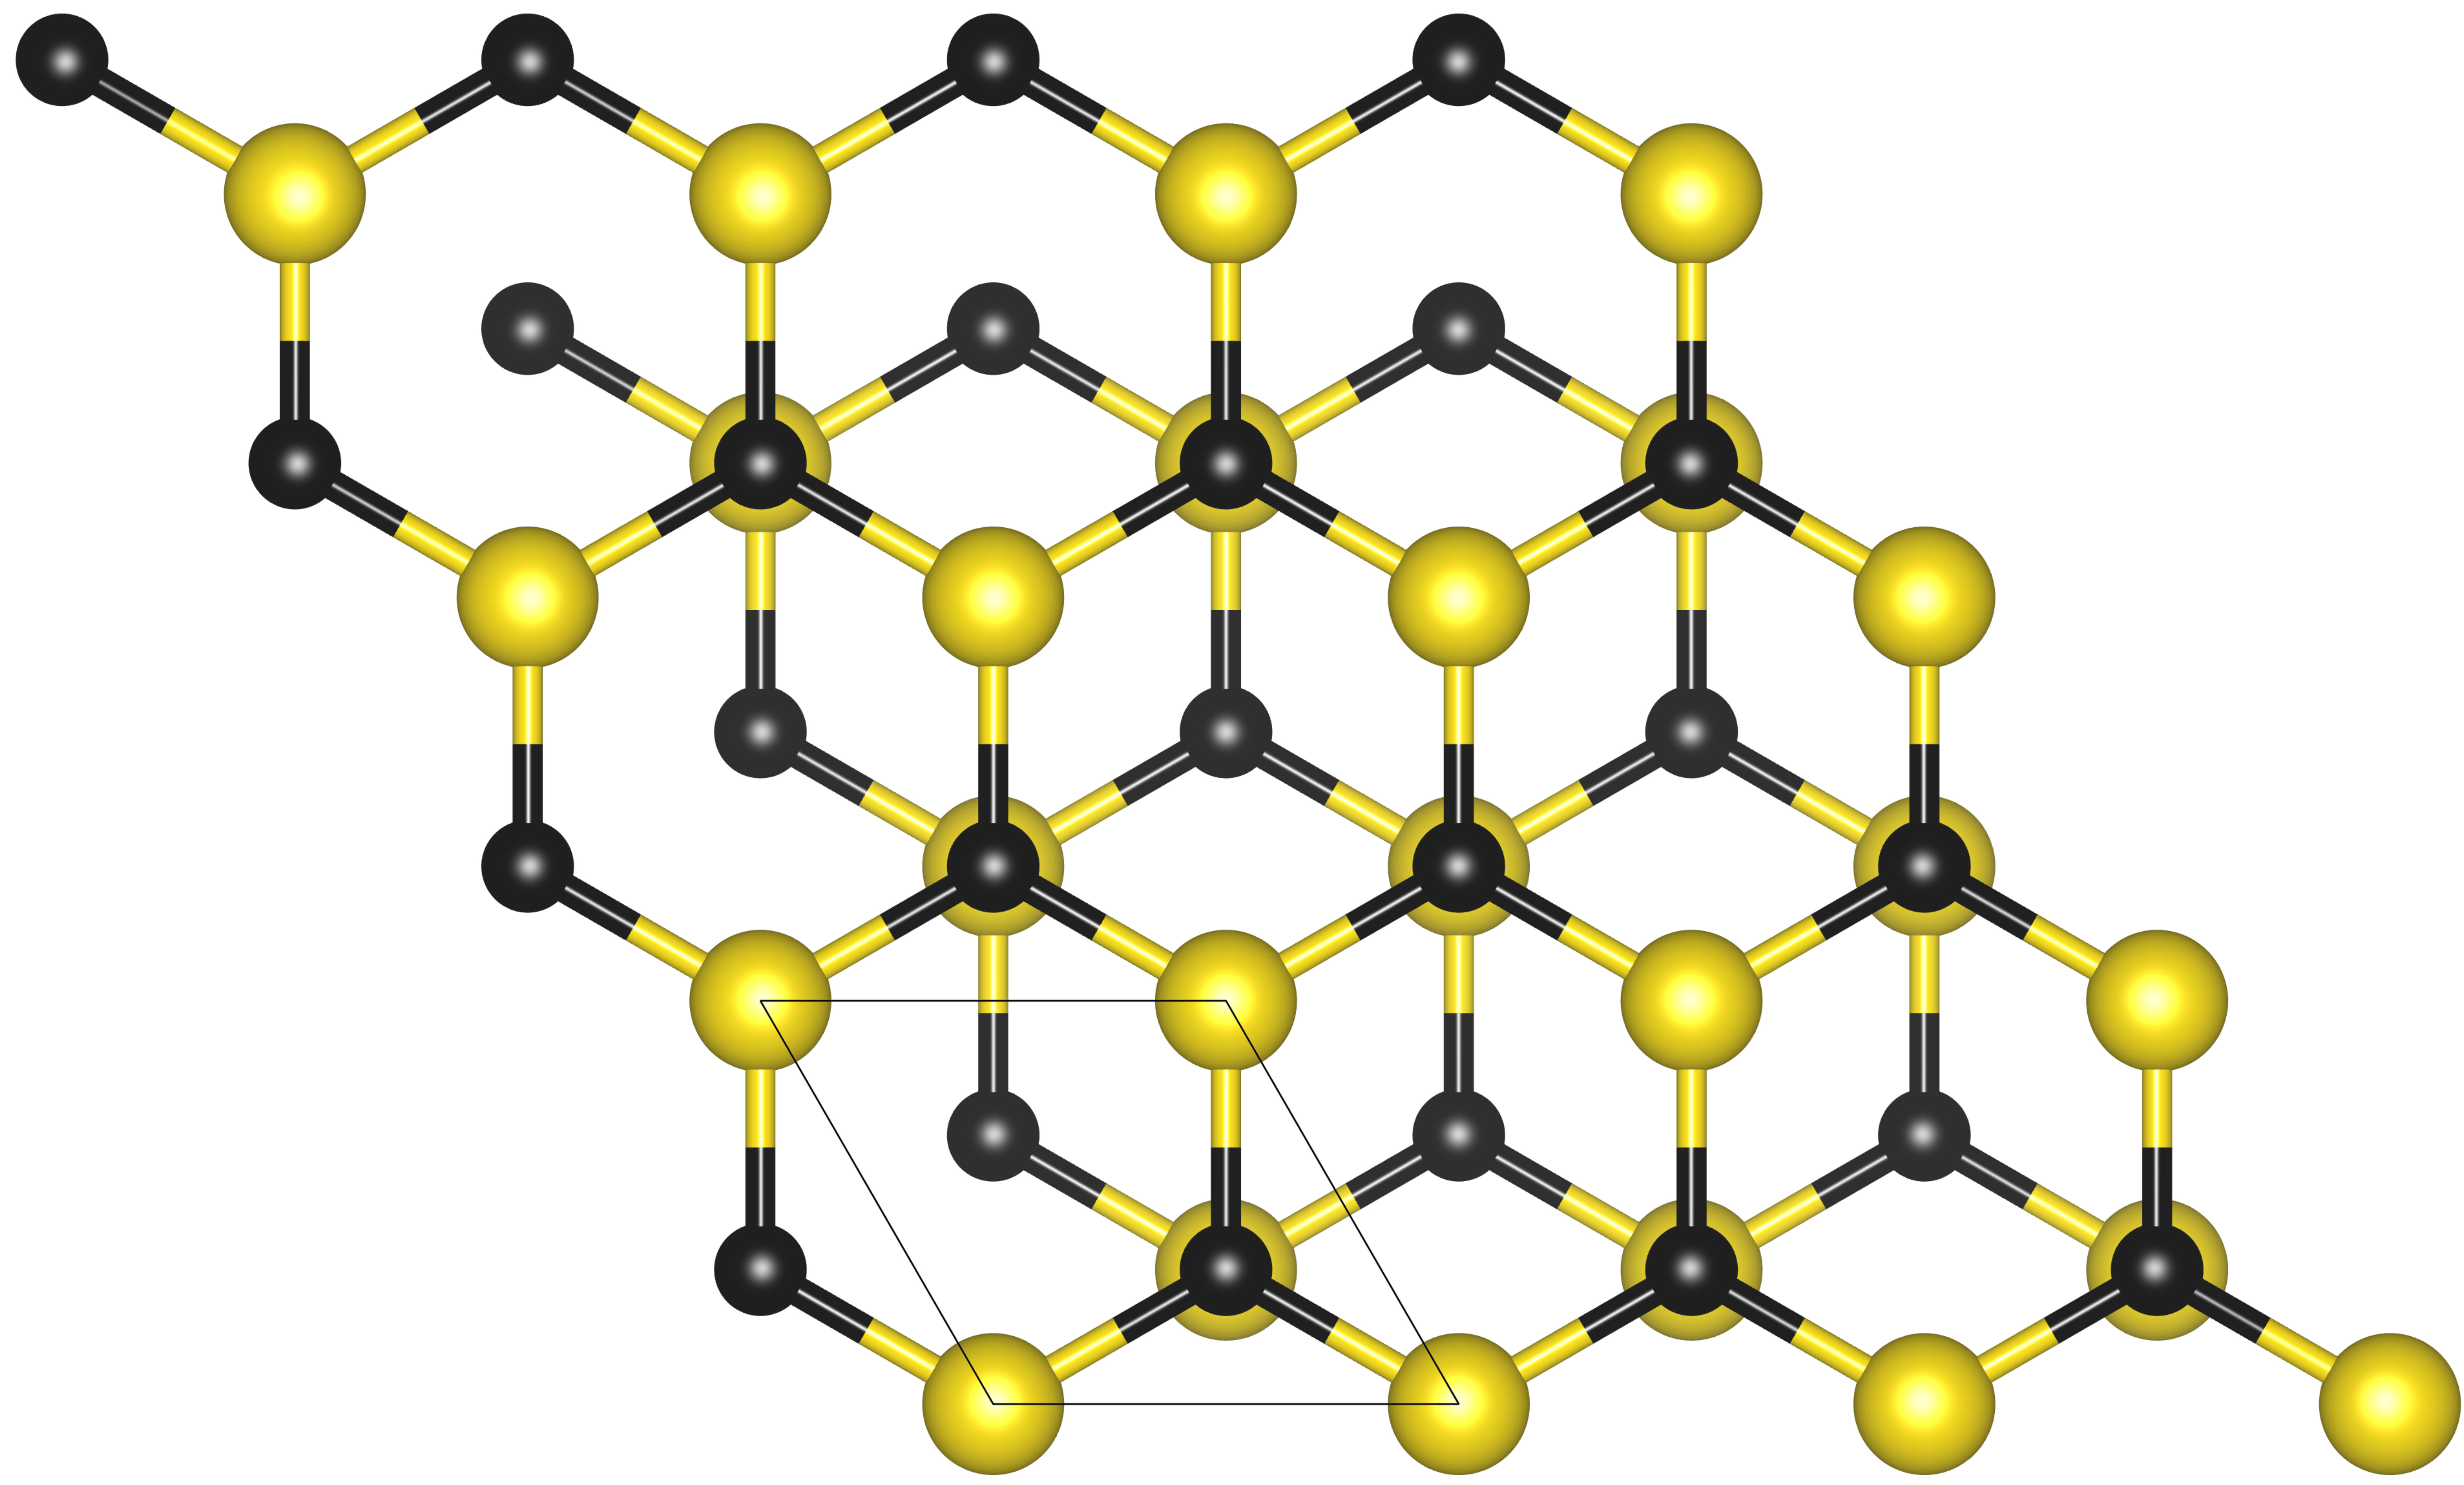

Supplement: c9cp06942a1.zip [file c9cp06942a1.zip]

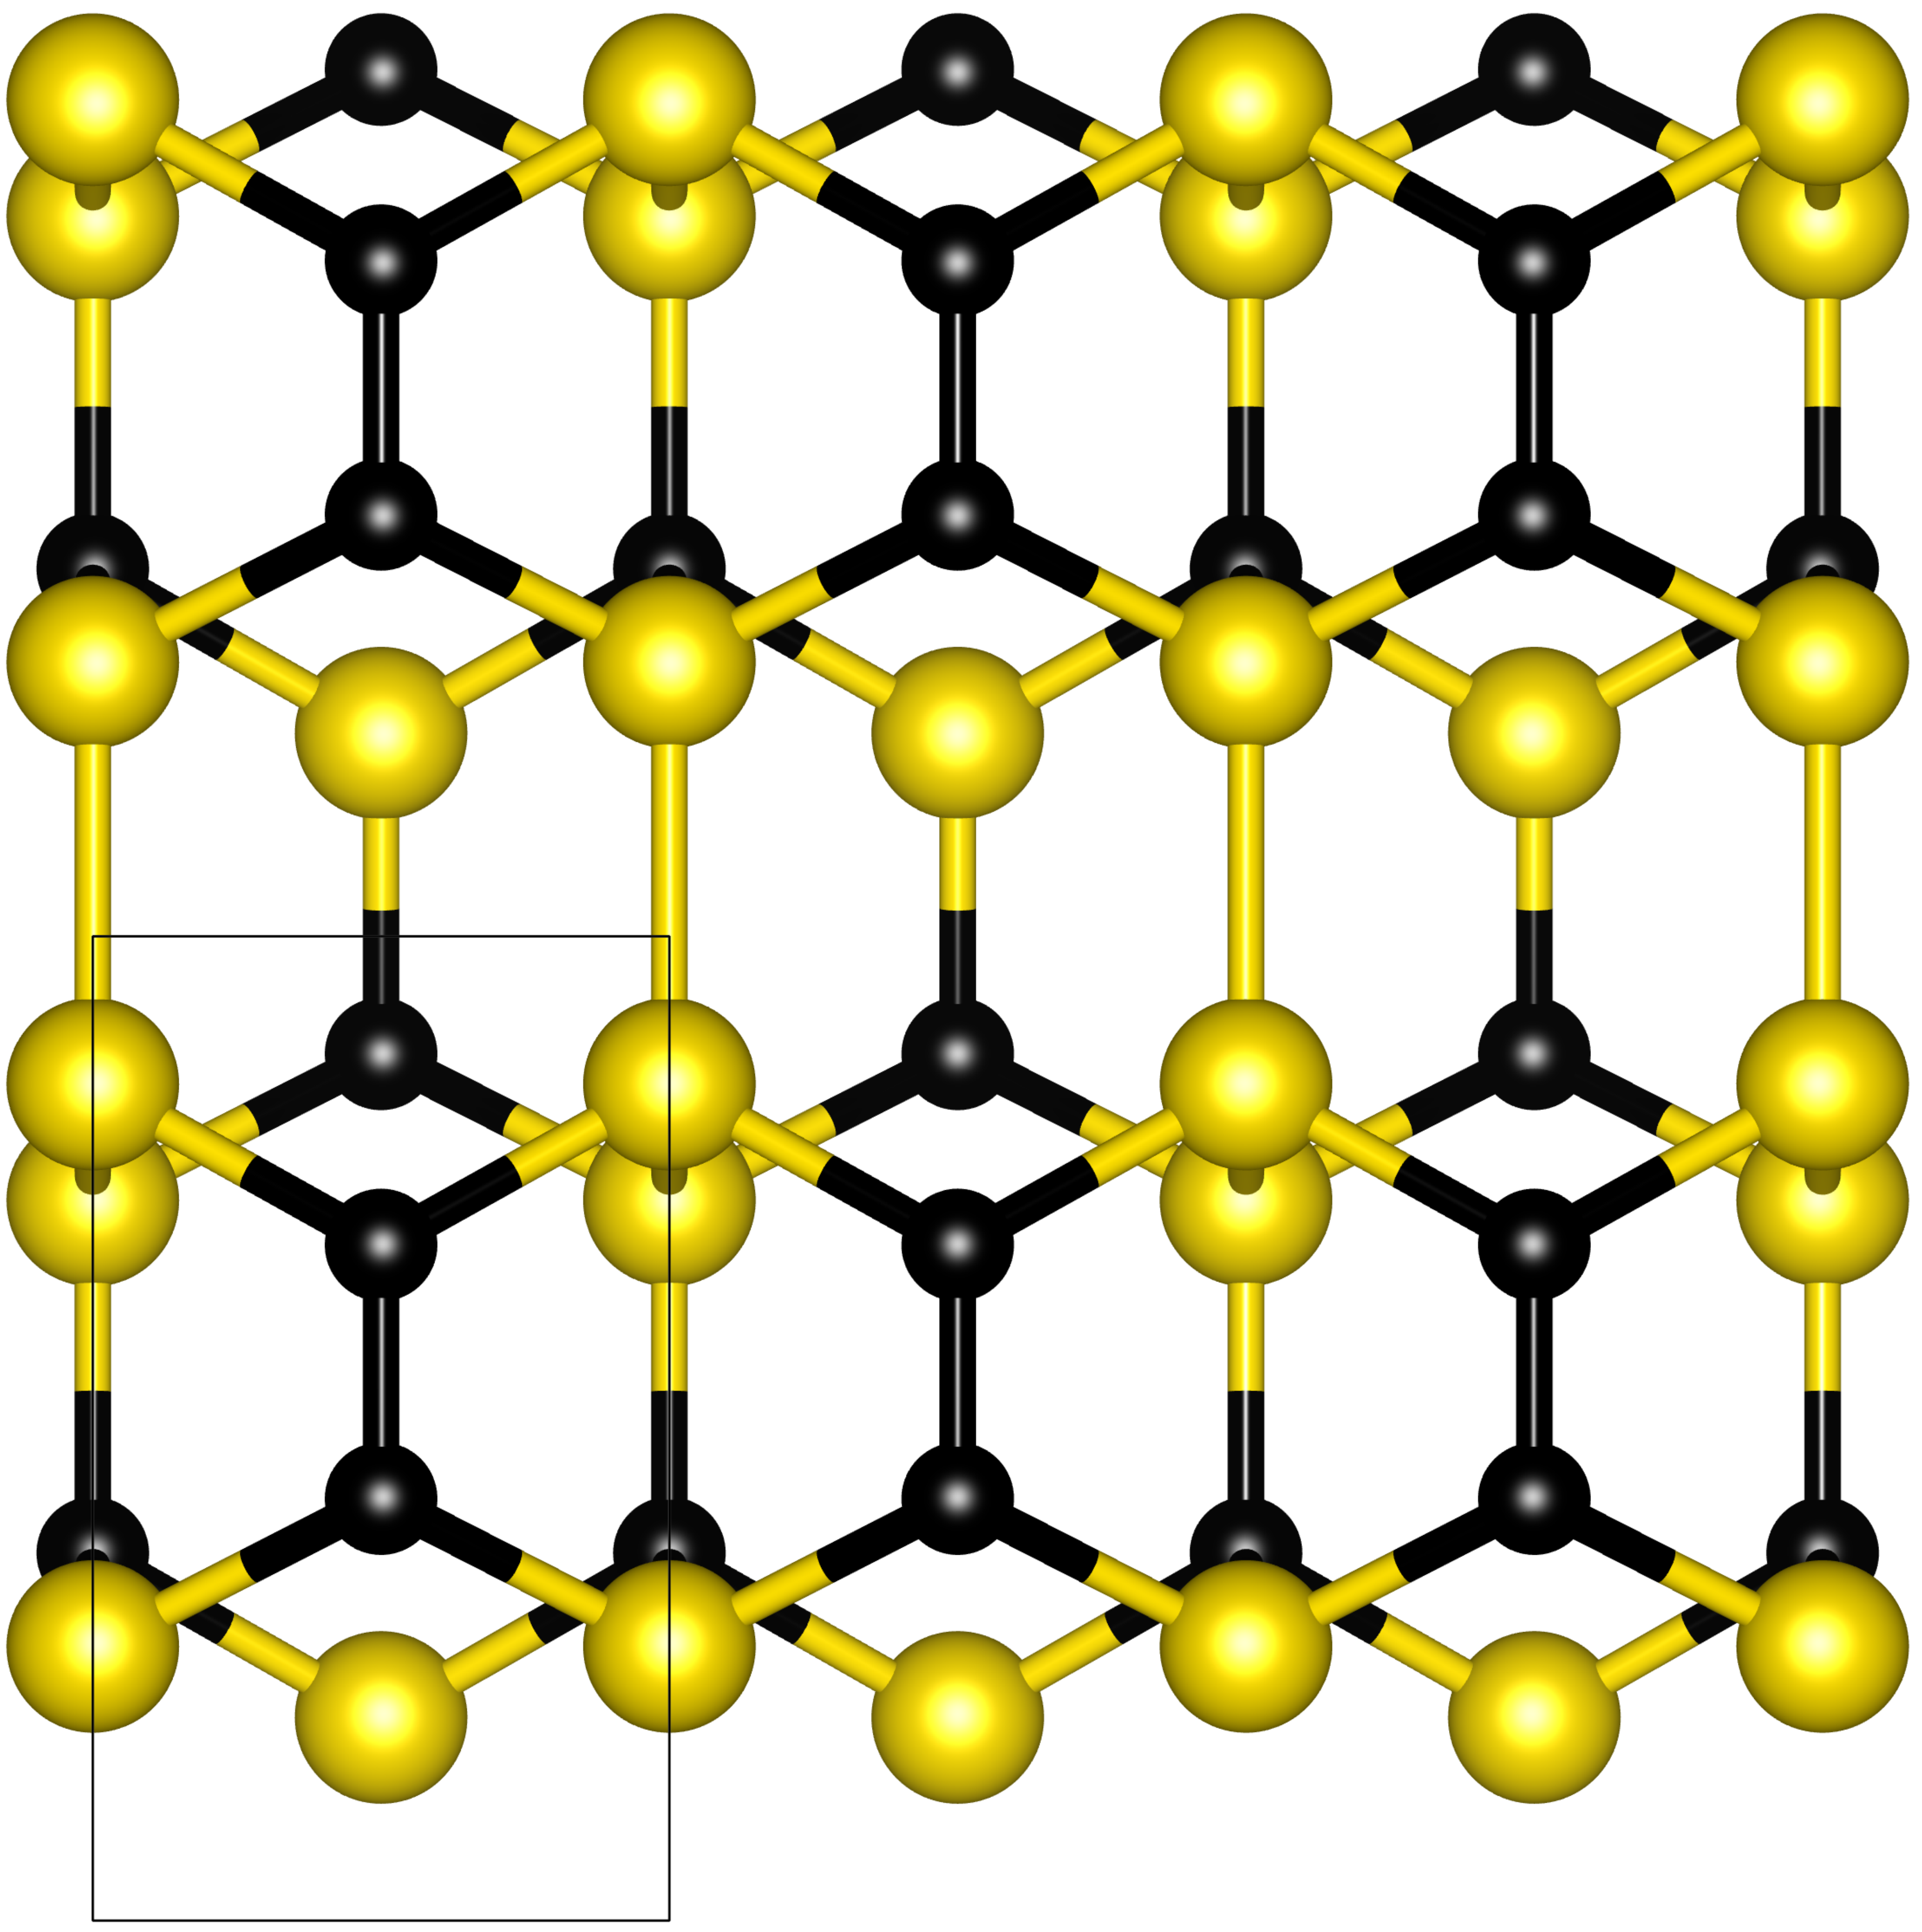

Supplement: c9cp06942a1.zip [file c9cp06942a1.zip]

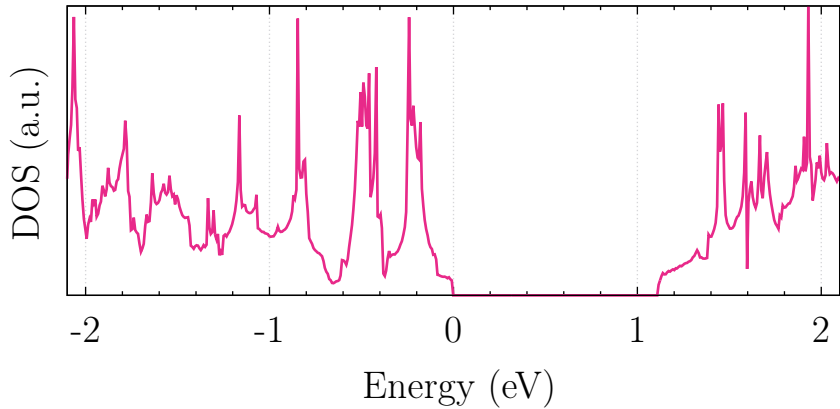

Supplement: c9cp06942a1.zip [file c9cp06942a1.zip]

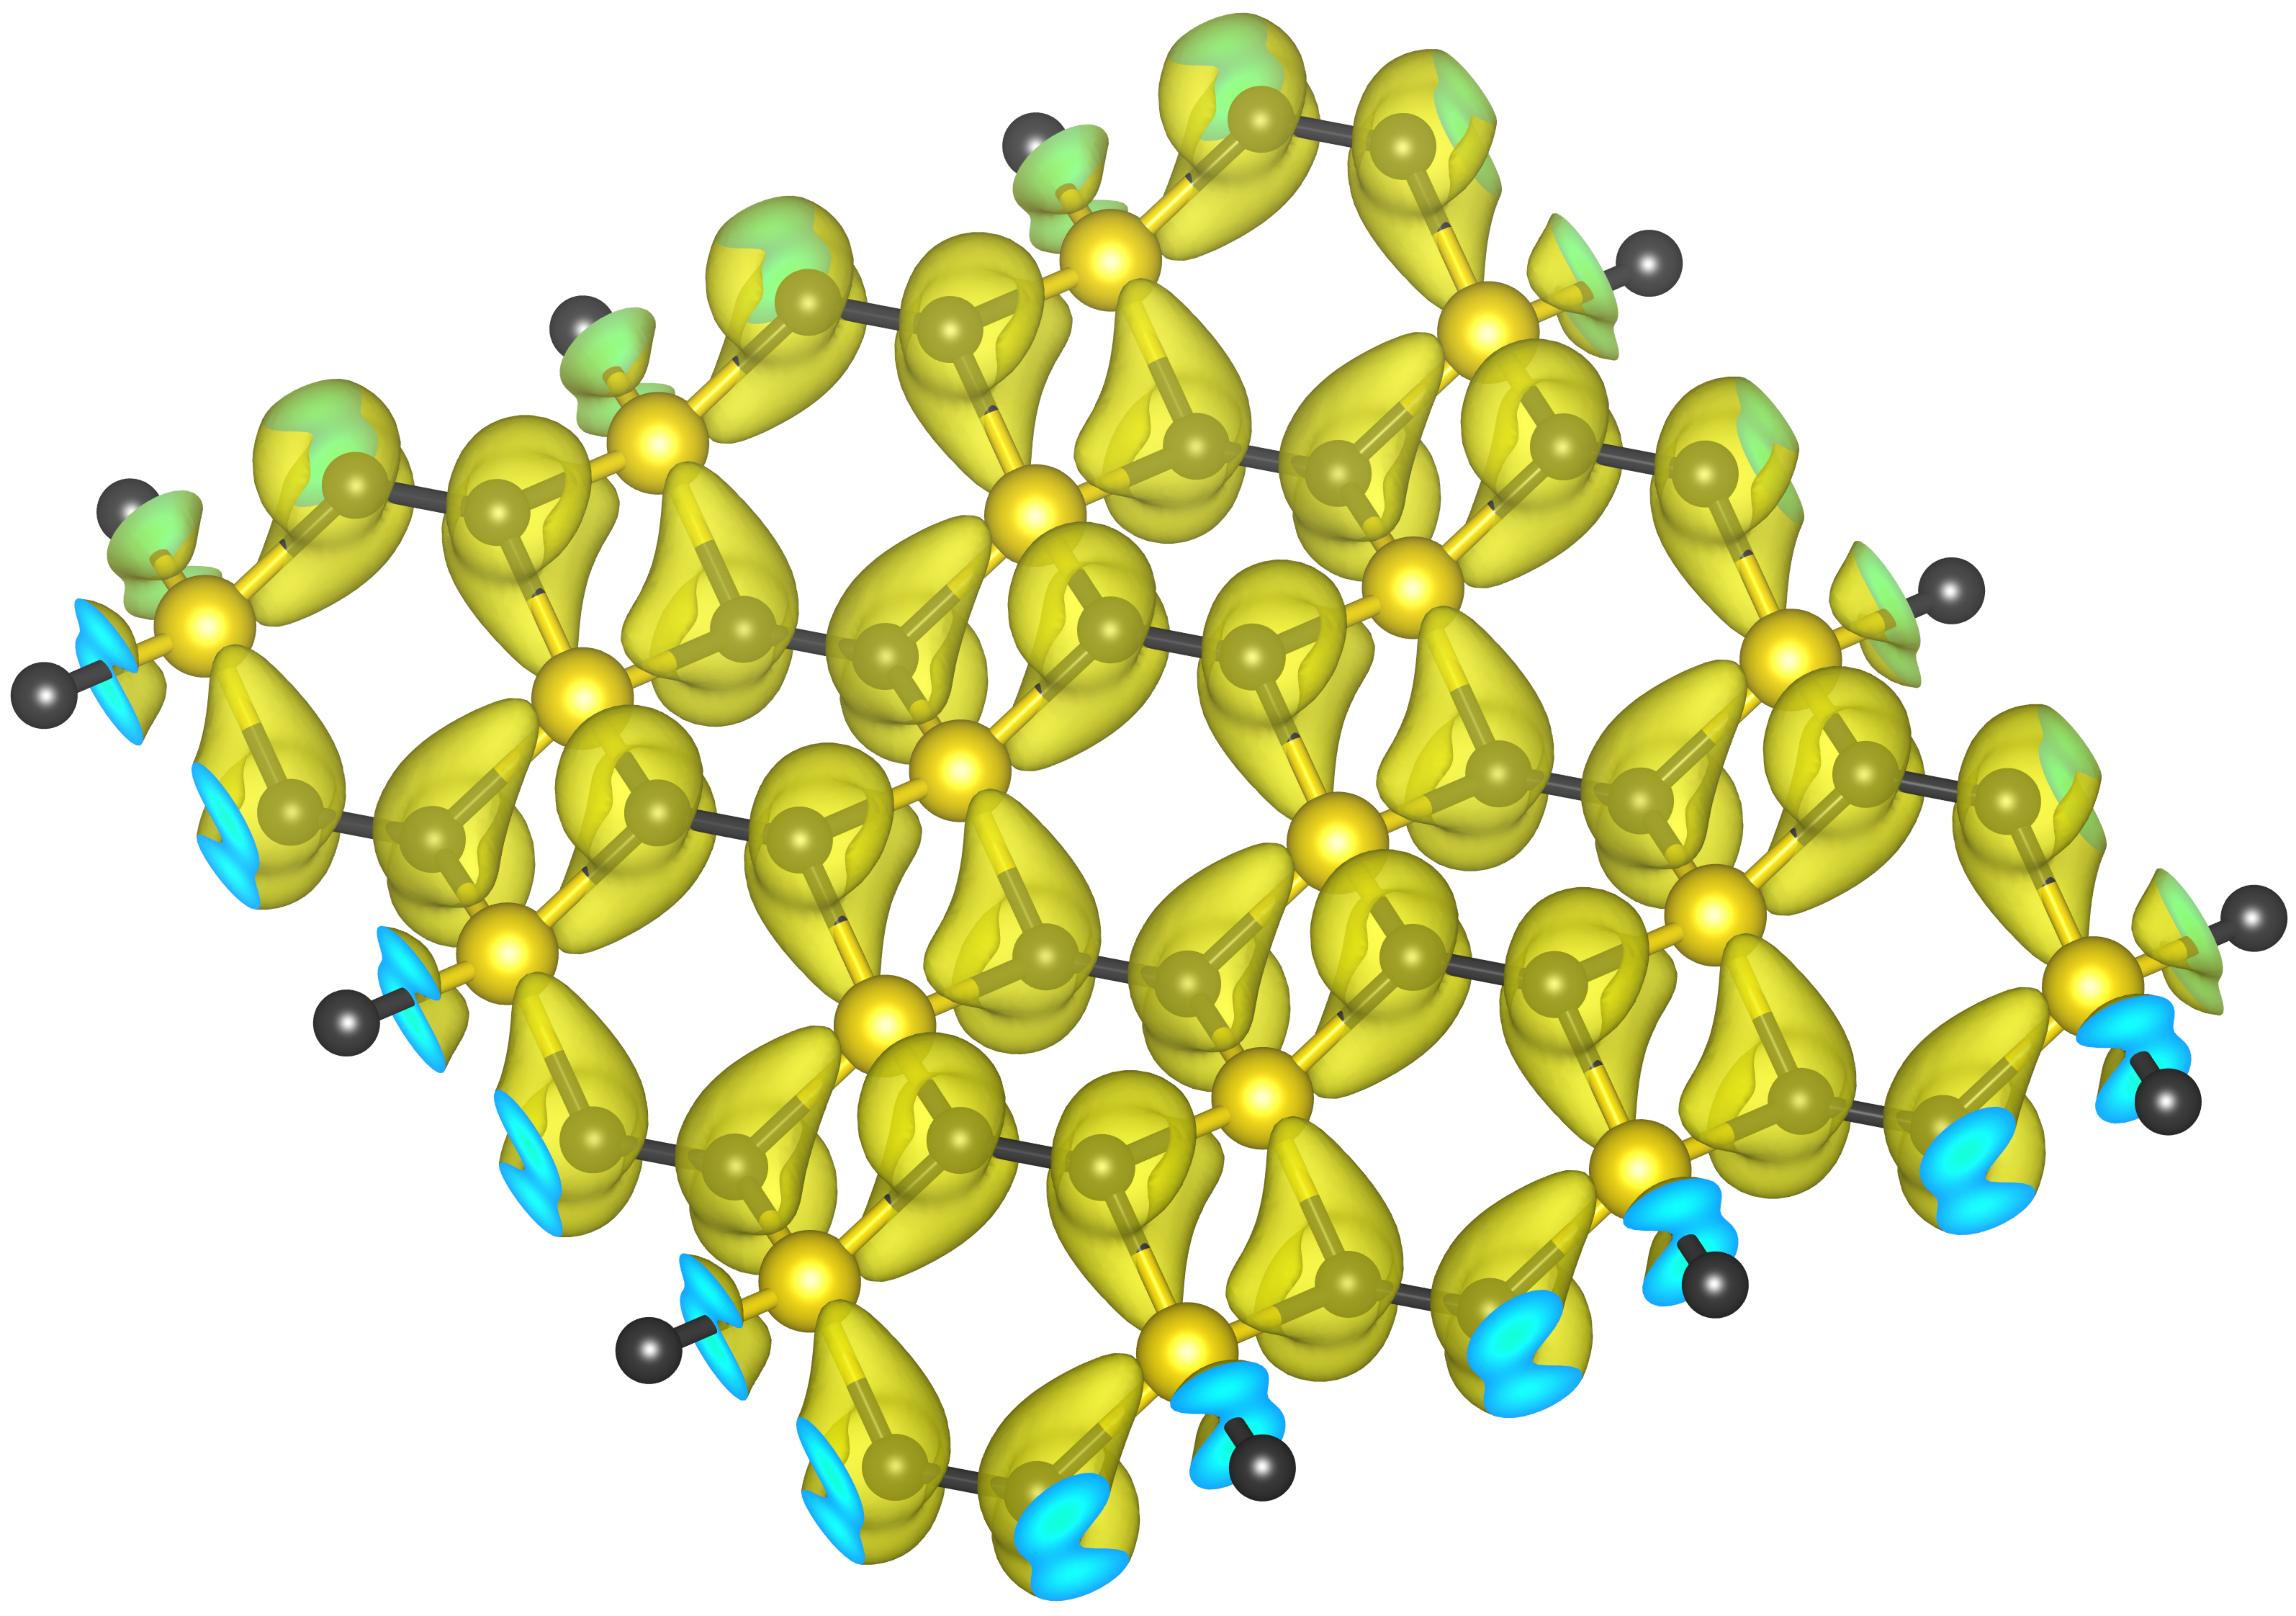

Supplement: c9cp06942a1.zip [file c9cp06942a1.zip]

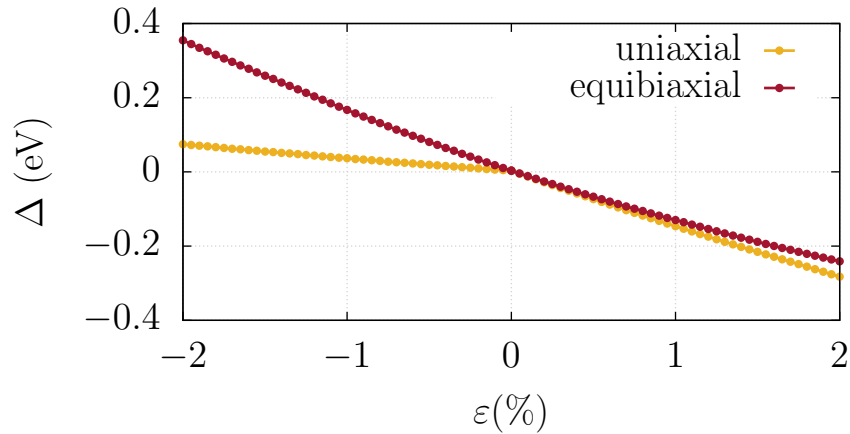

Supplement: c9cp06942a1.zip [file c9cp06942a1.zip]

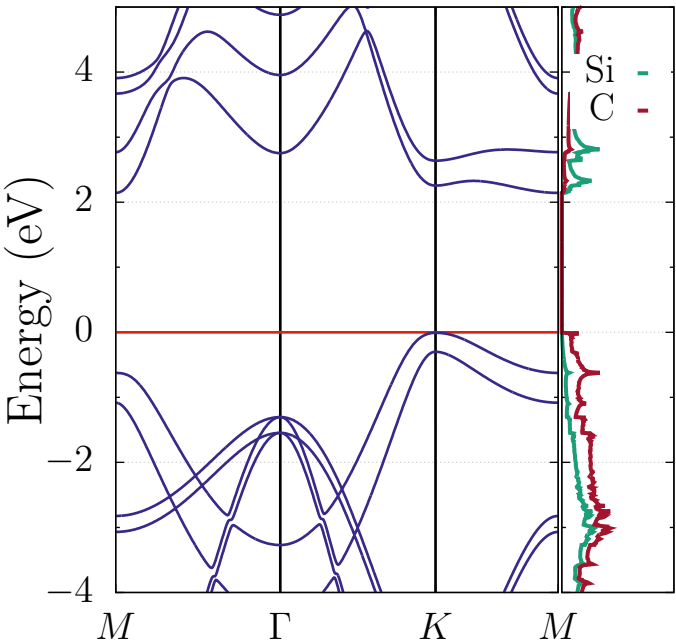

Supplement: c9cp06942a1.zip [file c9cp06942a1.zip]

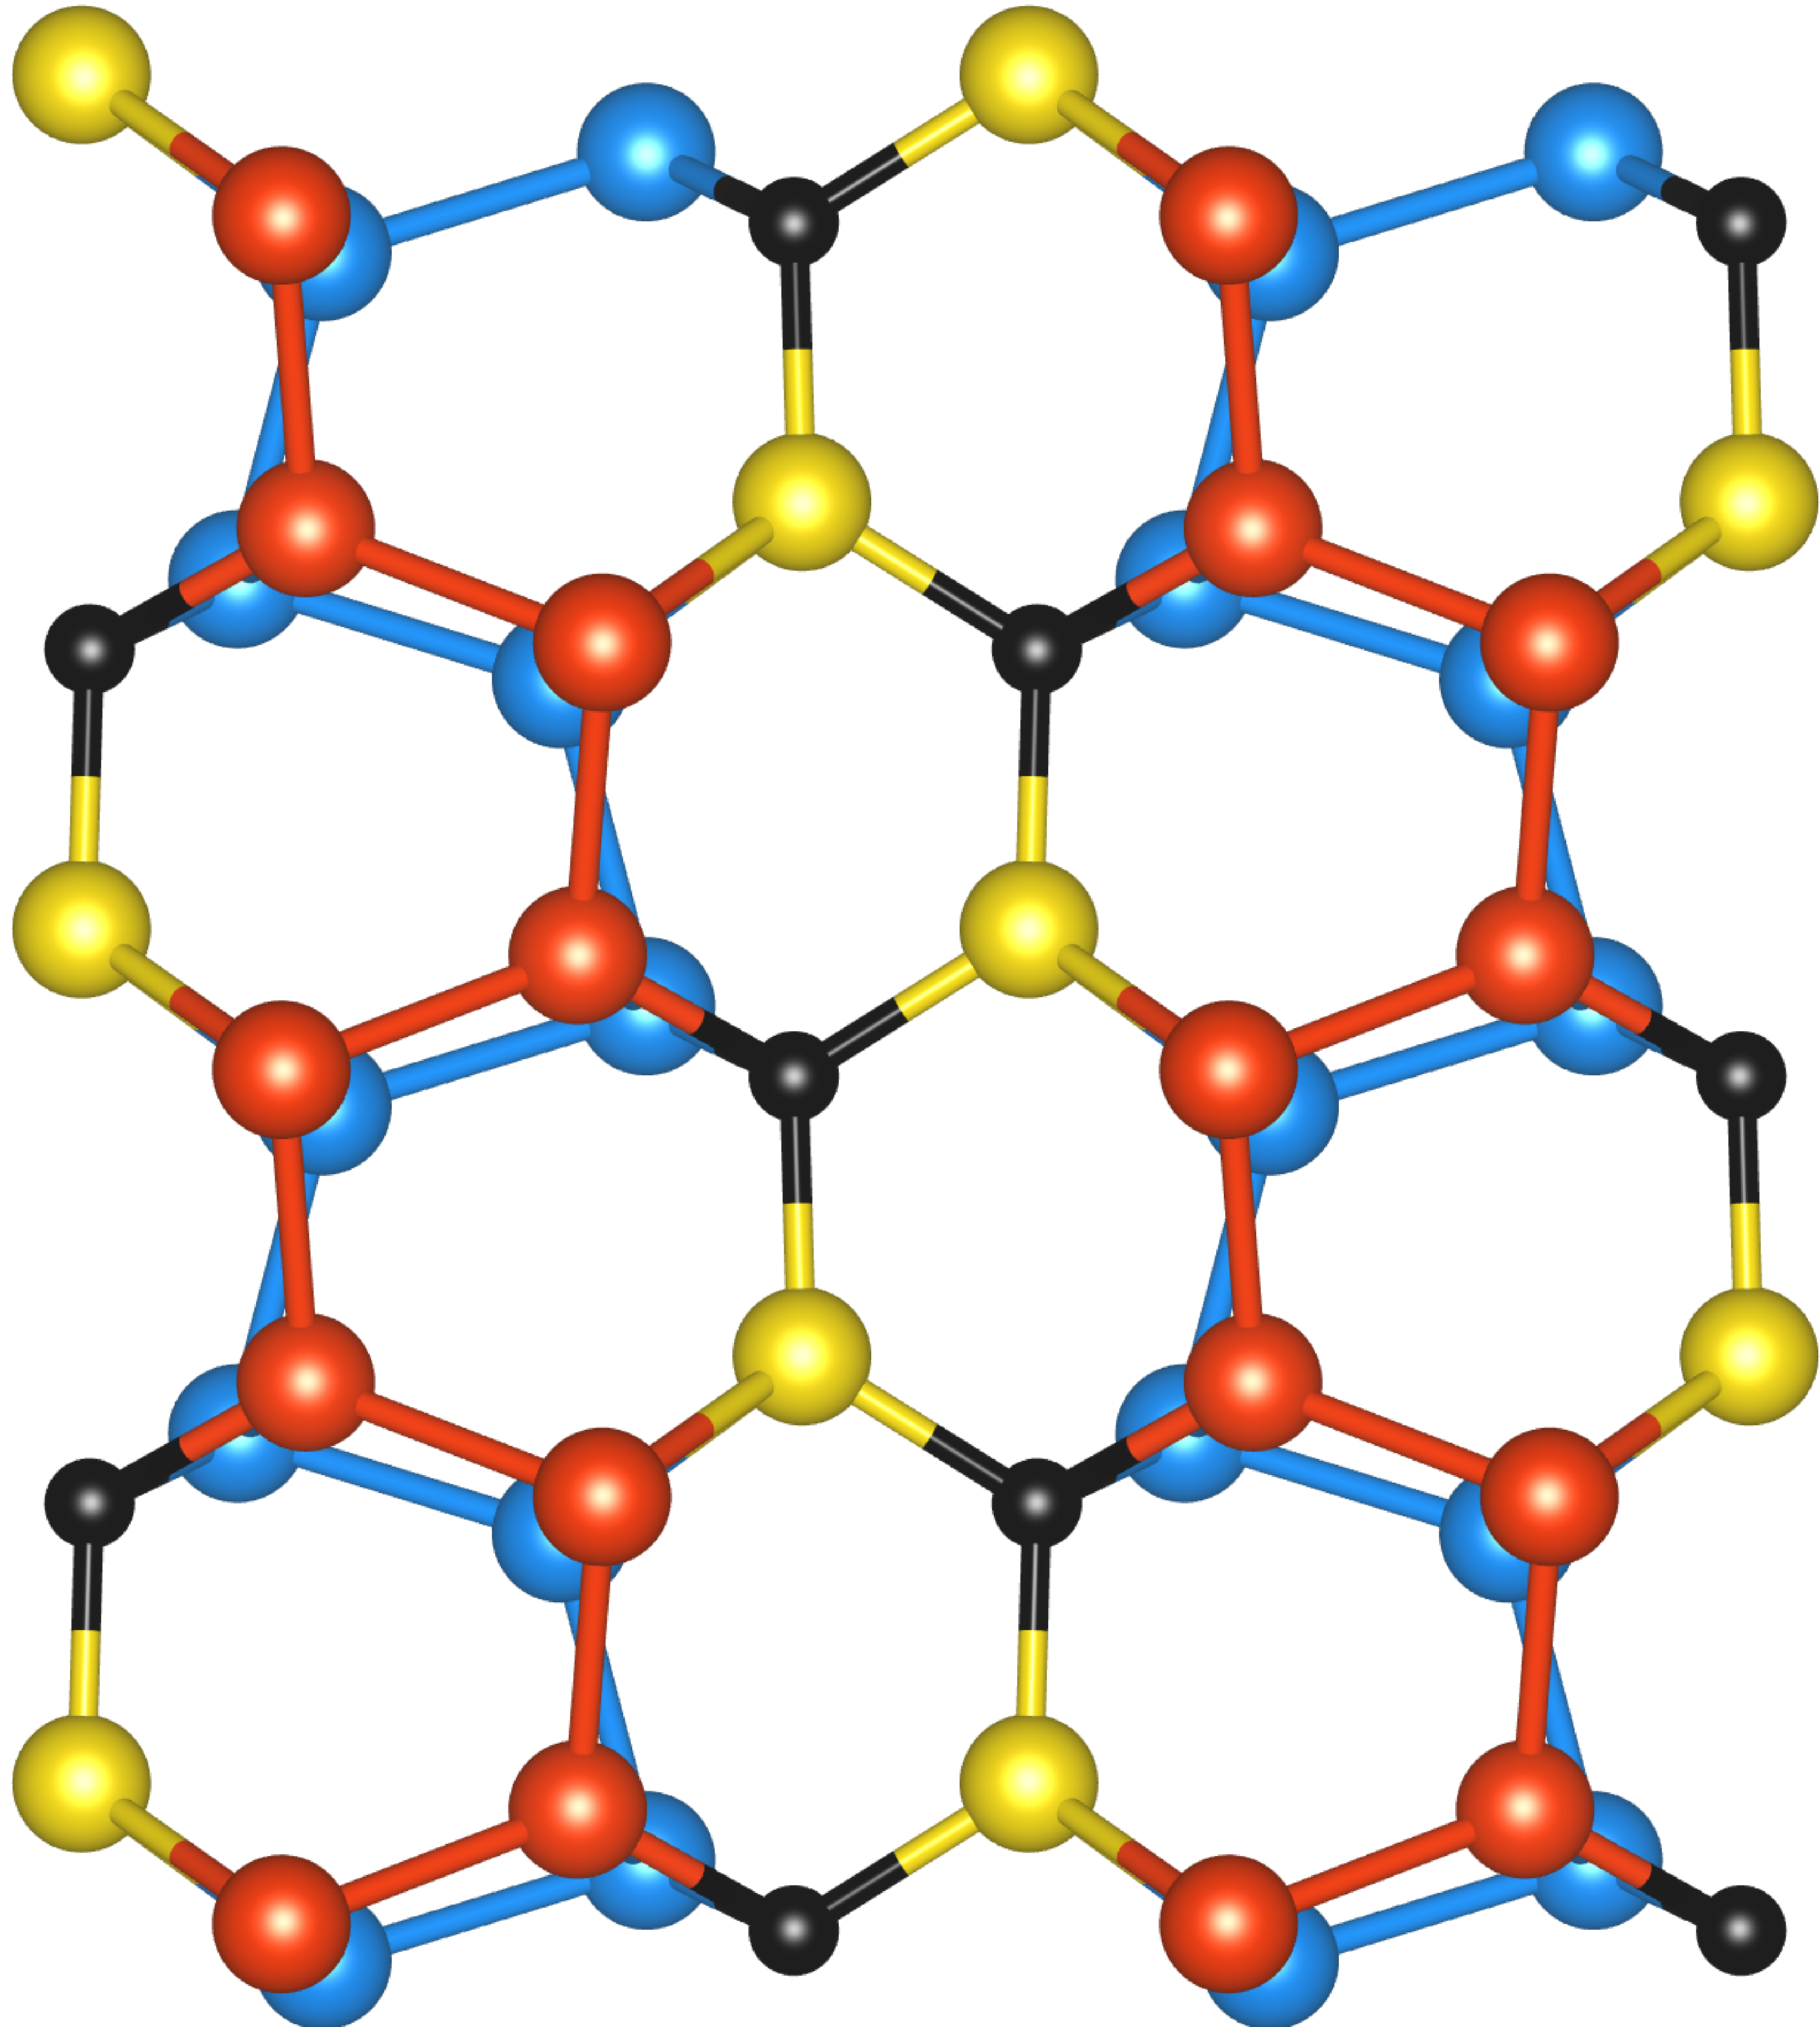

Supplement: c9cp06942a1.zip [file c9cp06942a1.zip]

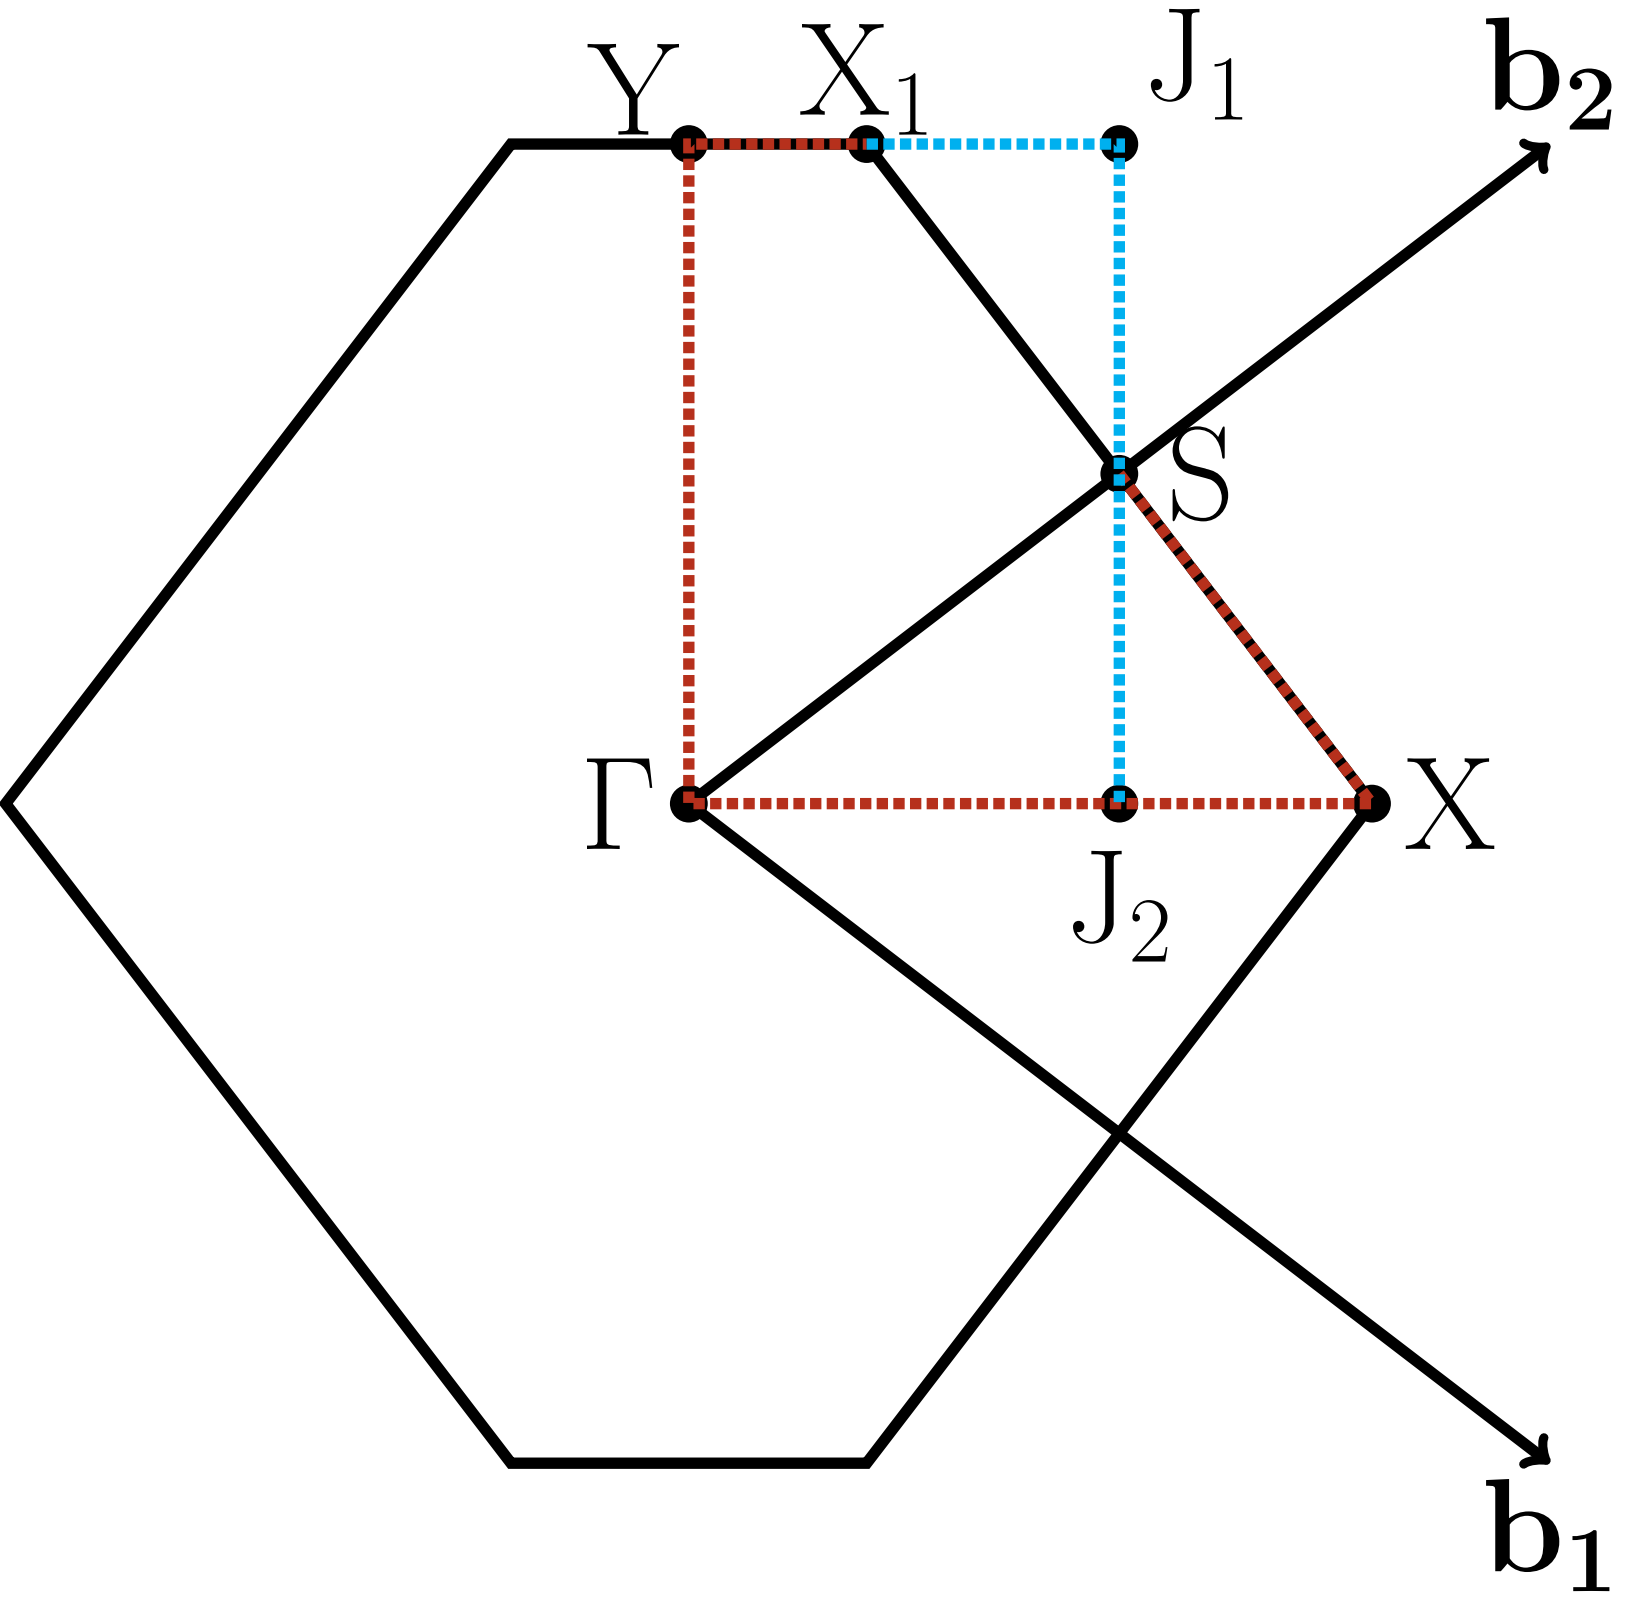

Supplement: c9cp06942a1.zip [file c9cp06942a1.zip]

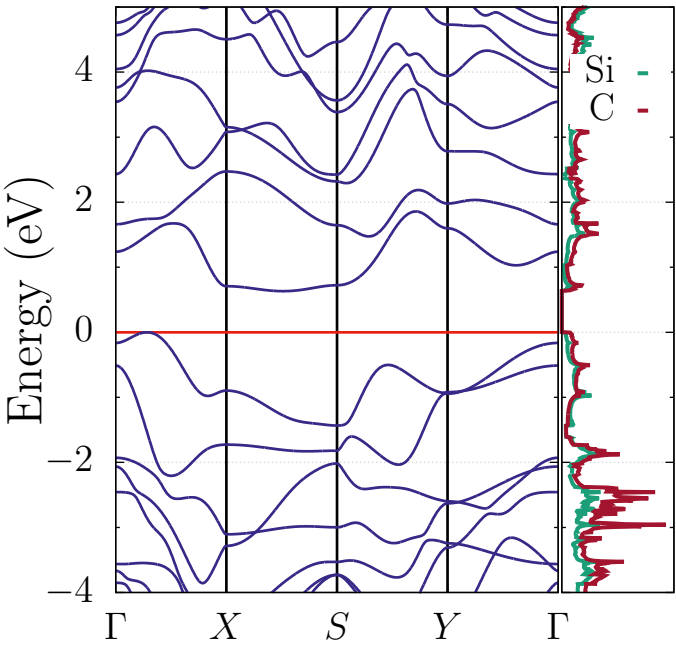

Supplement: c9cp06942a1.zip [file c9cp06942a1.zip]

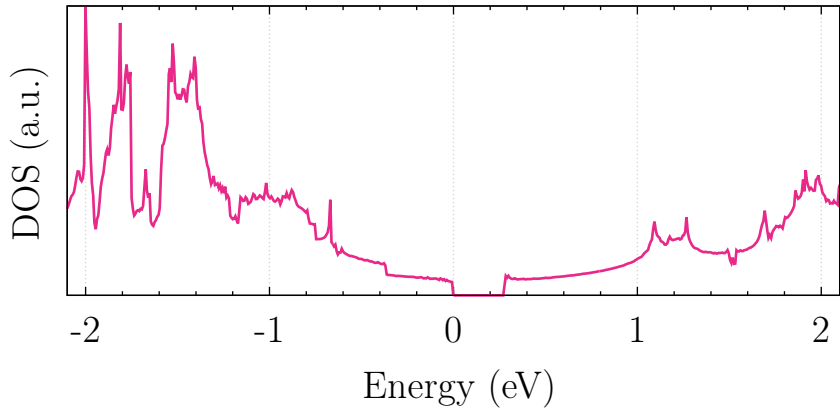

Supplement: c9cp06942a1.zip [file c9cp06942a1.zip]

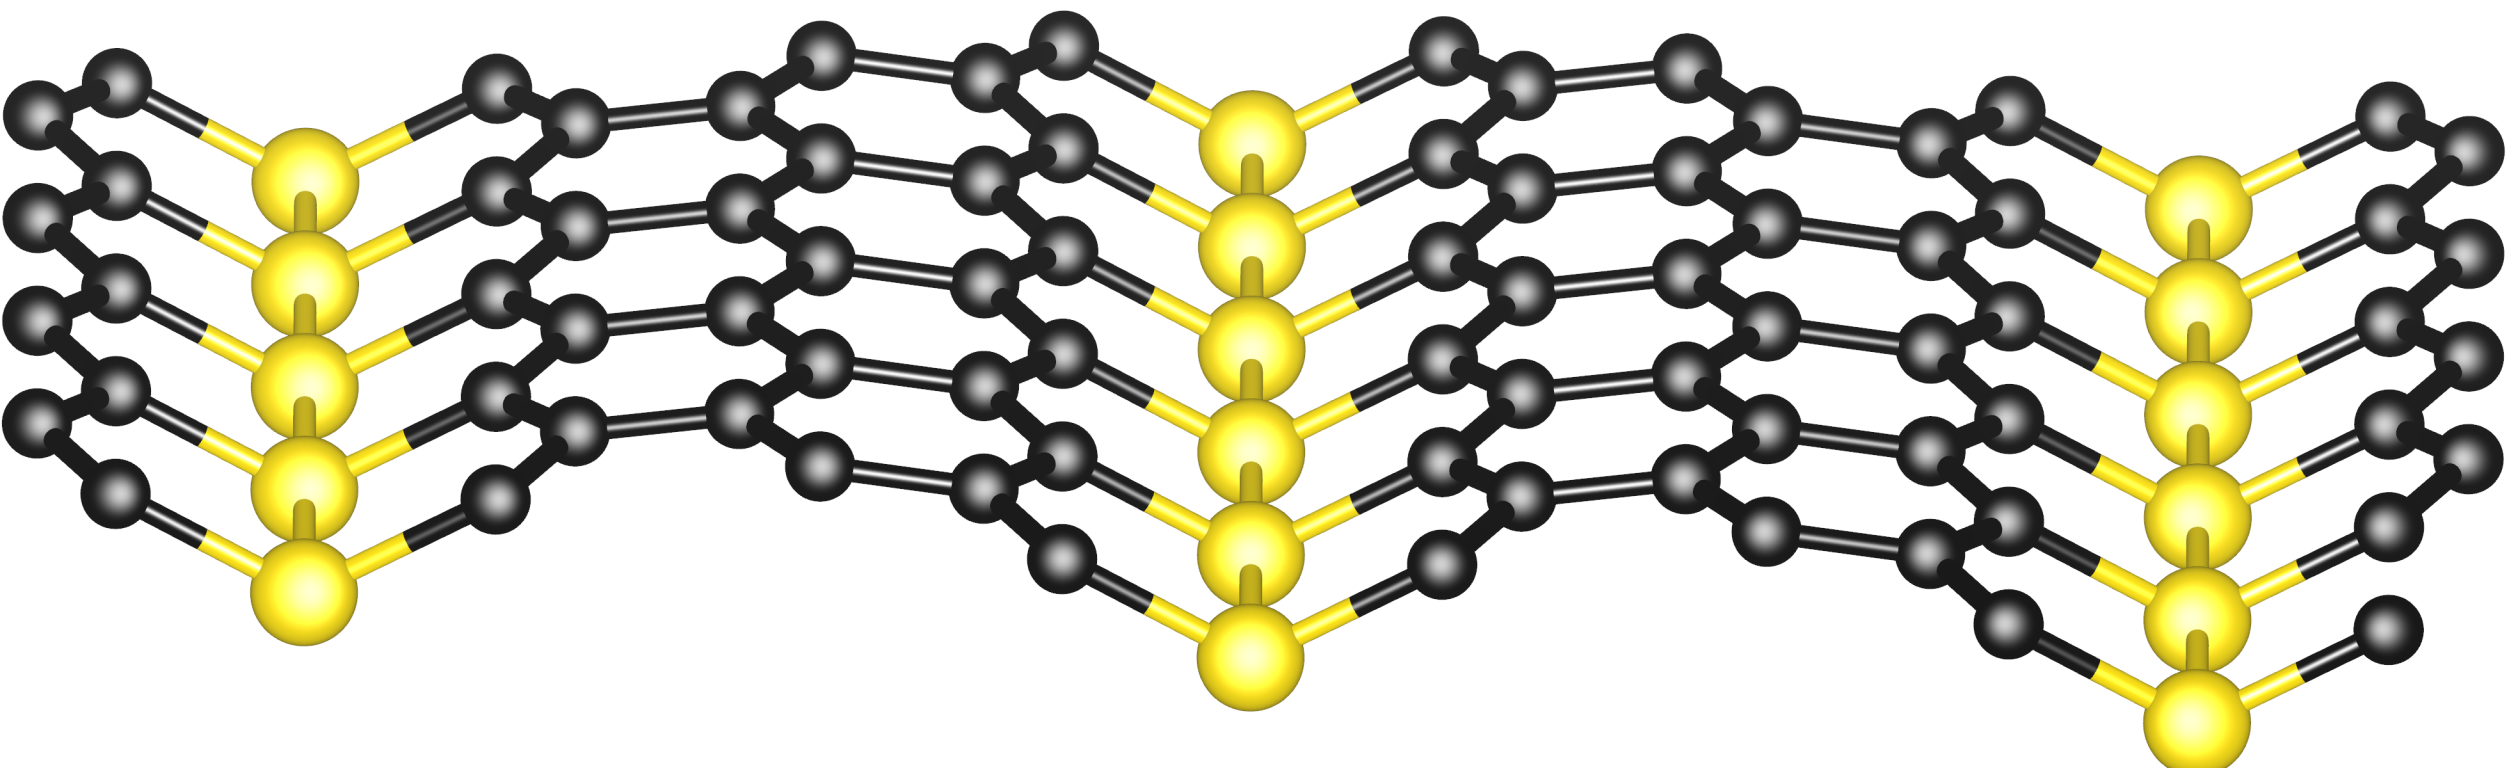

Supplement: c9cp06942a1.zip [file c9cp06942a1.zip]

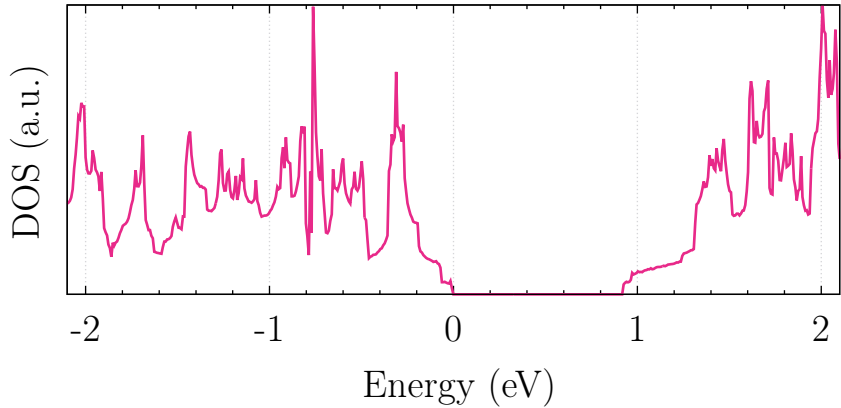

Supplement: c9cp06942a1.zip [file c9cp06942a1.zip]

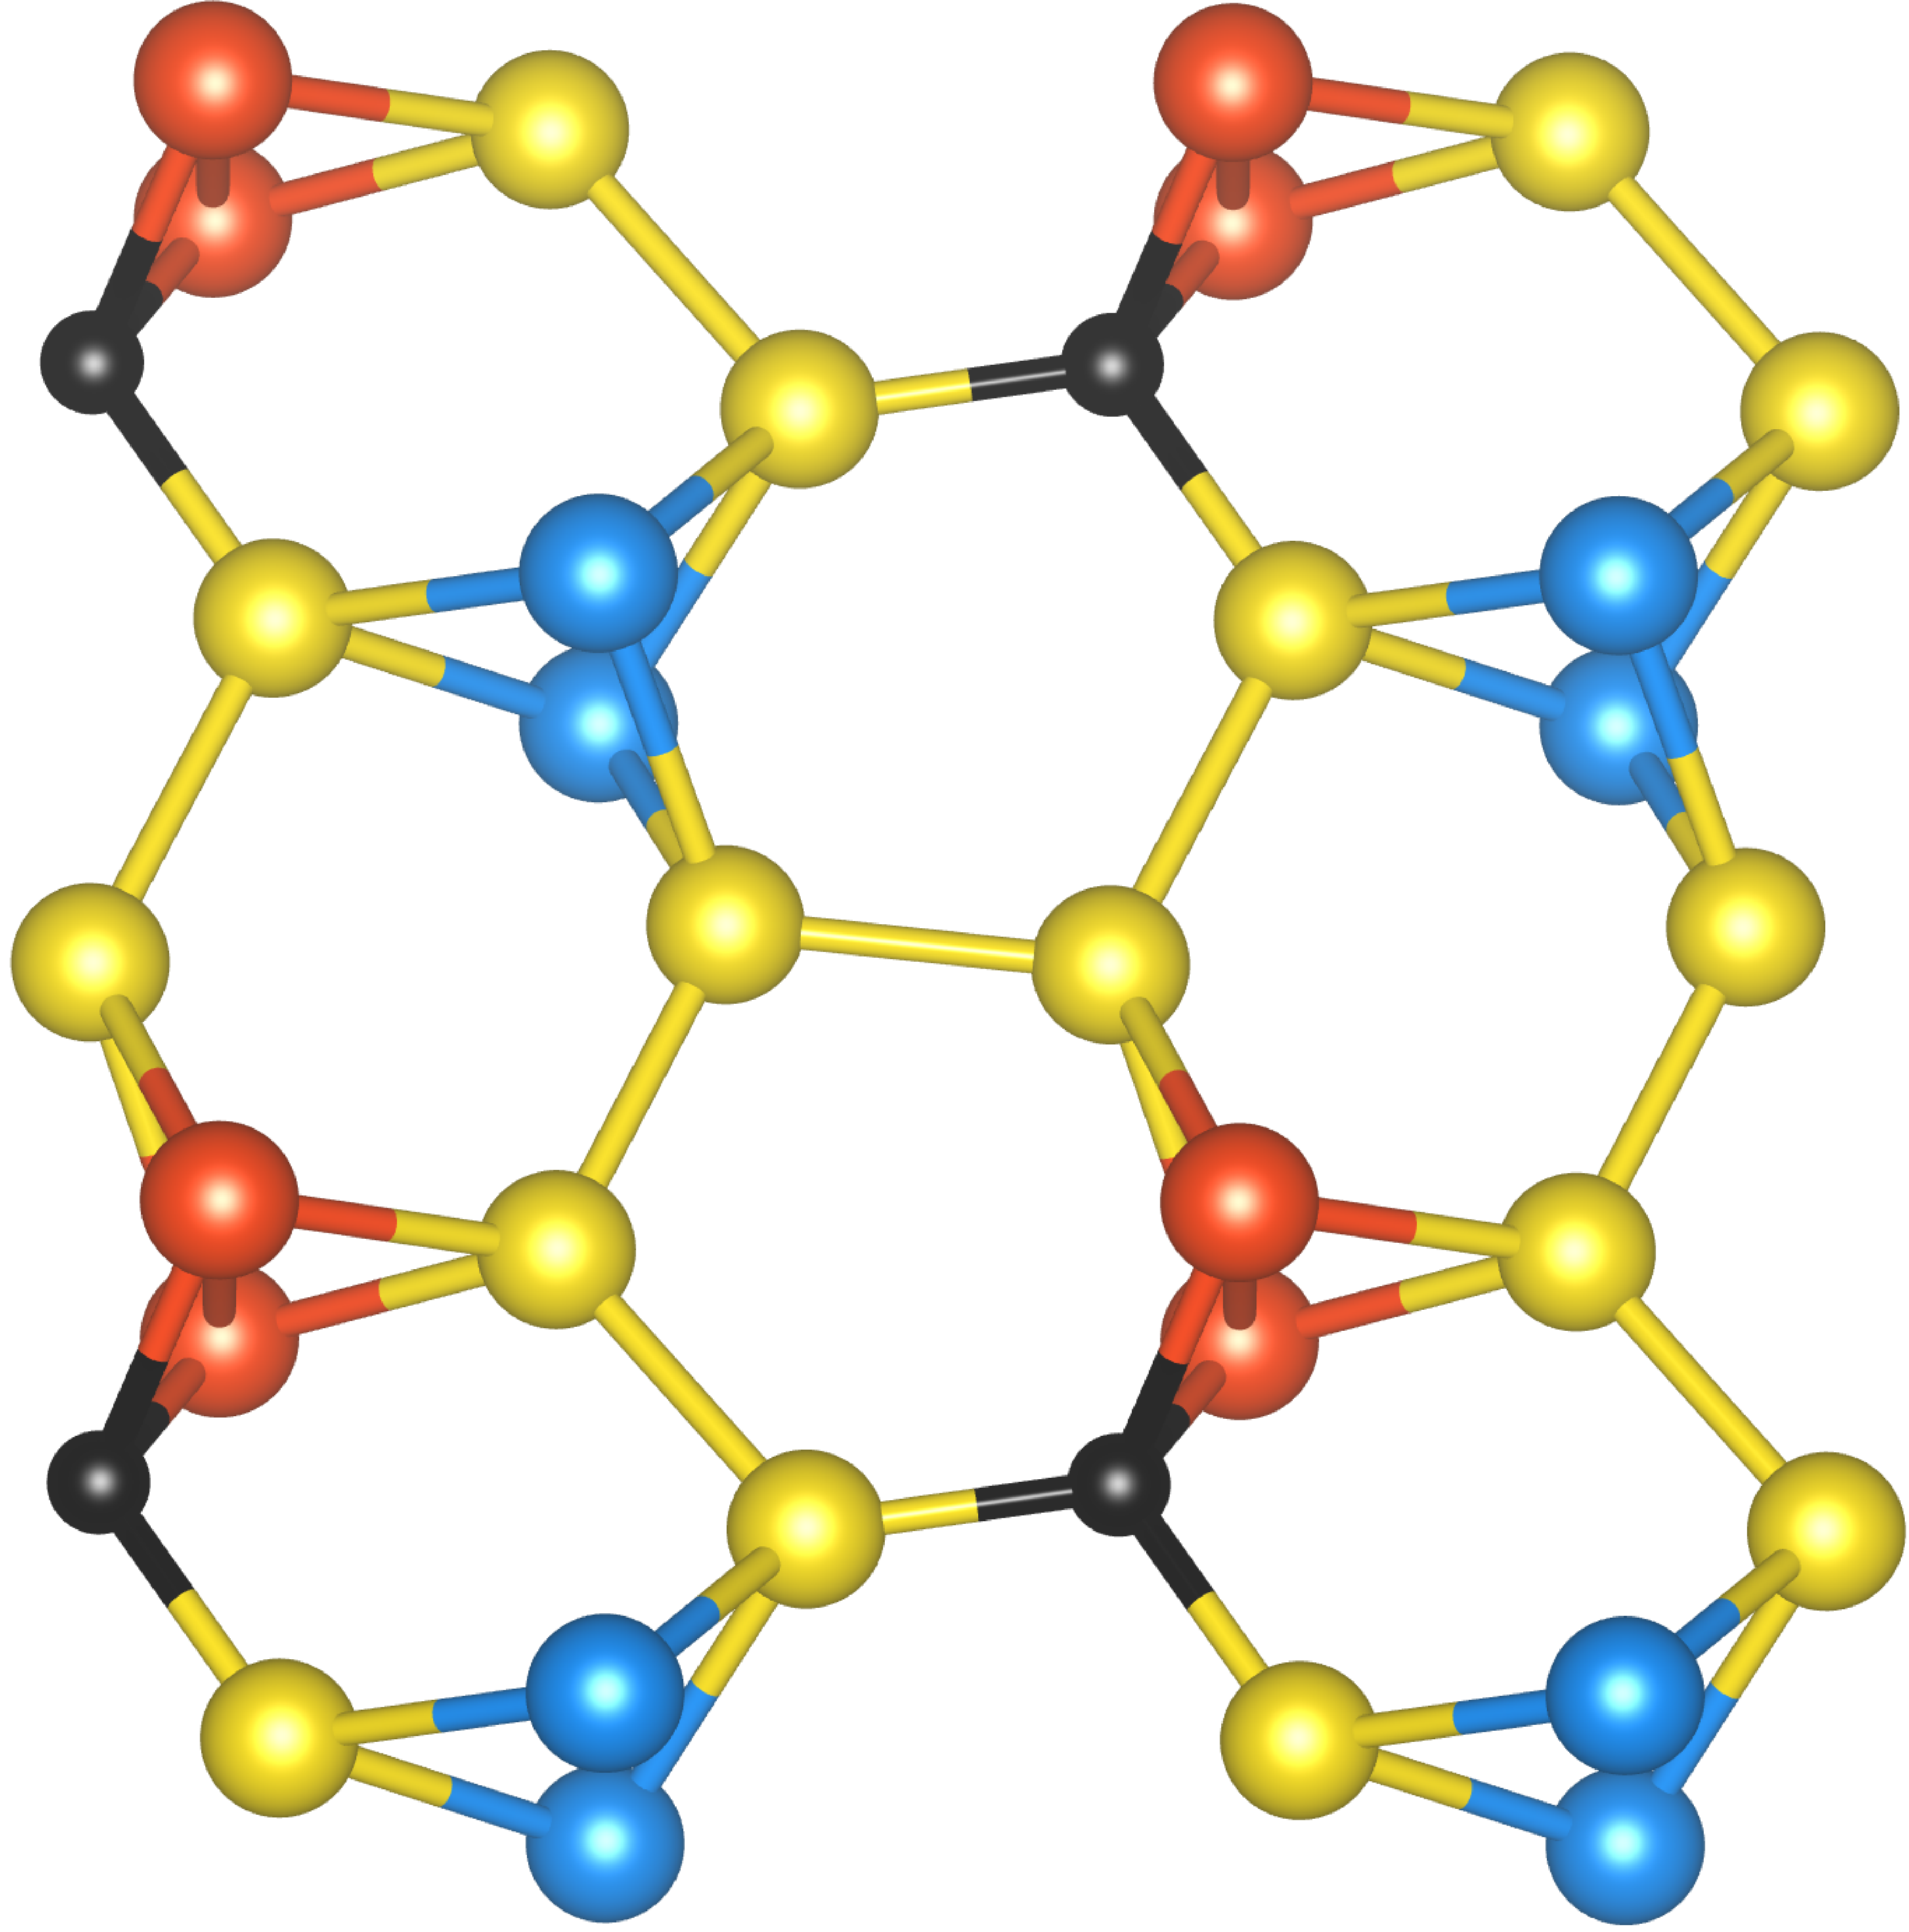

Supplement: c9cp06942a1.zip [file c9cp06942a1.zip]

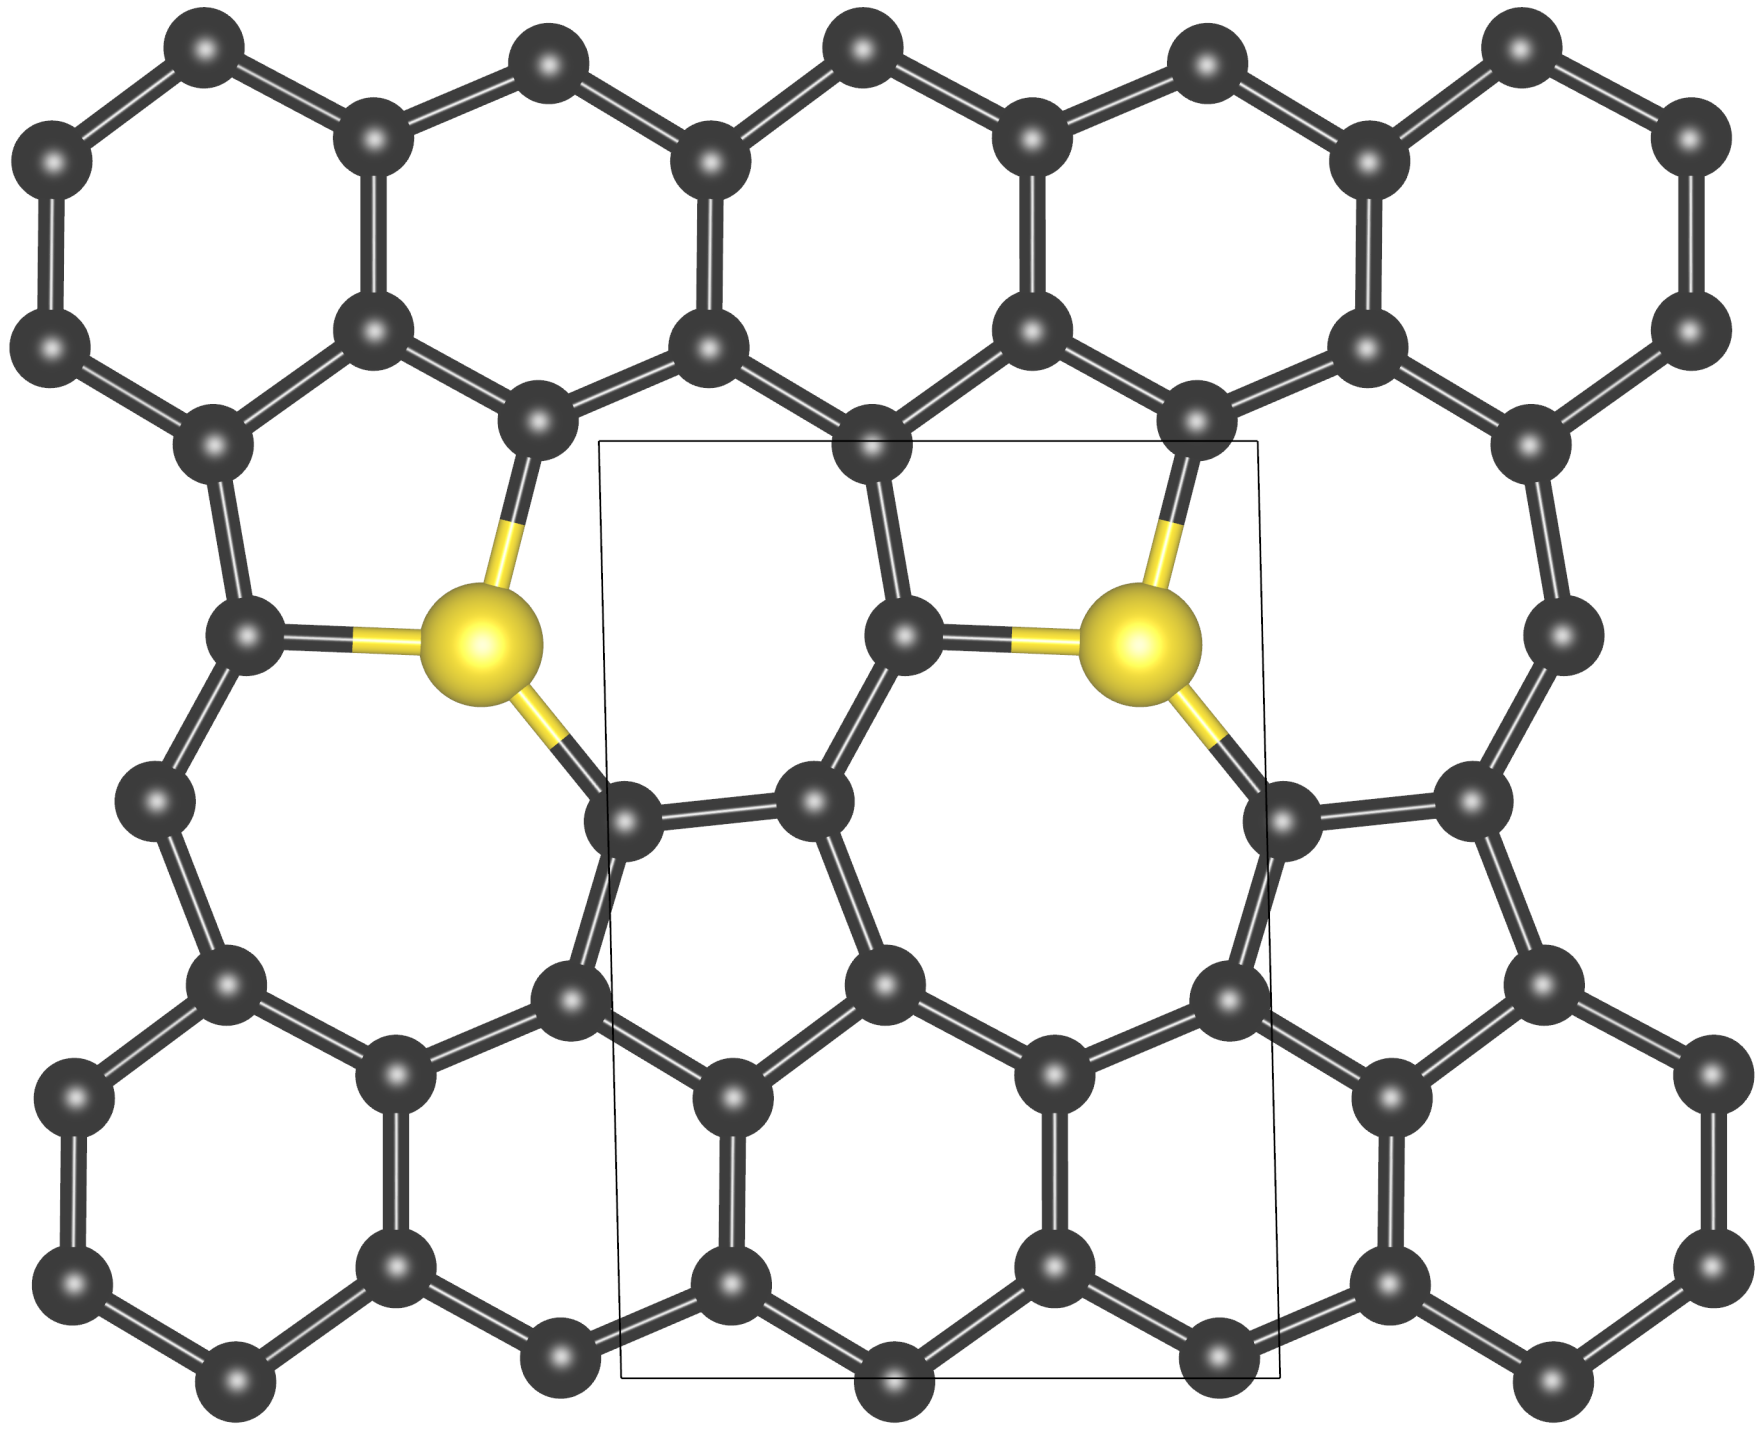

Supplement: c9cp06942a1.zip [file c9cp06942a1.zip]

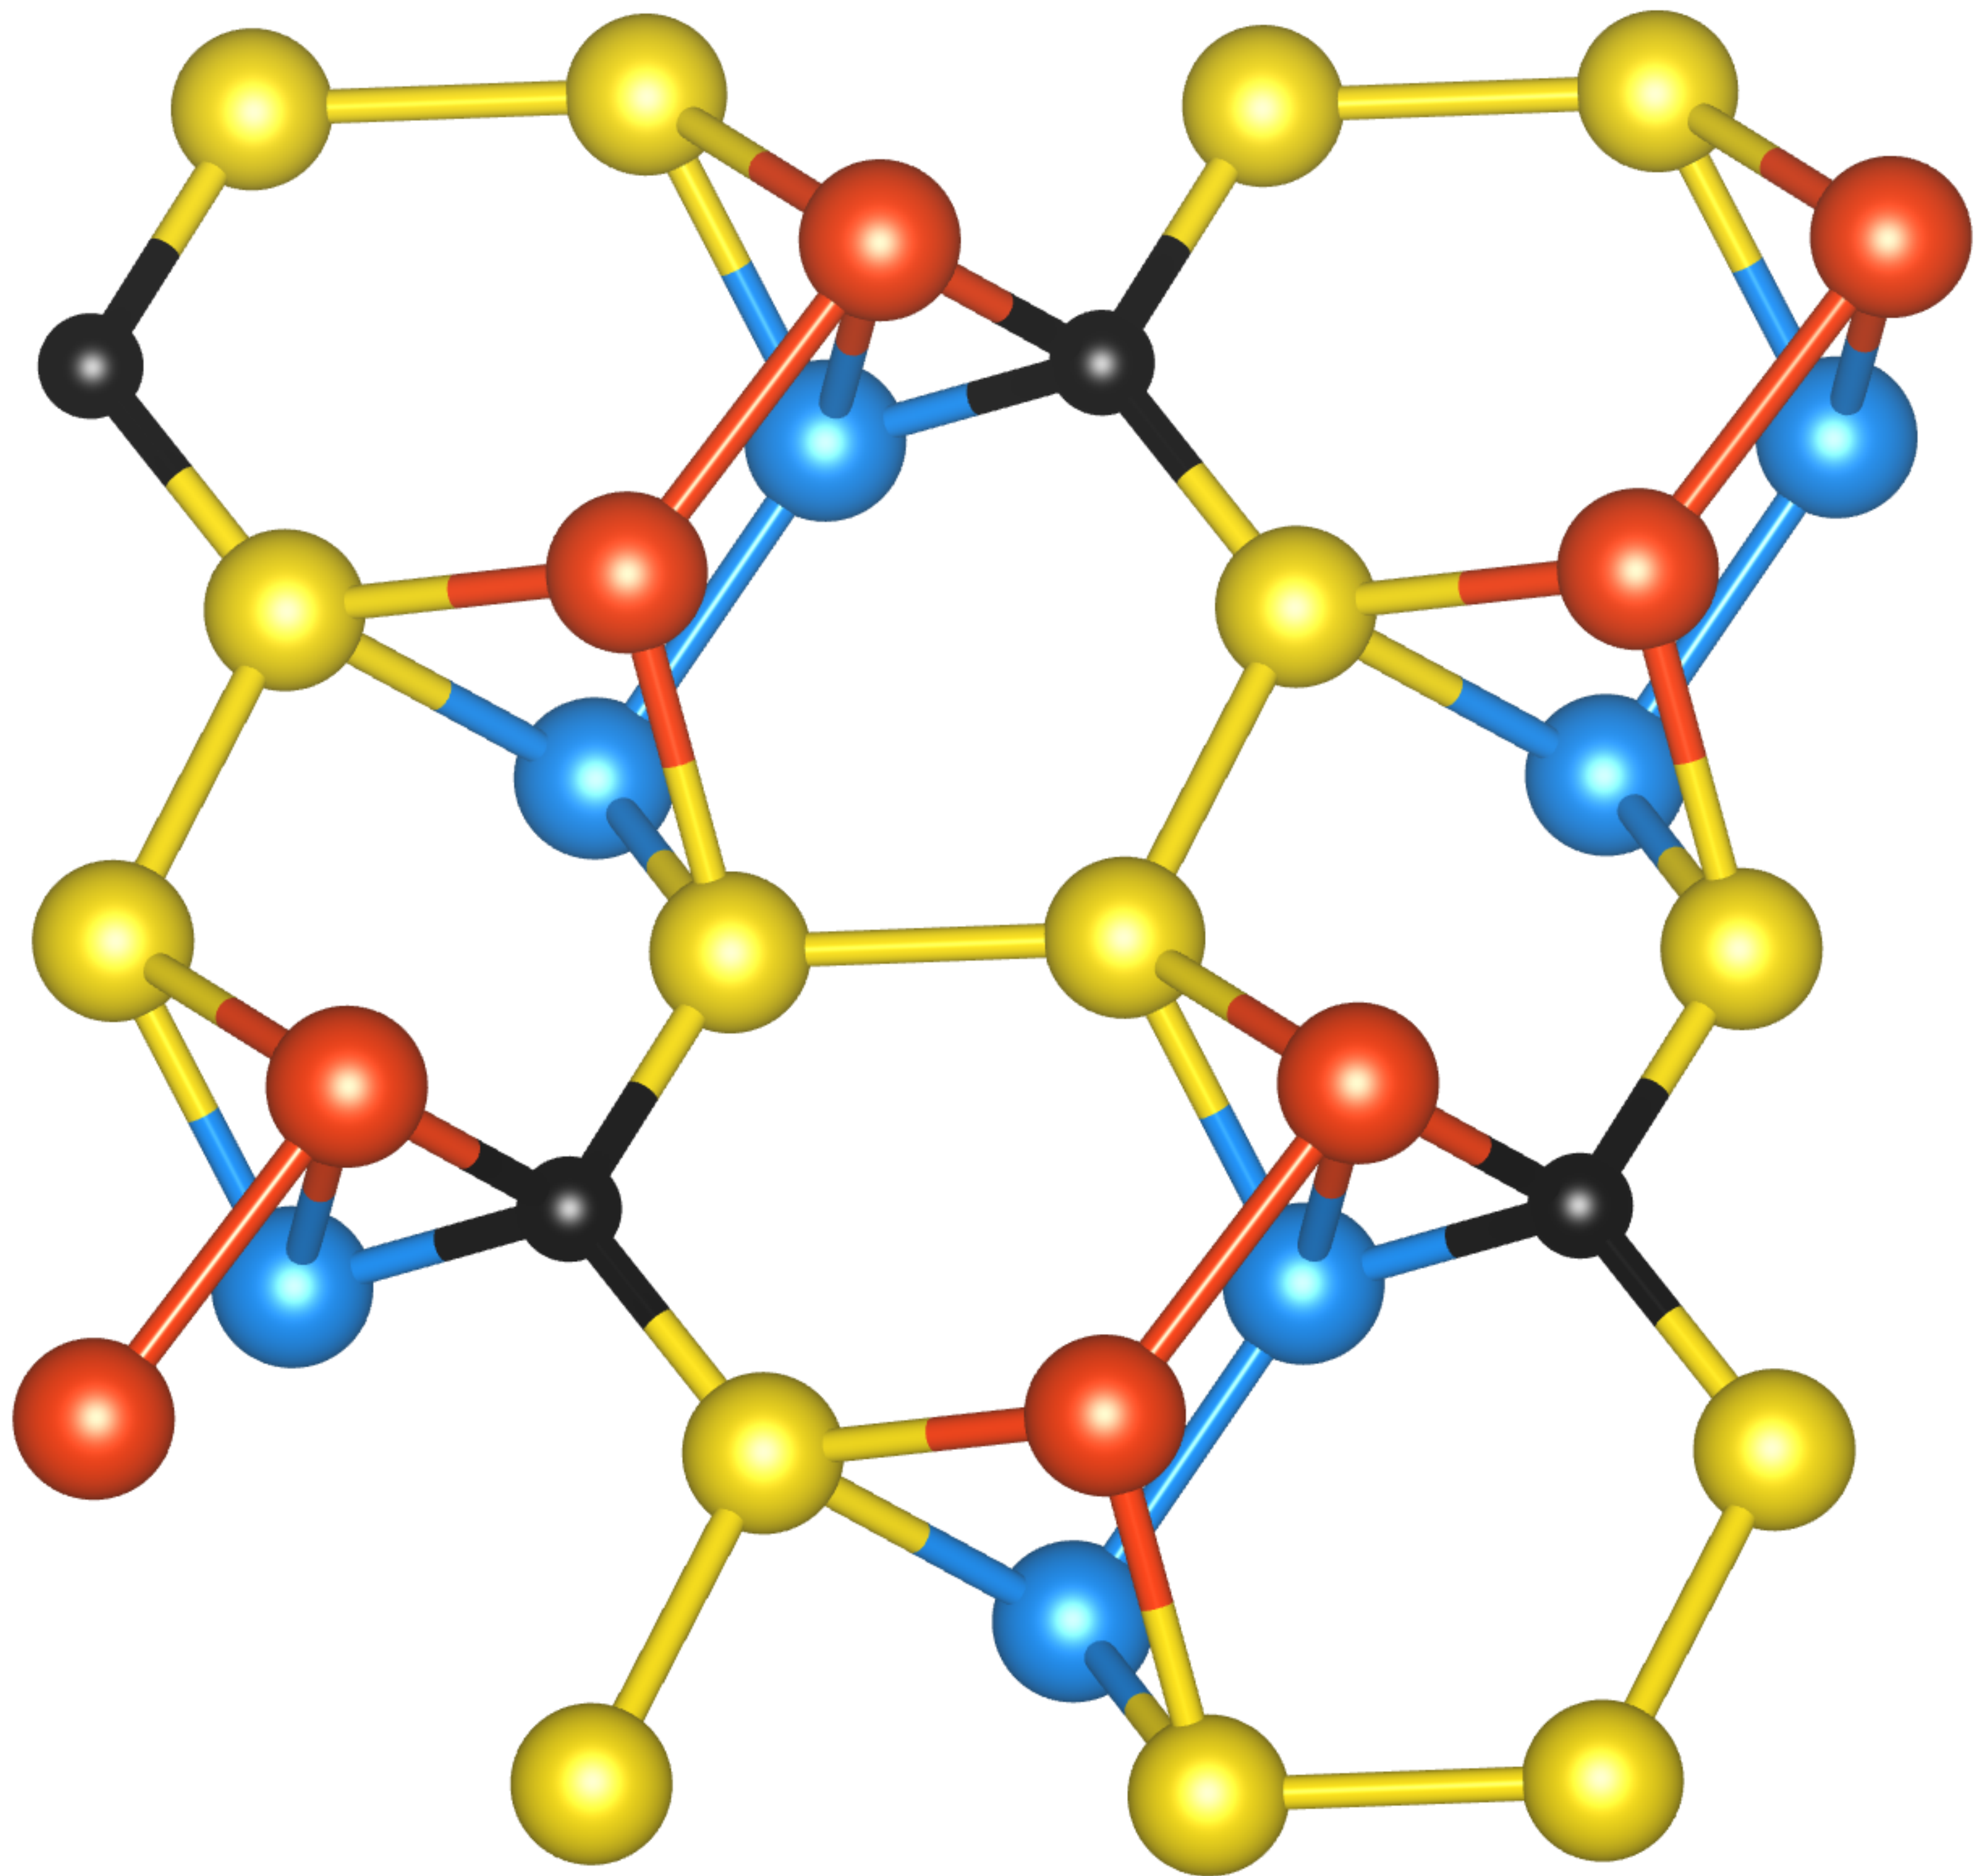

Supplement: c9cp06942a1.zip [file c9cp06942a1.zip]

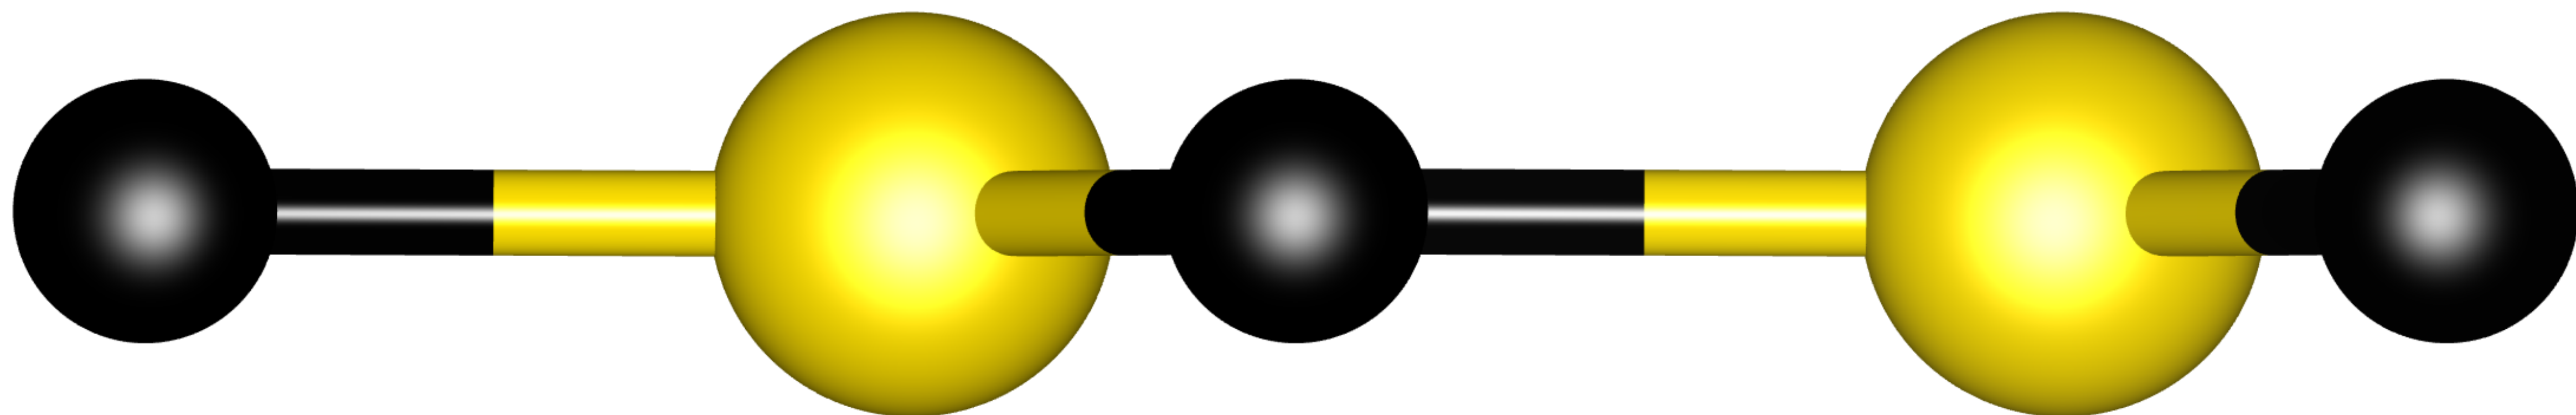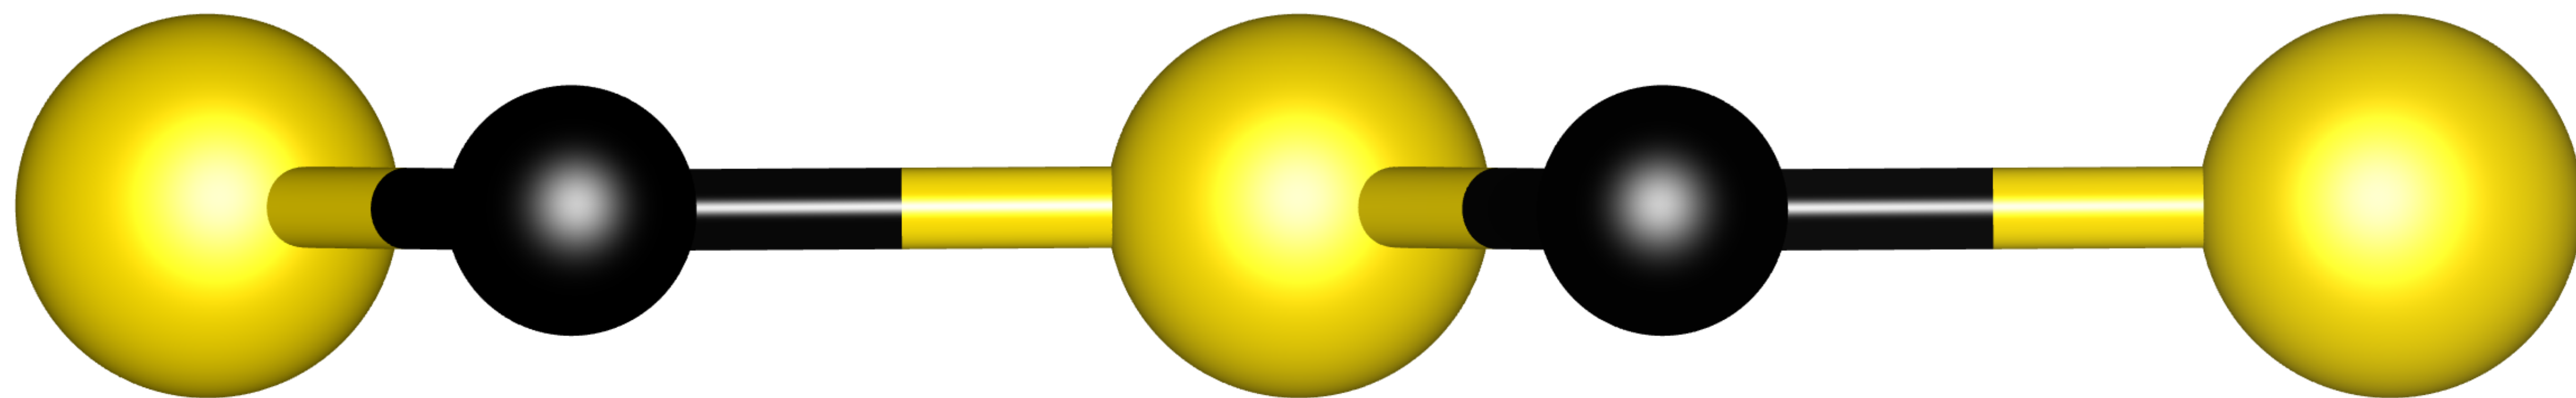

Supplement: c9cp06942a1.zip [file c9cp06942a1.zip]

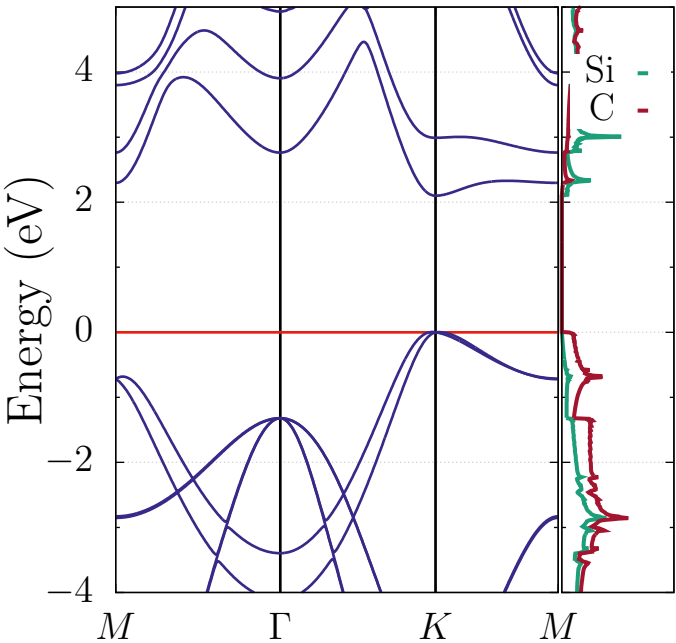

Supplement: c9cp06942a1.zip [file c9cp06942a1.zip]

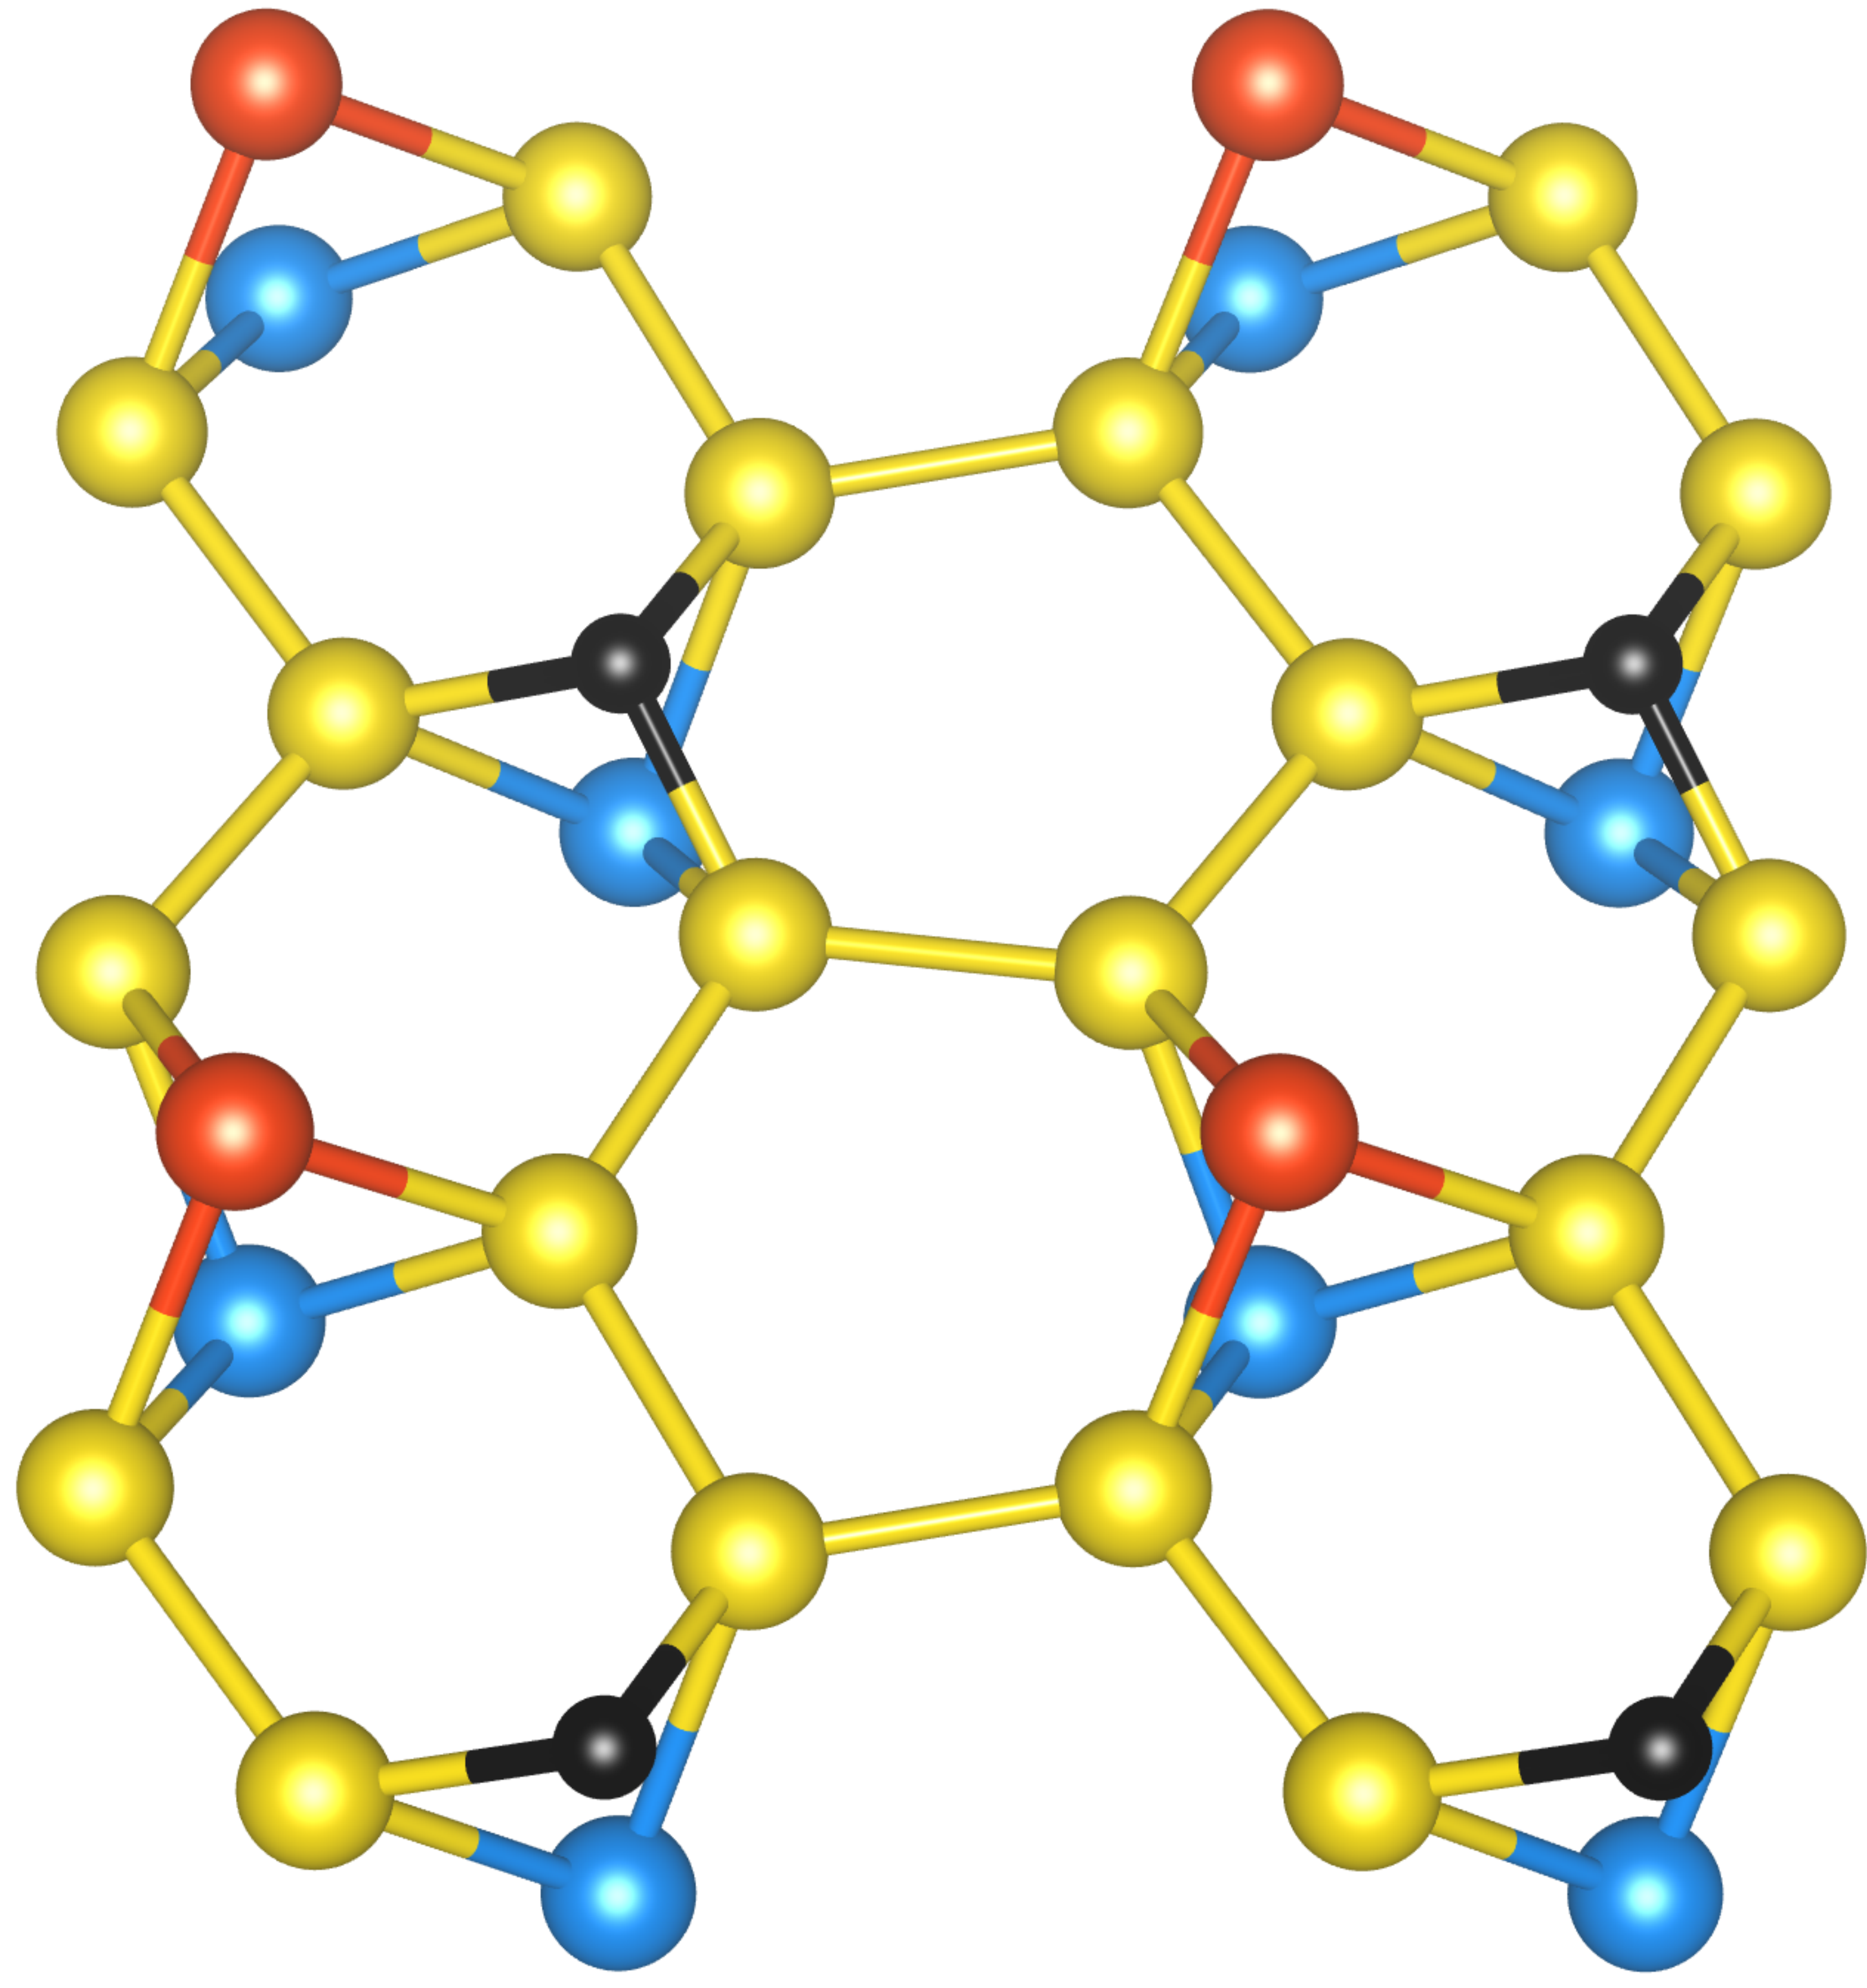

Supplement: c9cp06942a1.zip [file c9cp06942a1.zip]

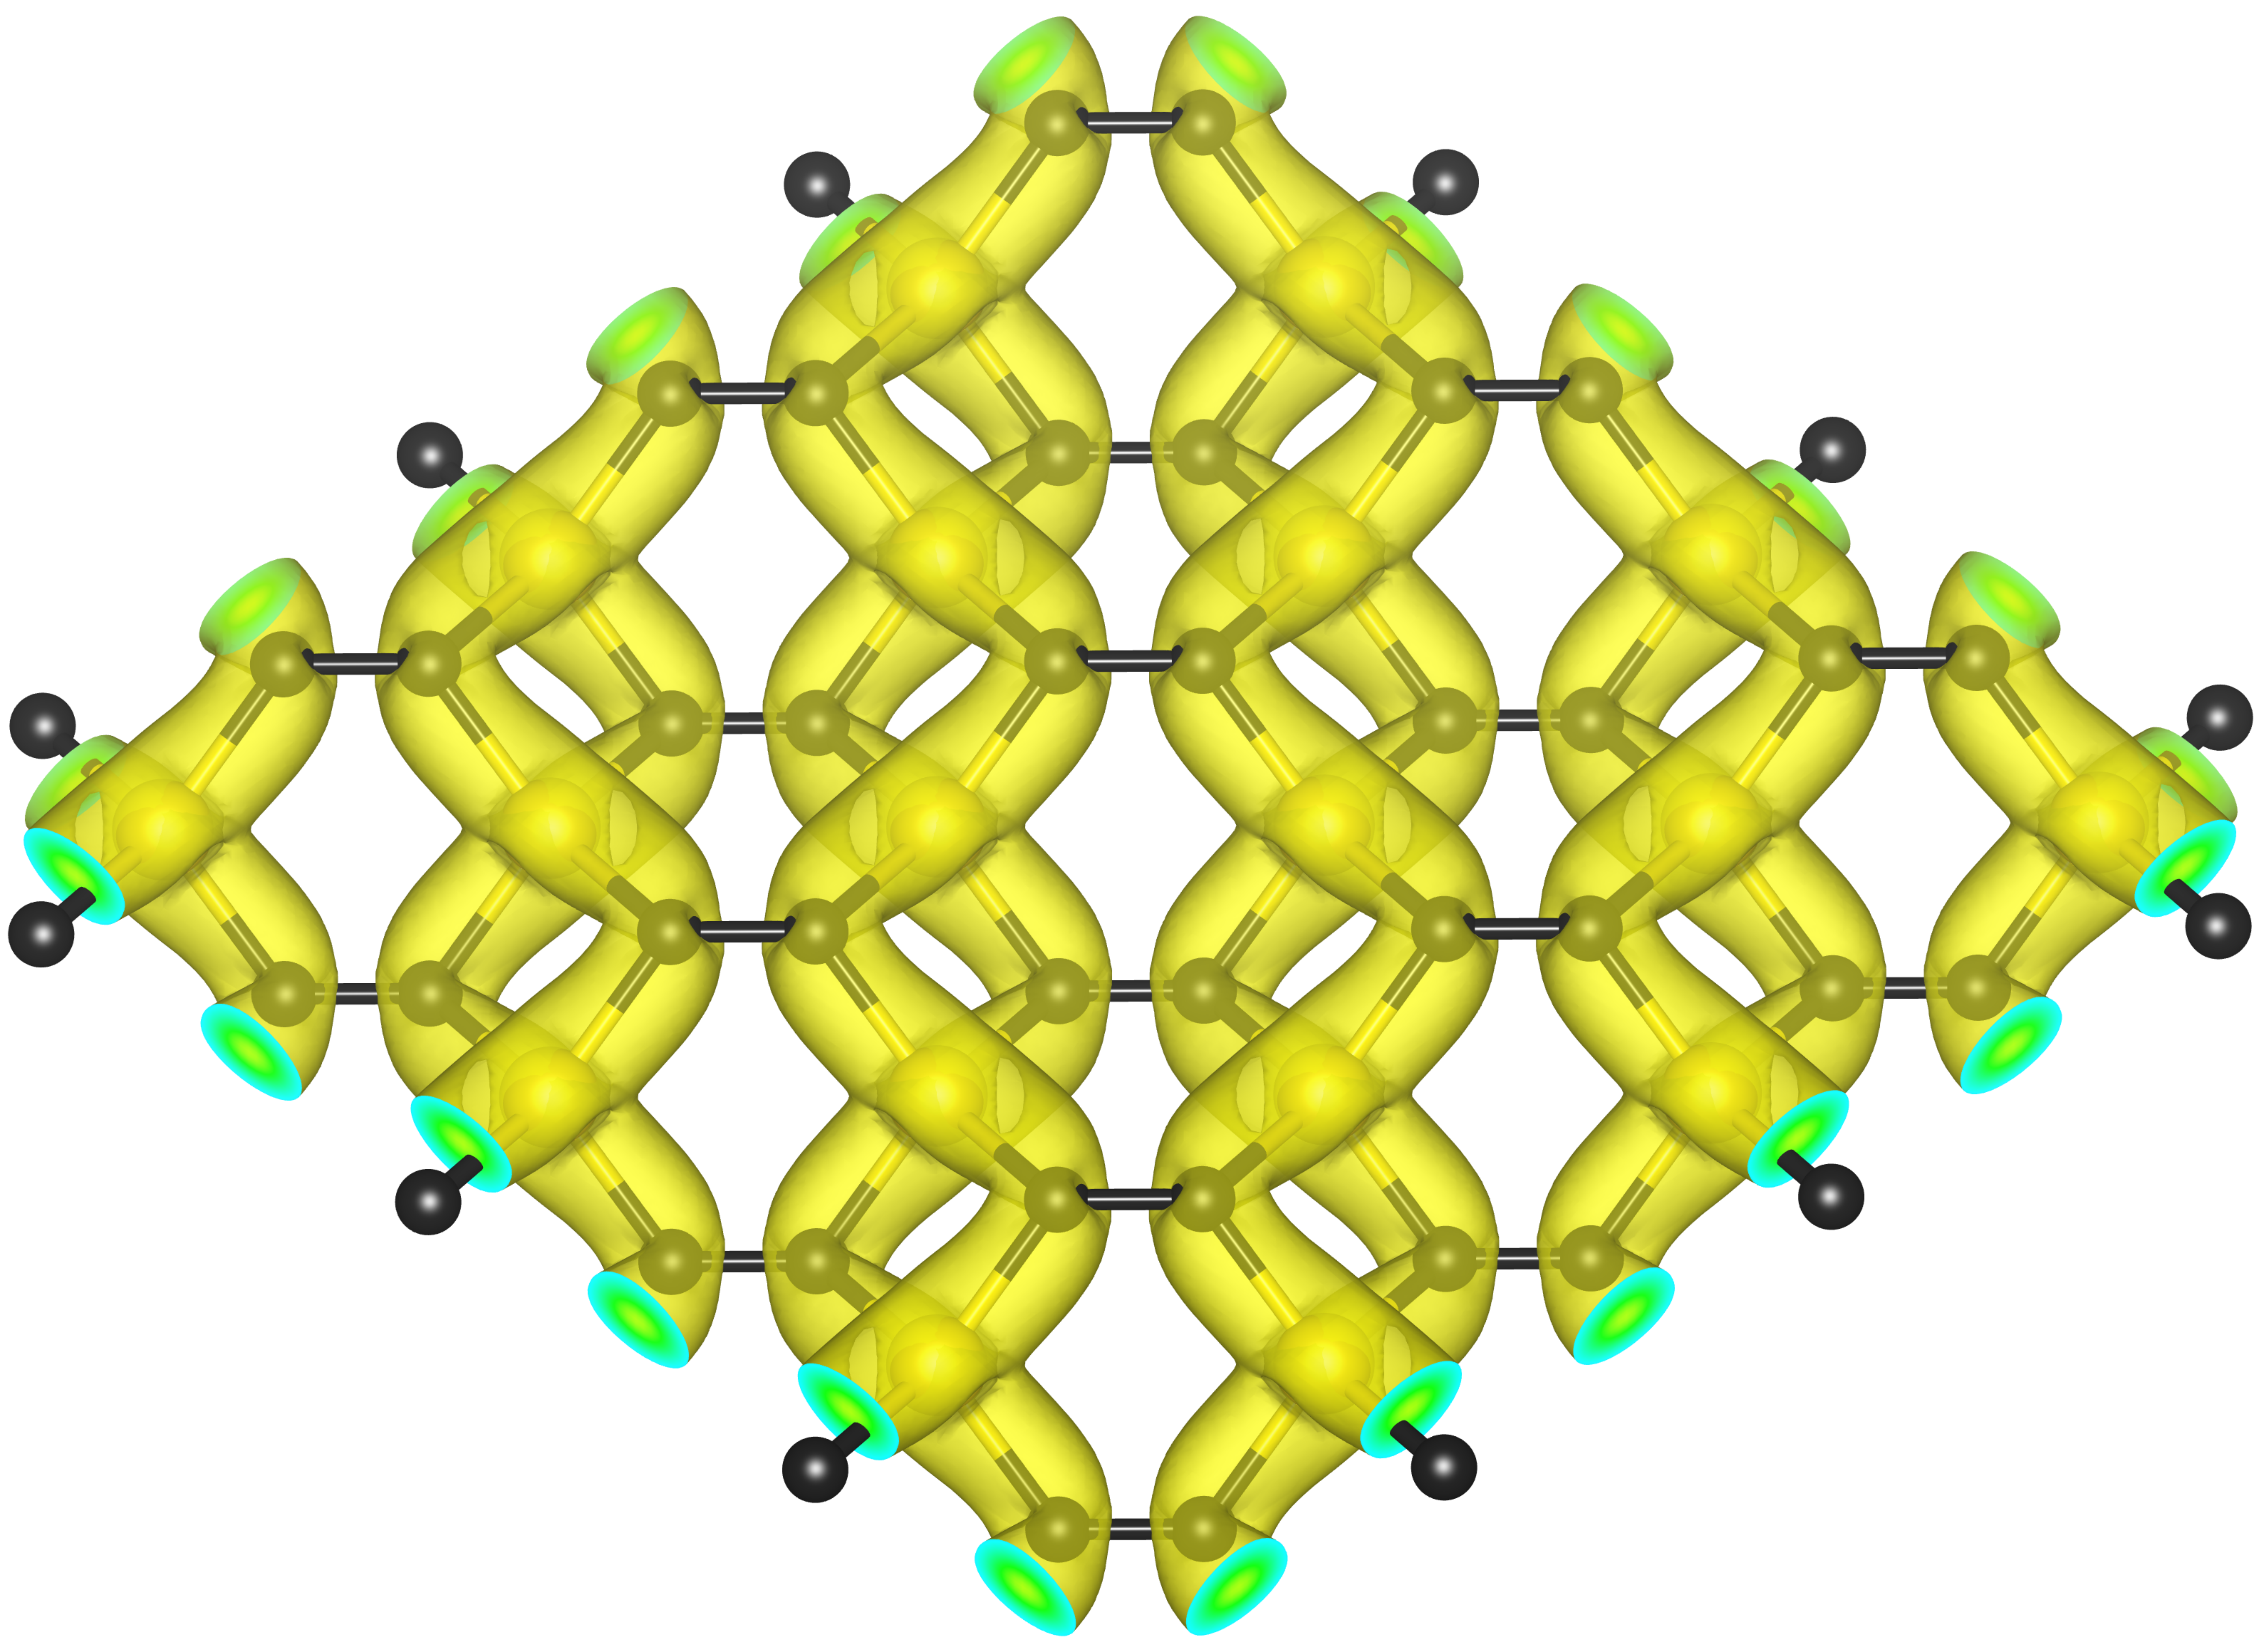

Supplement: c9cp06942a1.zip [file c9cp06942a1.zip]

Energy (eV)

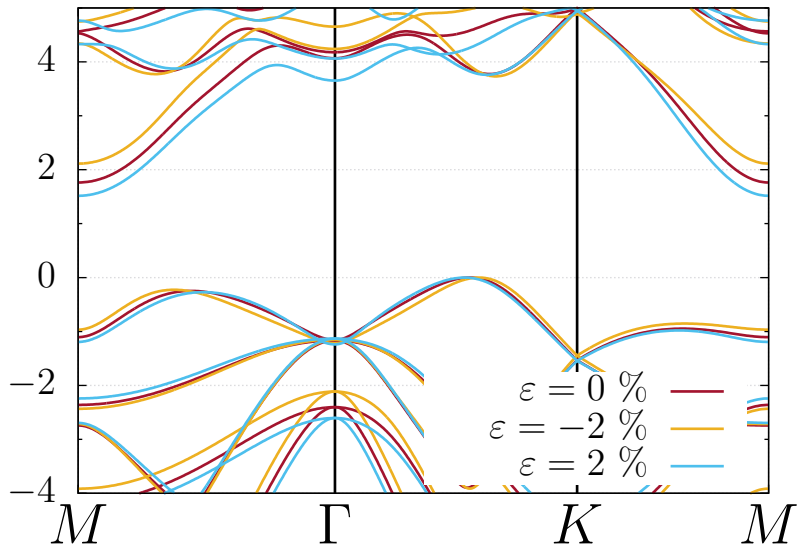

Supplement: c9cp06942a1.zip [file c9cp06942a1.zip]

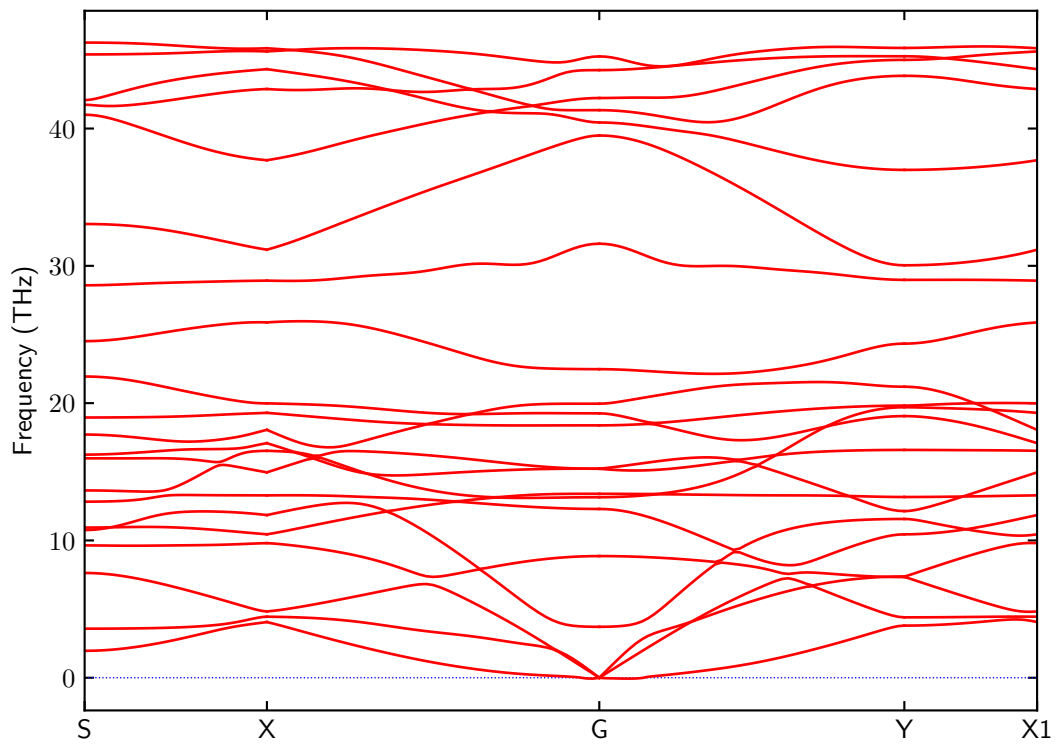

Supplement: c9cp06942a1.zip [file c9cp06942a1.zip]

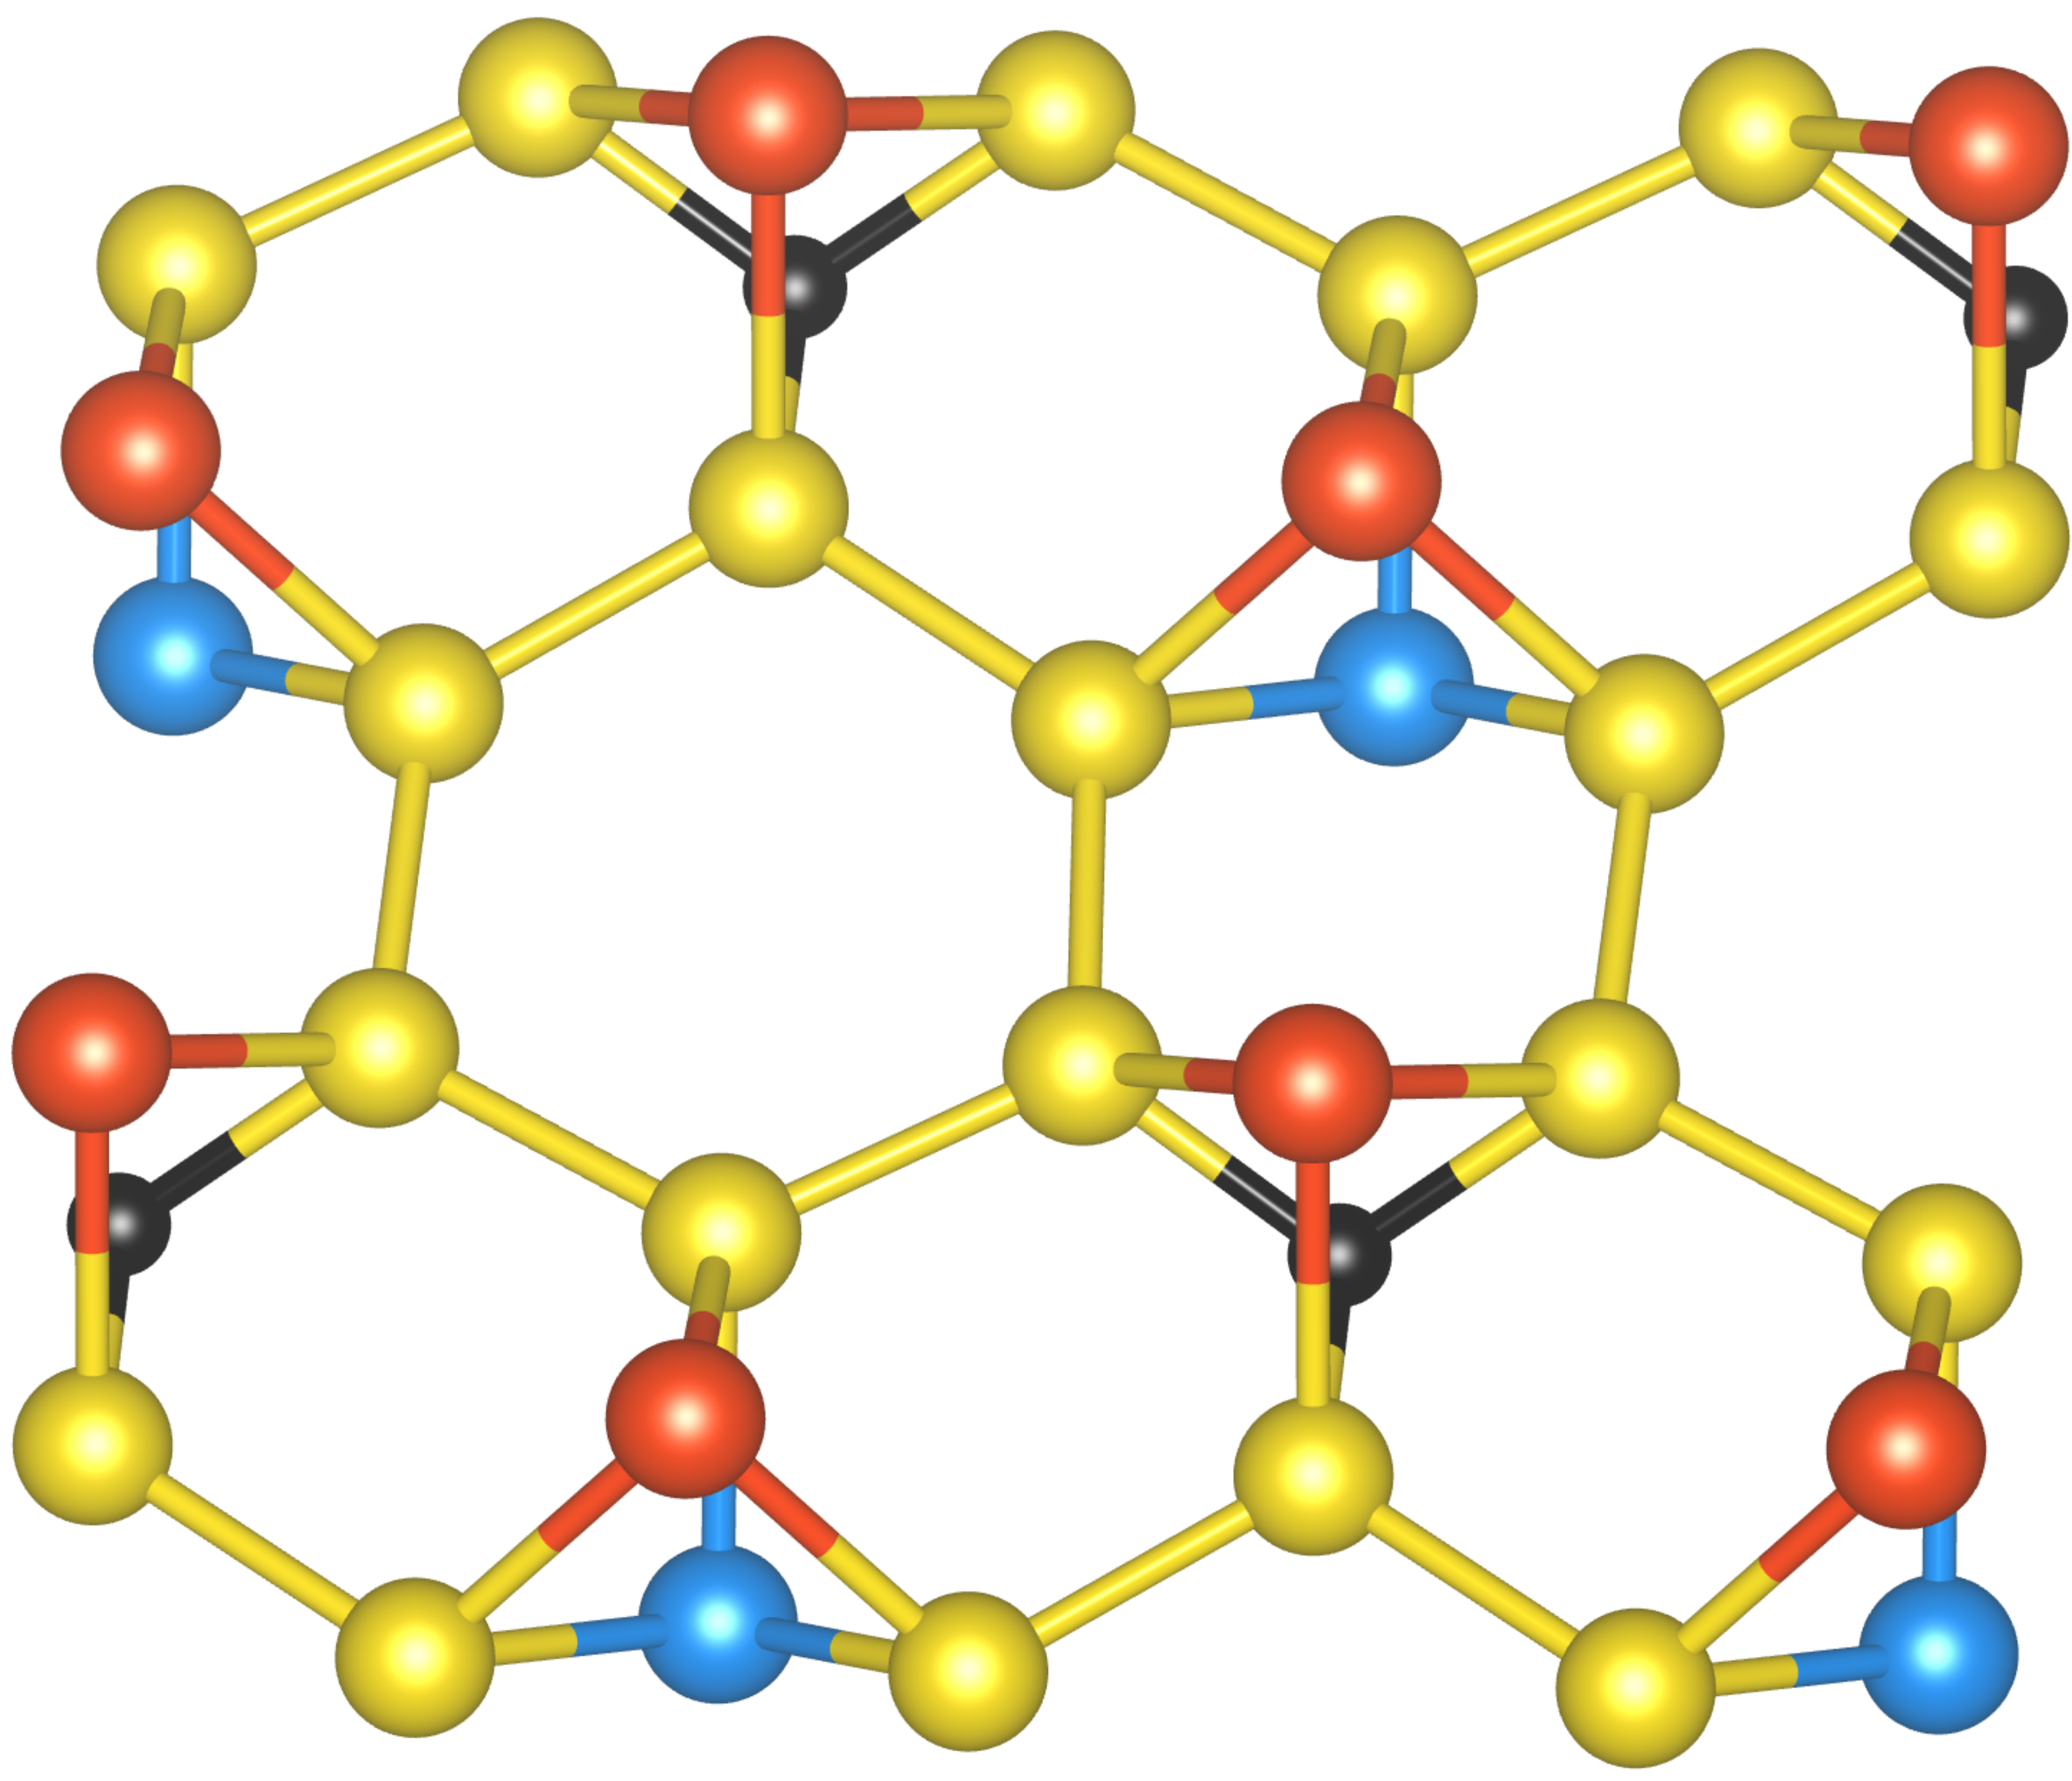

Supplement: c9cp06942a1.zip [file c9cp06942a1.zip]

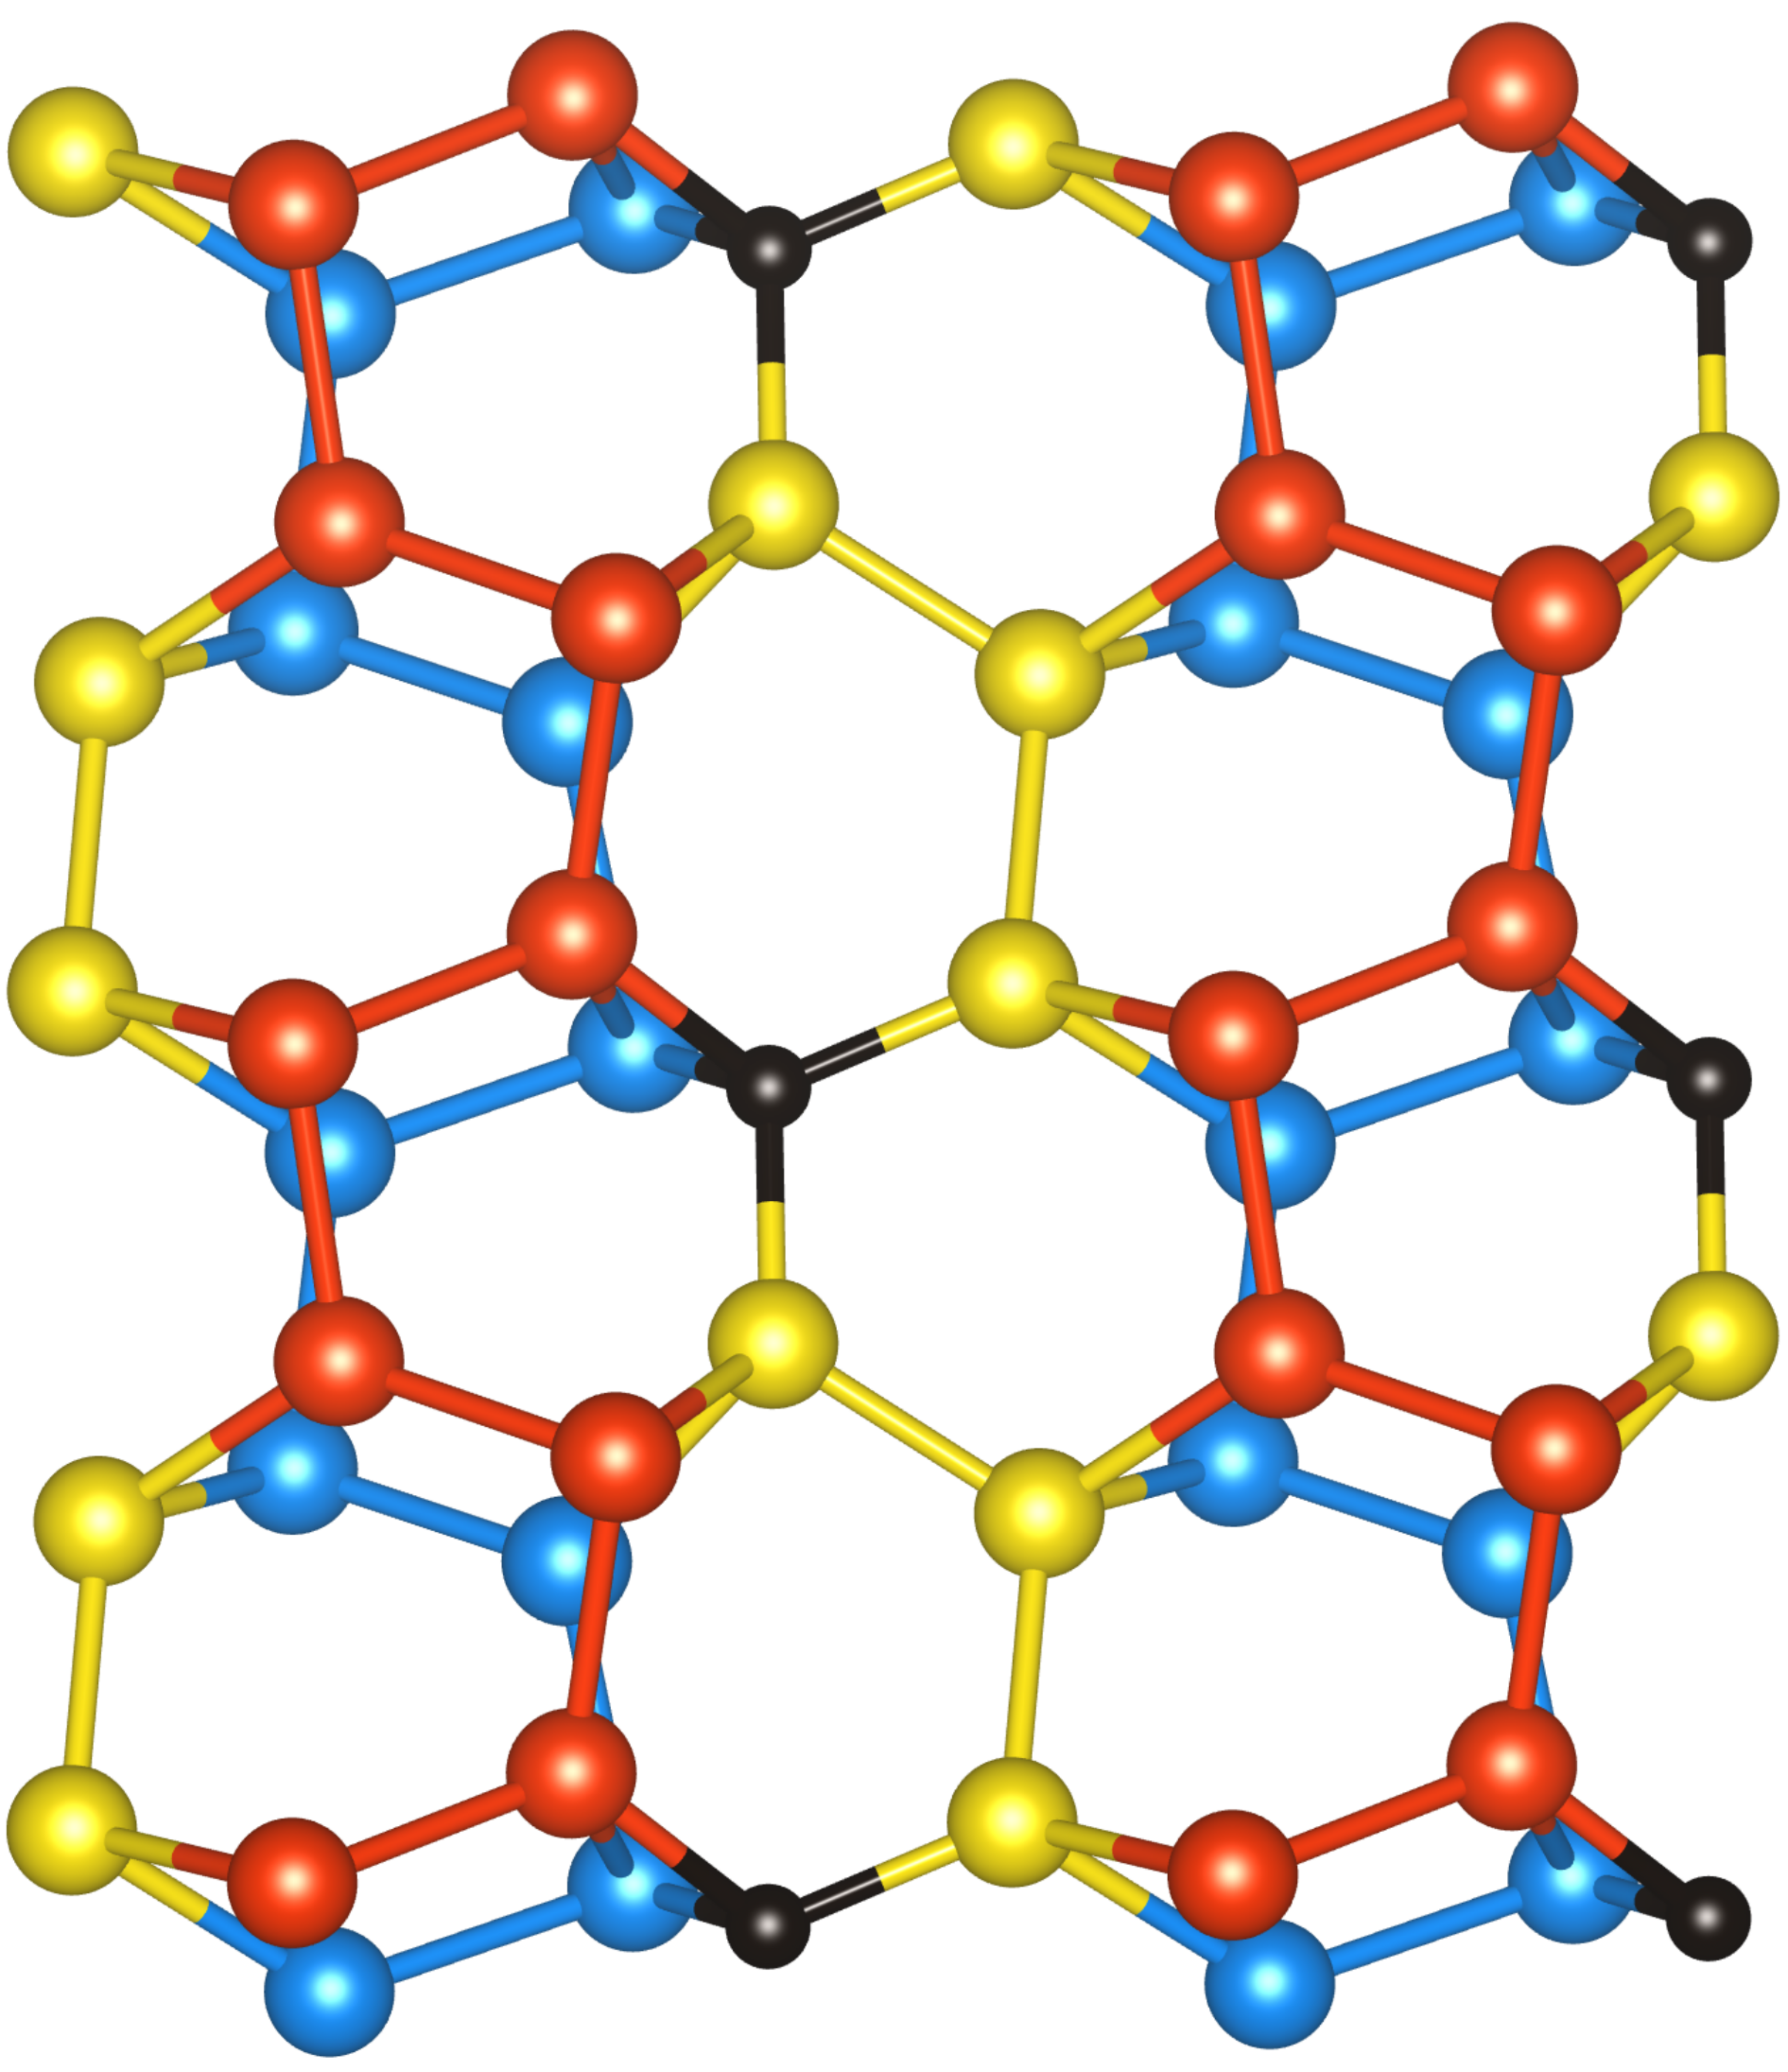

Supplement: c9cp06942a1.zip [file c9cp06942a1.zip]

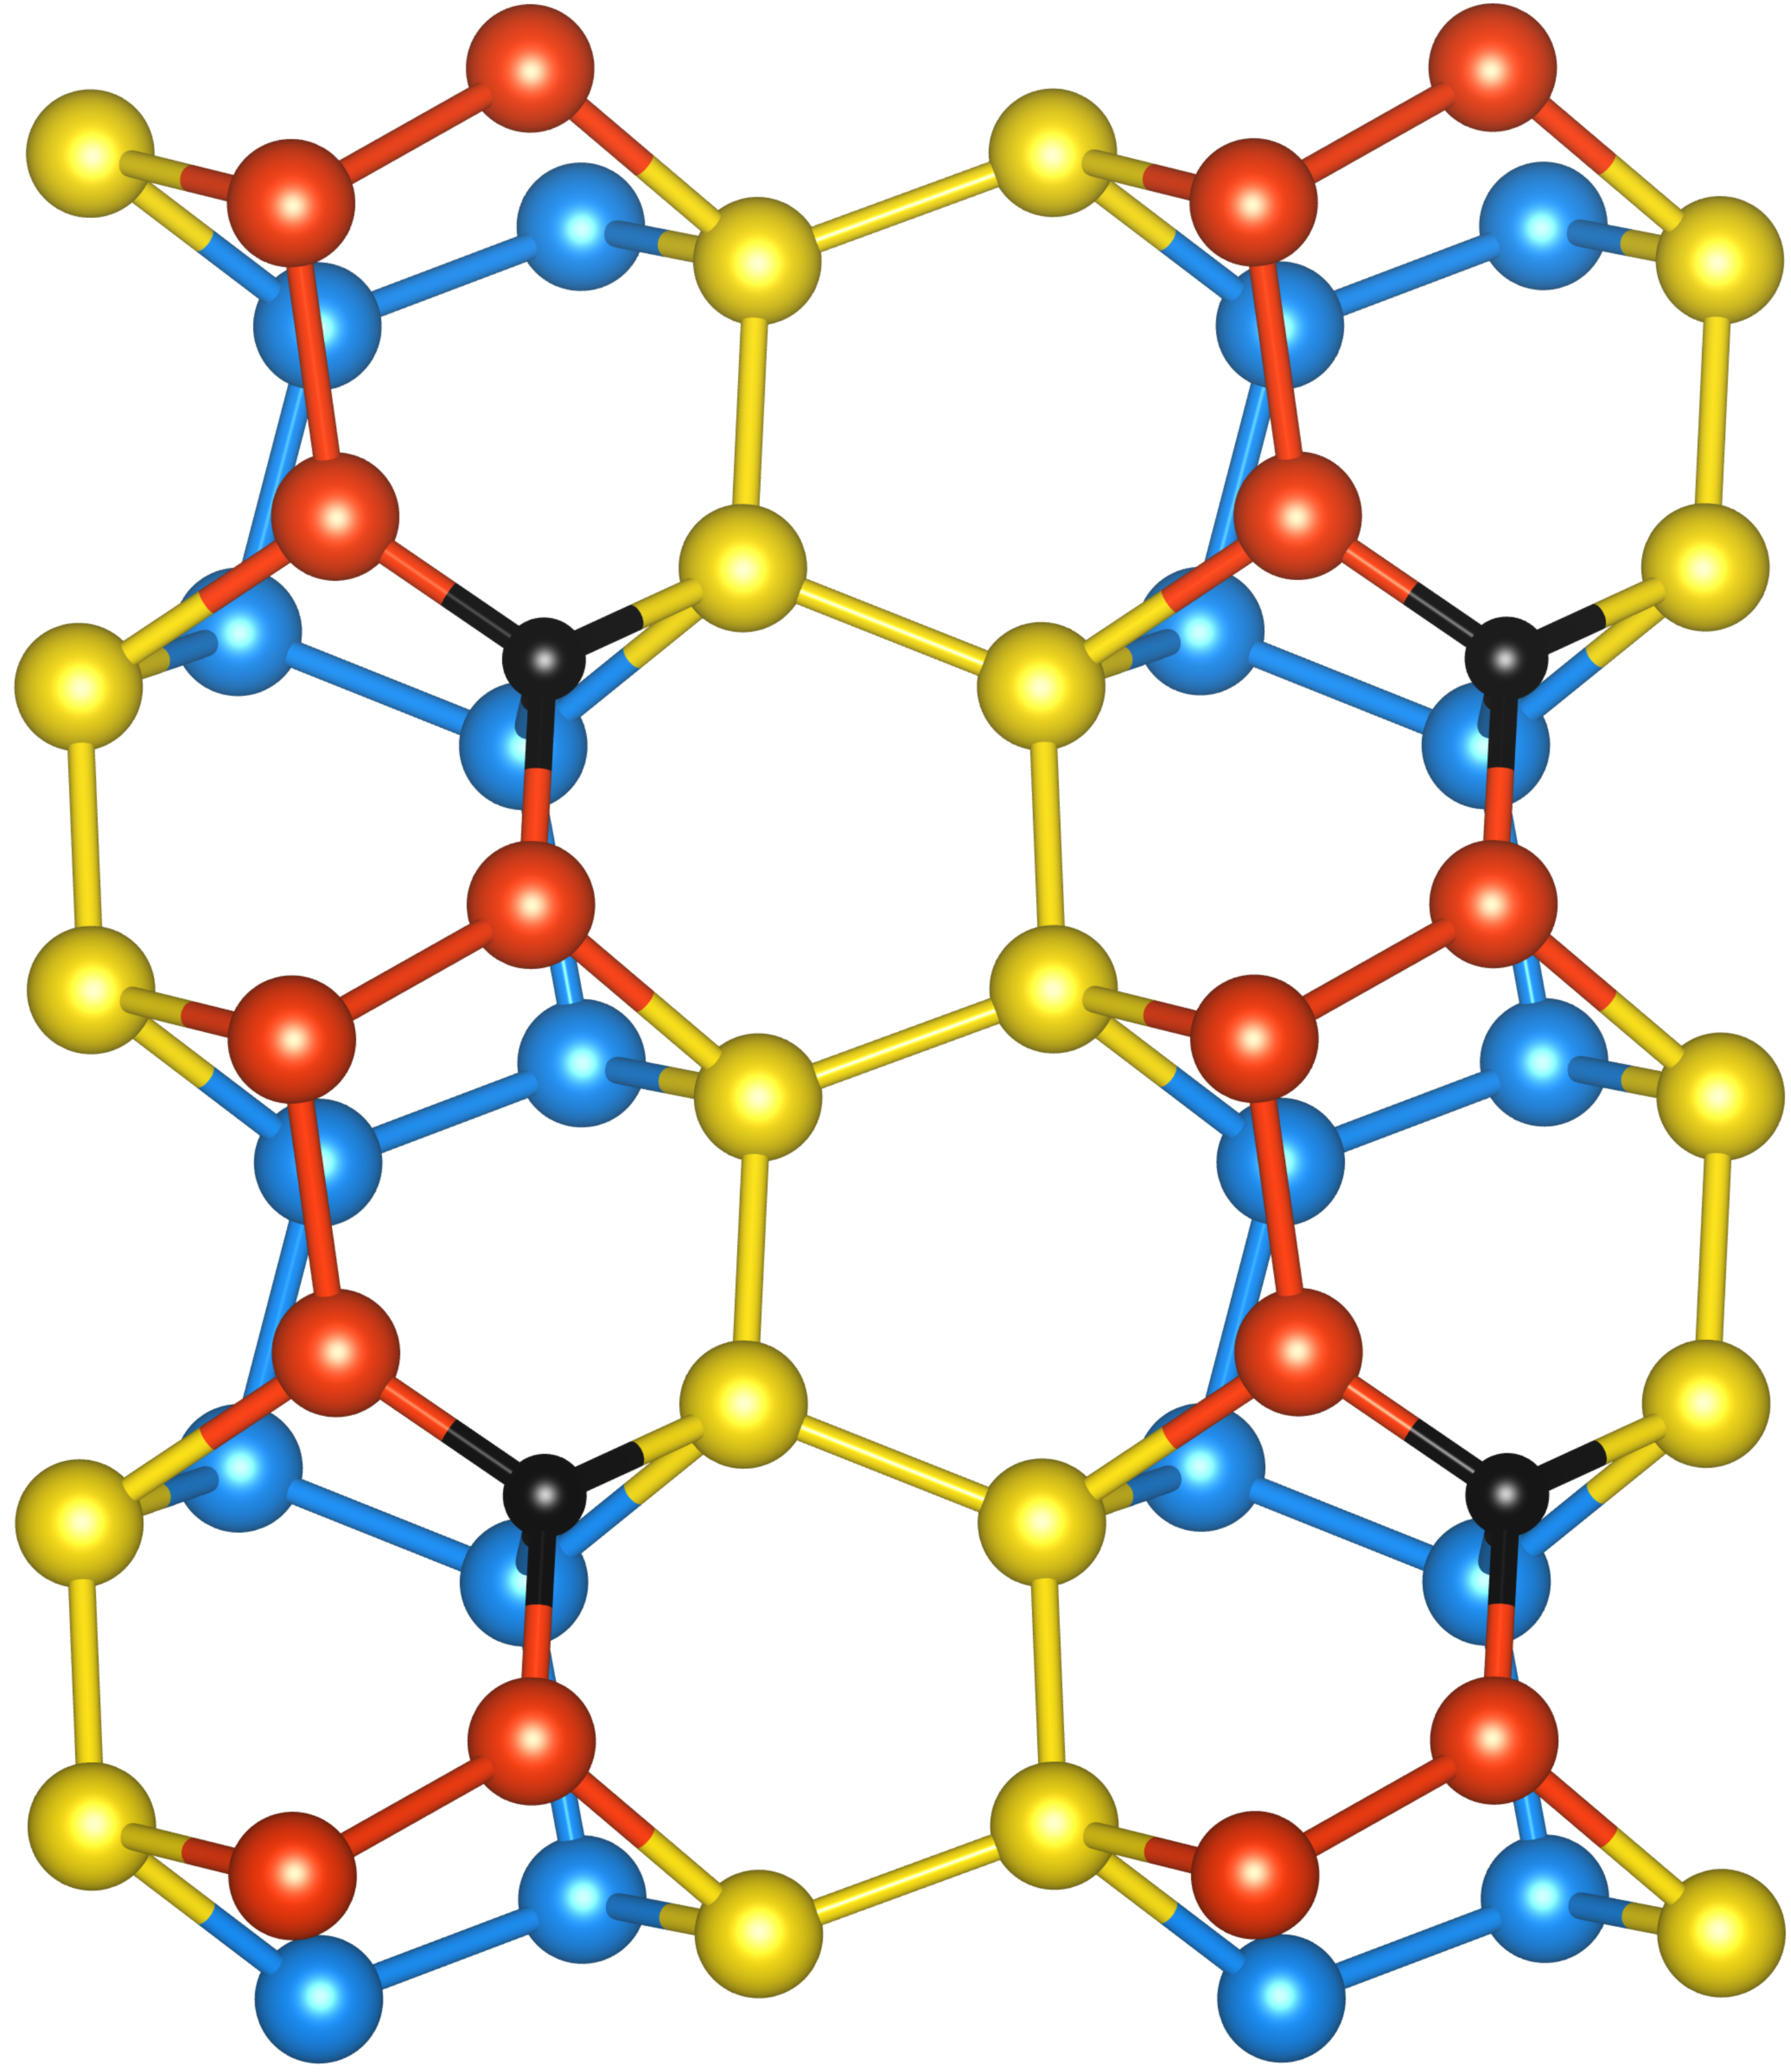

Supplement: c9cp06942a1.zip [file c9cp06942a1.zip]

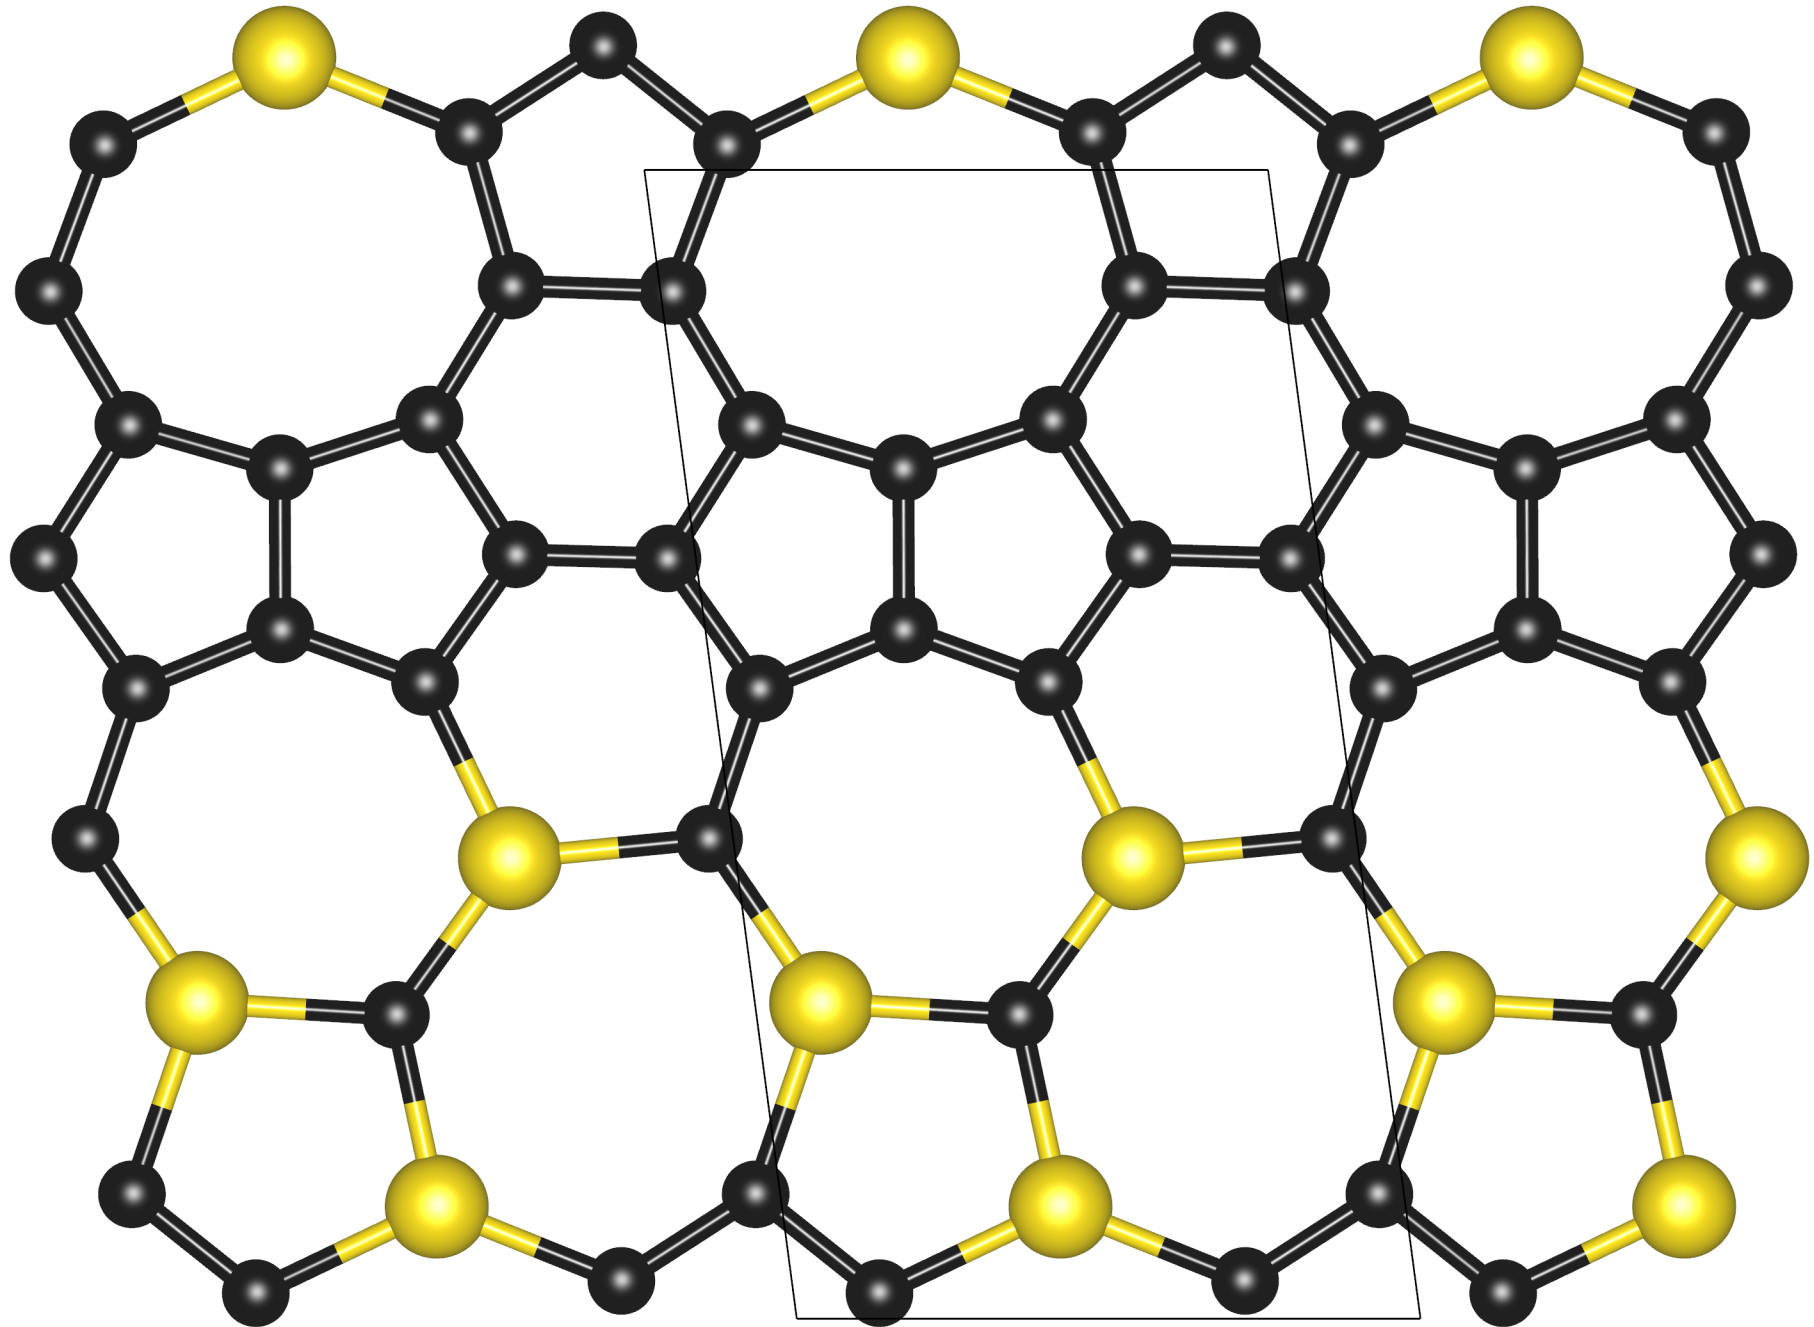

Supplement: c9cp06942a1.zip [file c9cp06942a1.zip]

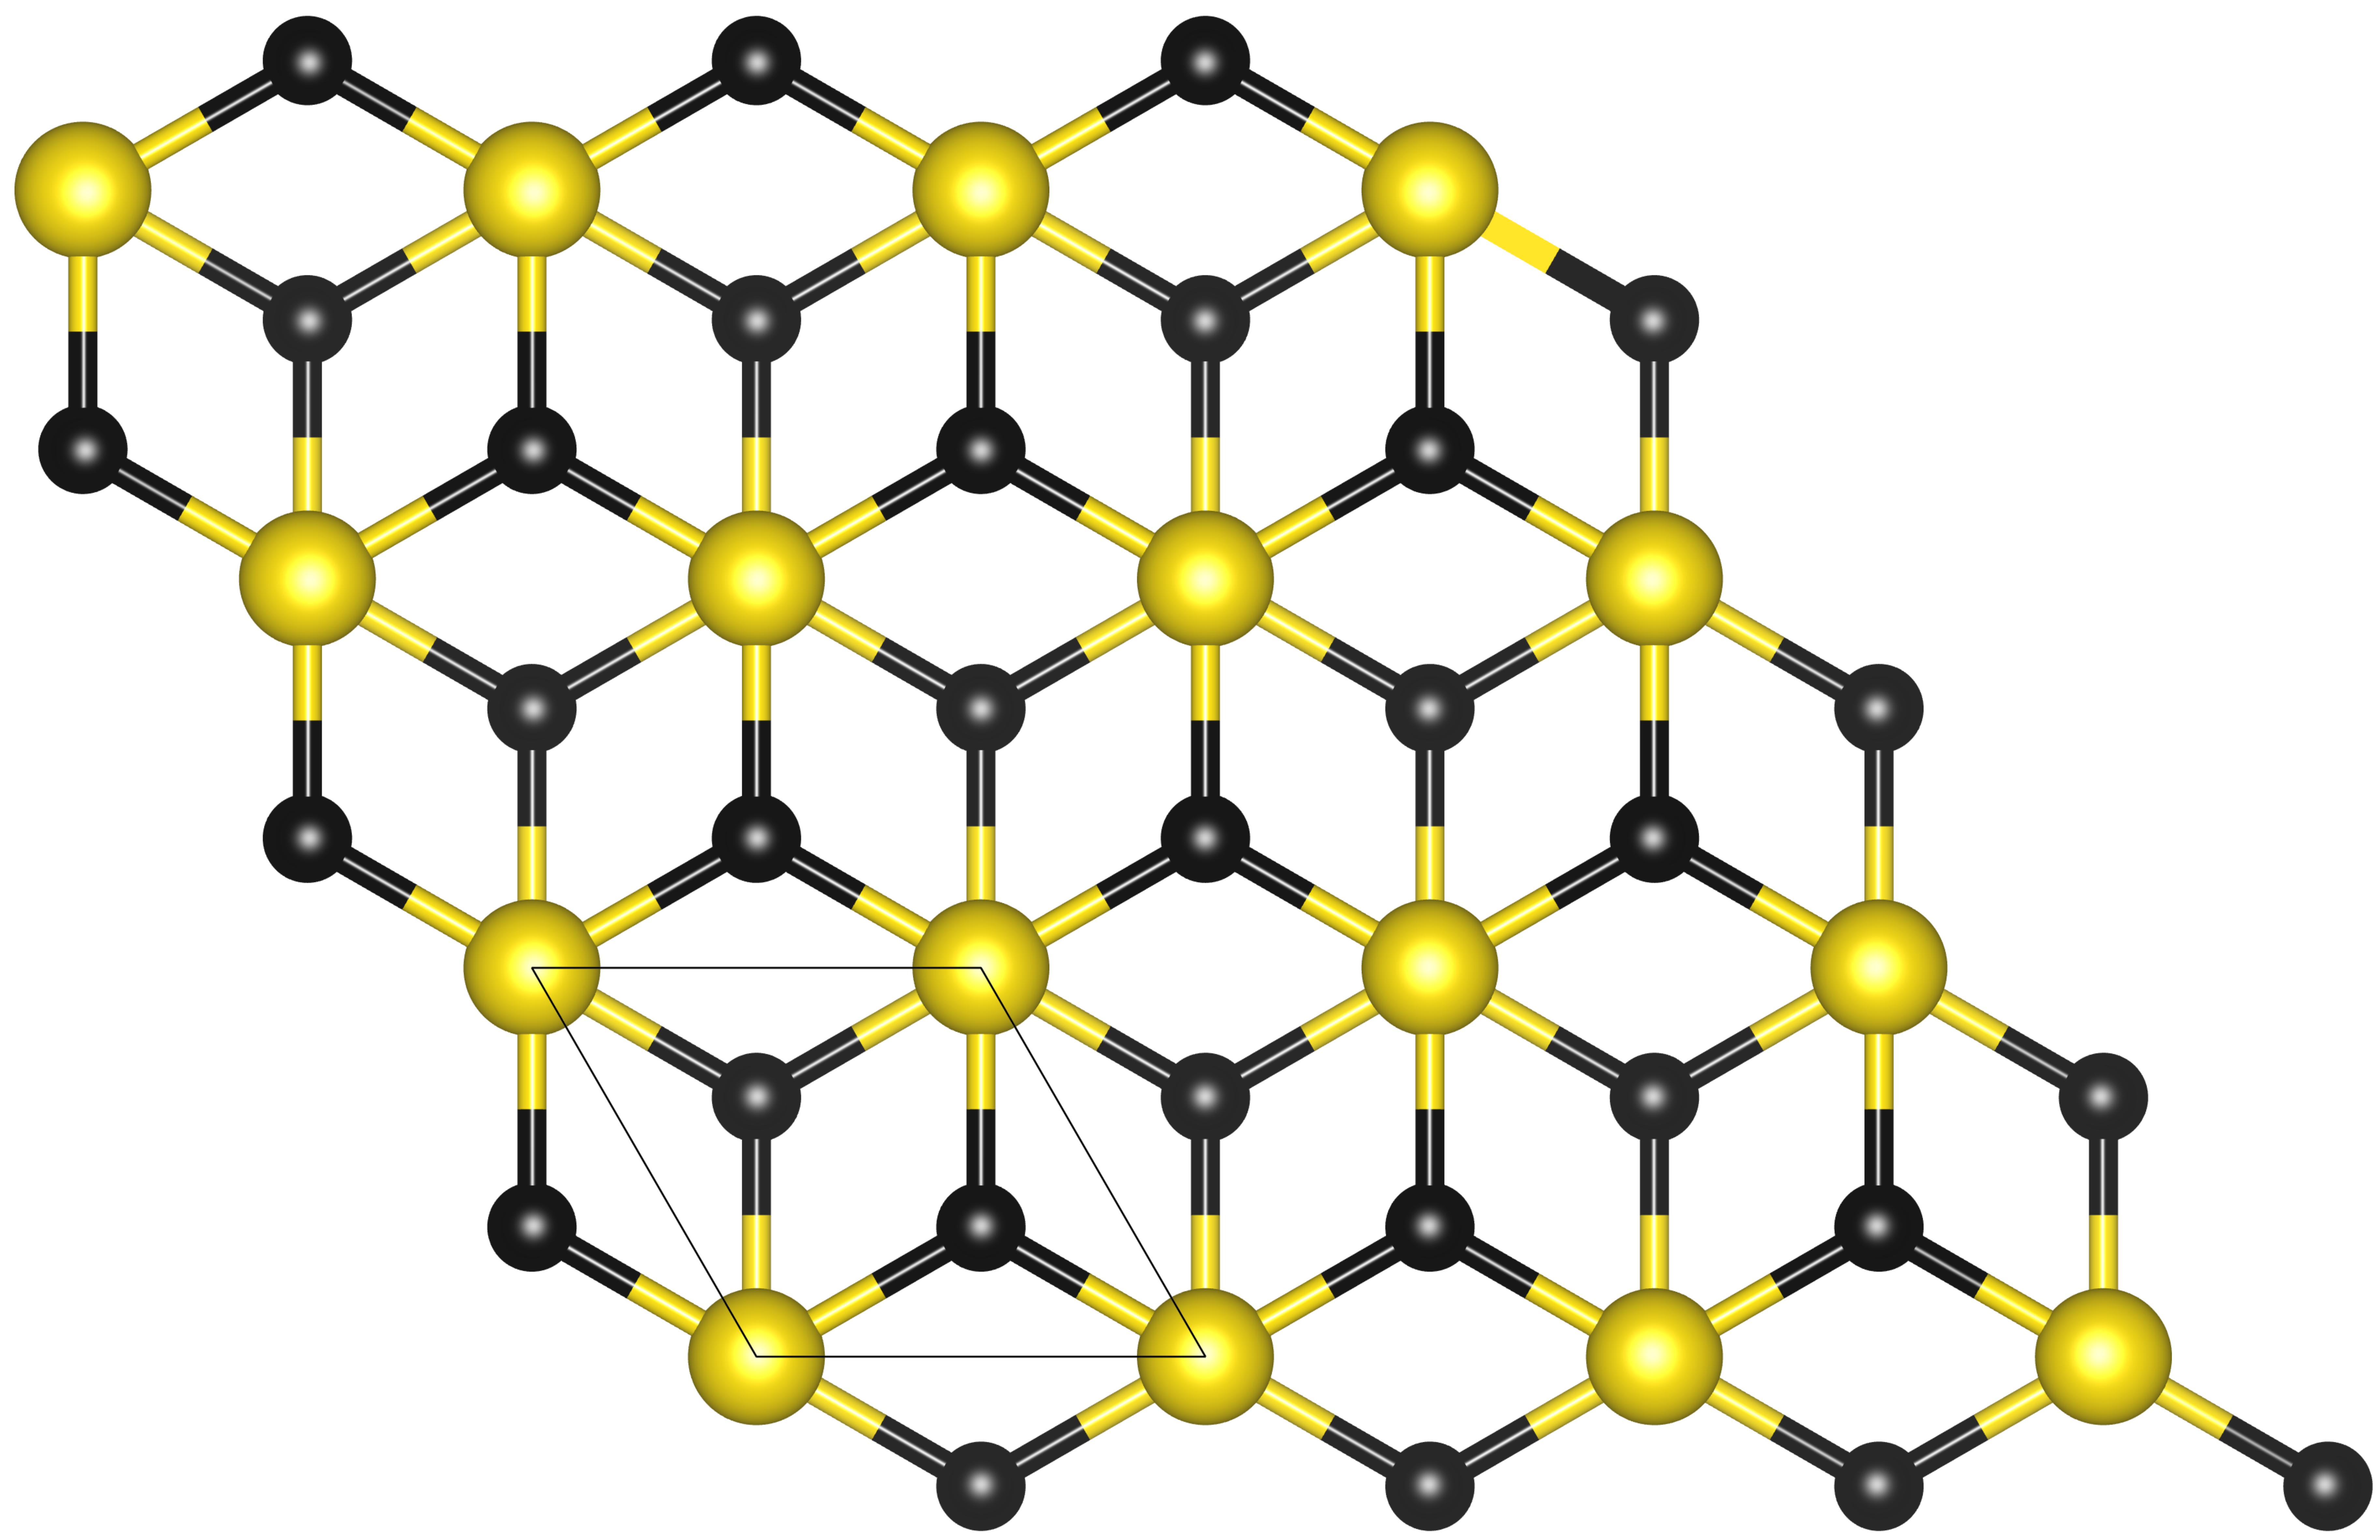

Supplement: c9cp06942a1.zip [file c9cp06942a1.zip]

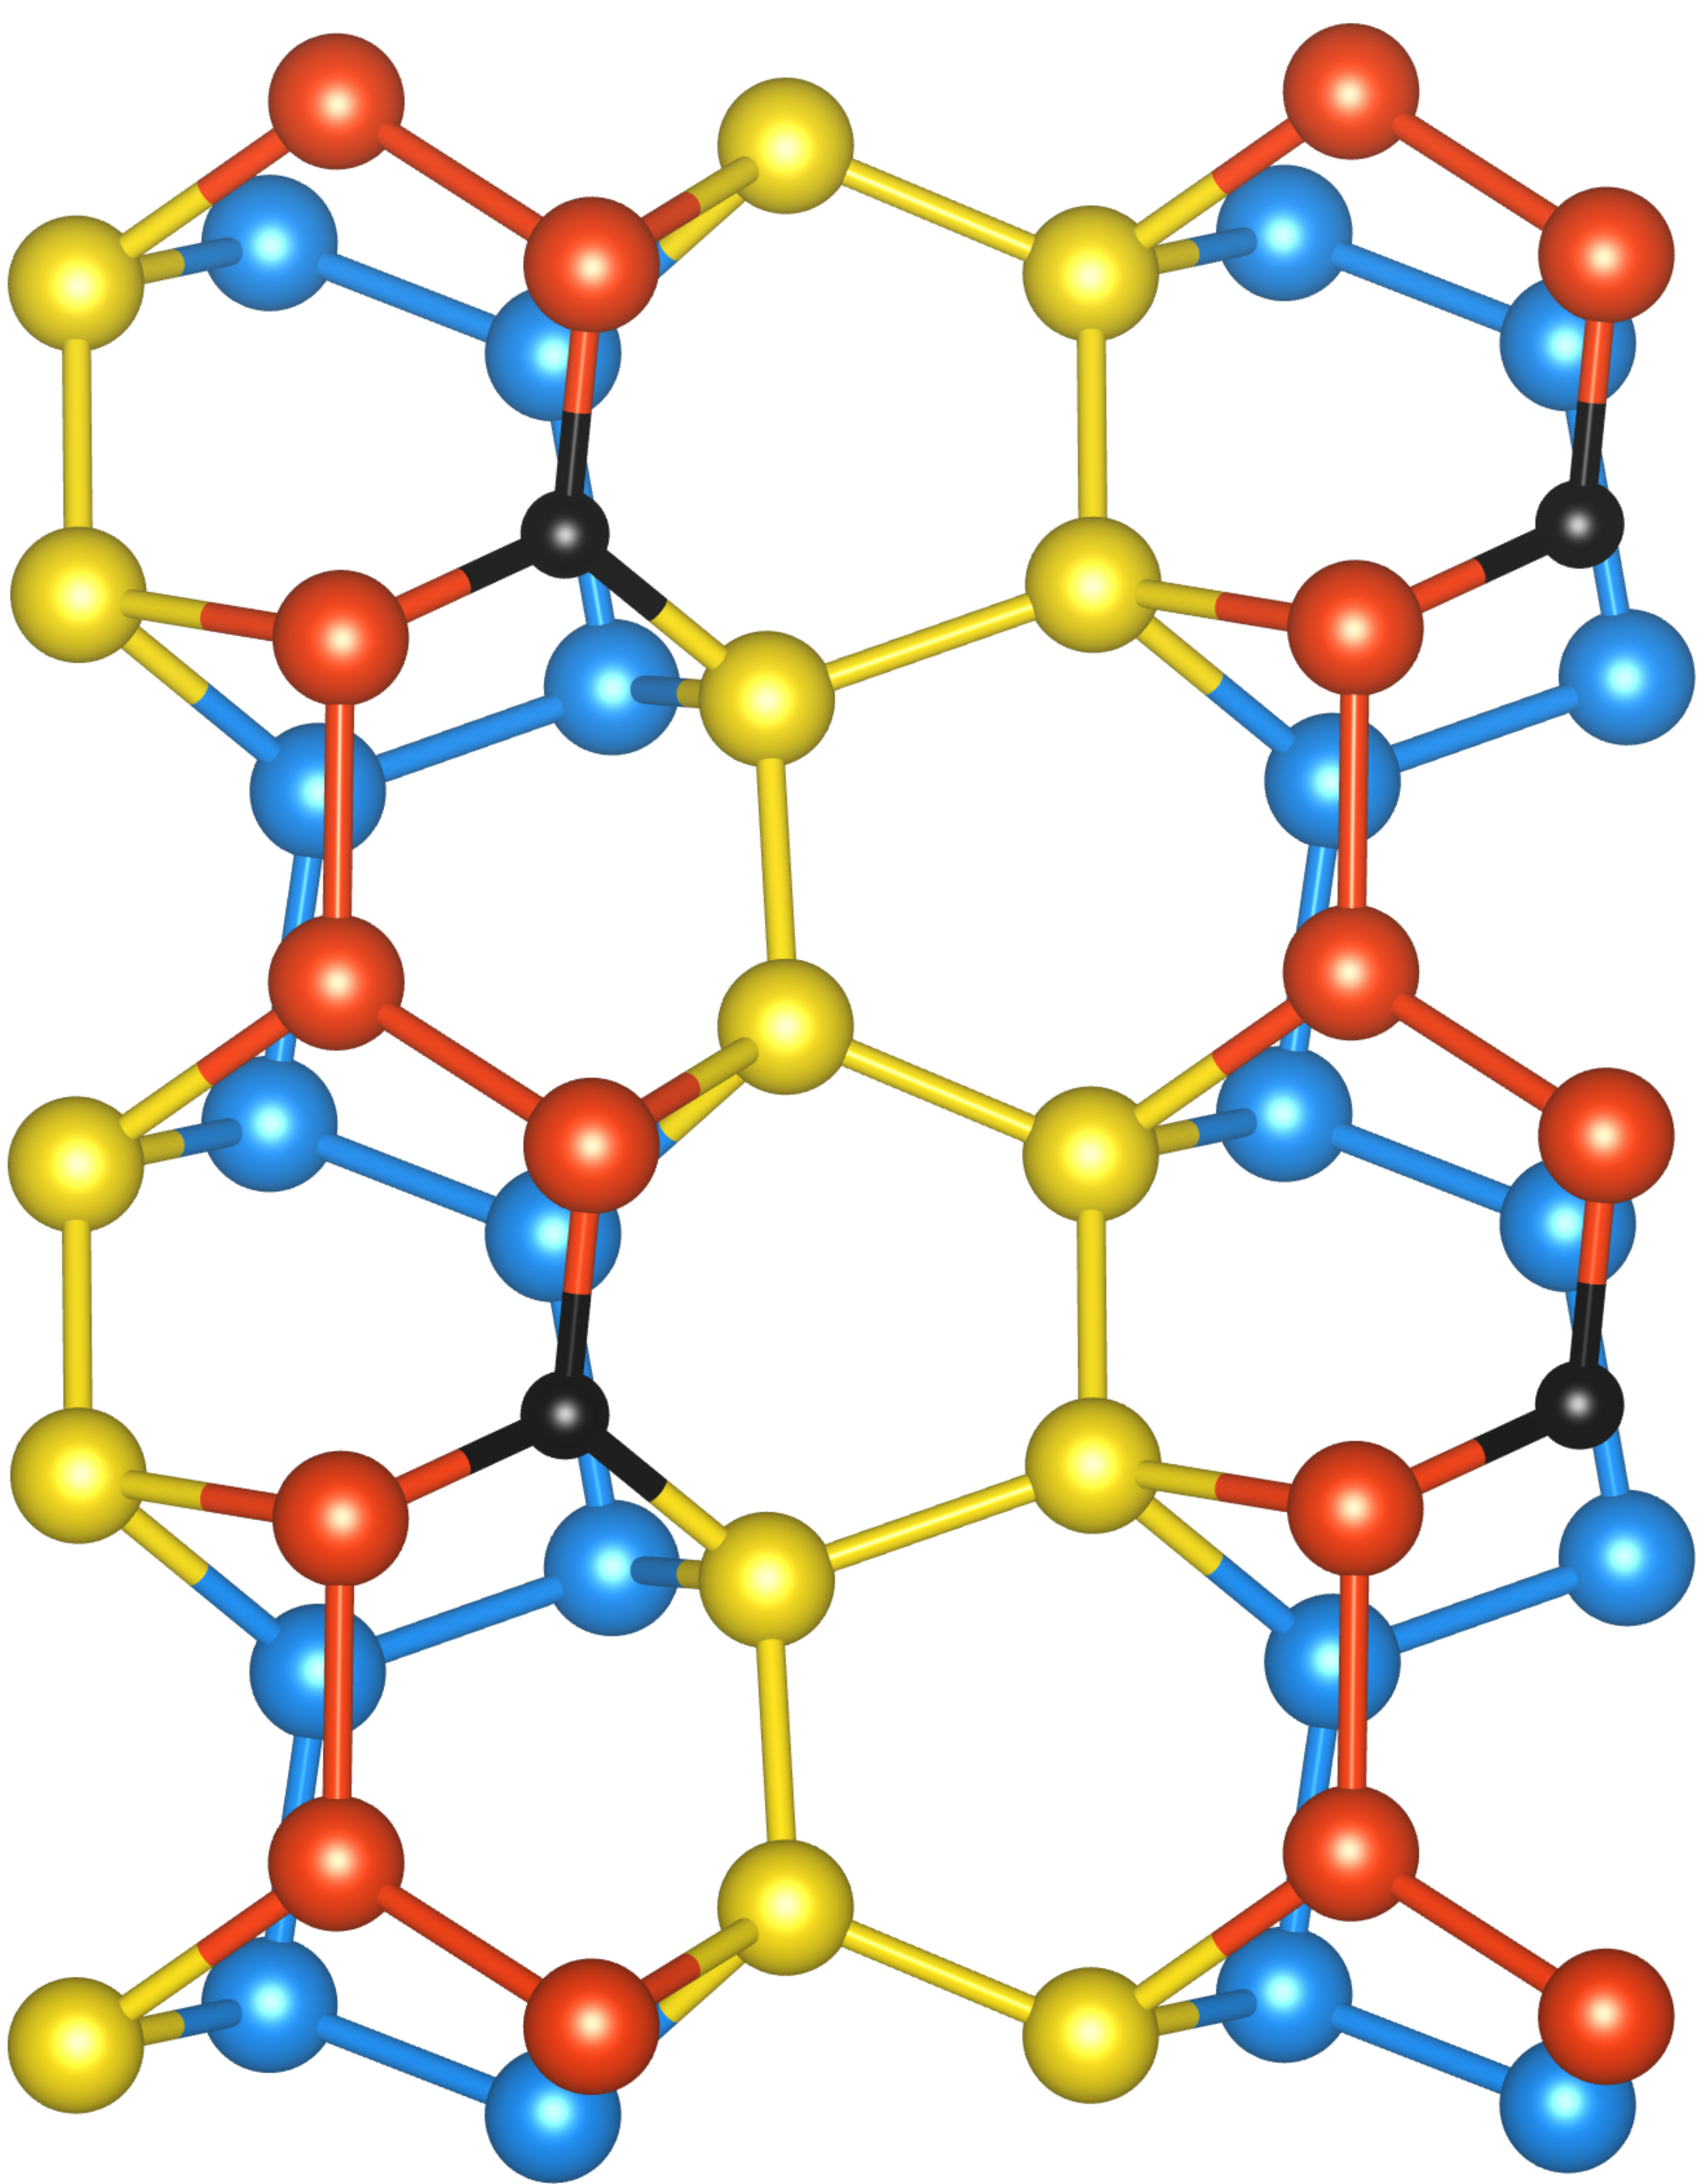

Supplement: c9cp06942a1.zip [file c9cp06942a1.zip]

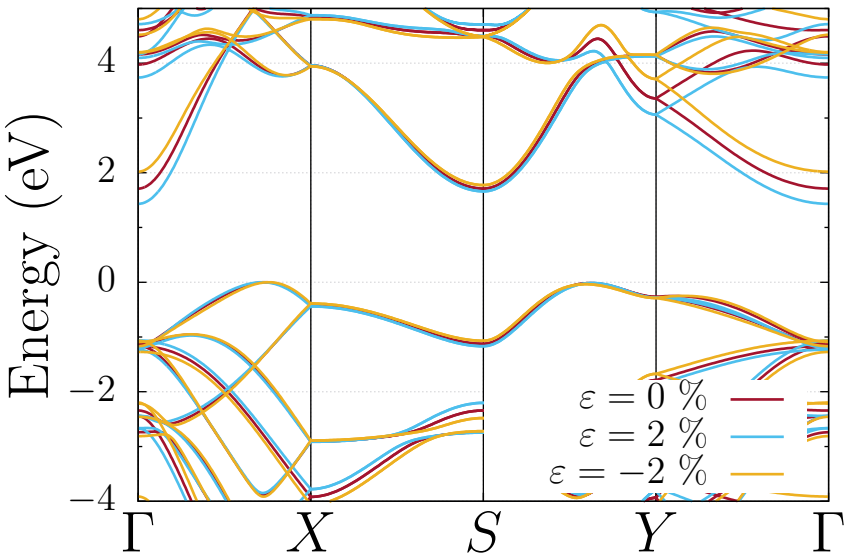

Supplement: c9cp06942a1.zip [file c9cp06942a1.zip]

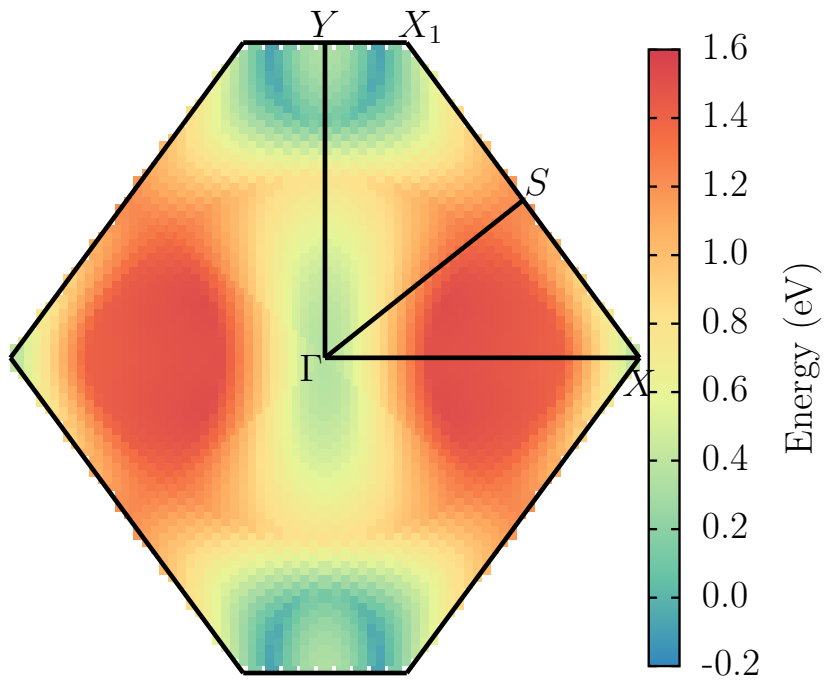

Supplement: c9cp06942a1.zip [file c9cp06942a1.zip]

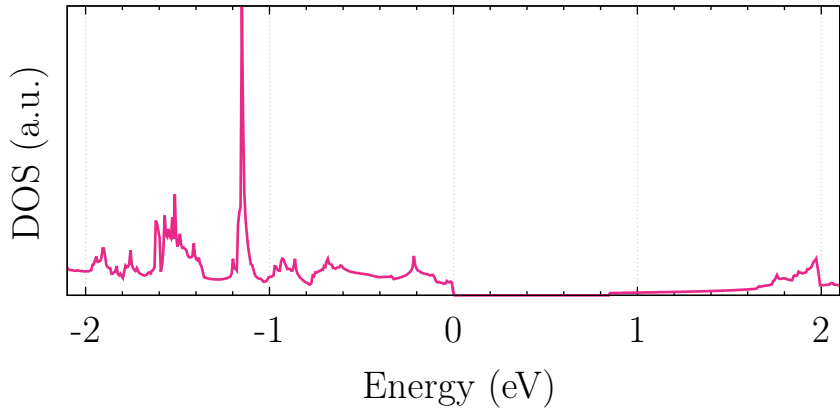

Supplement: c9cp06942a1.zip [file c9cp06942a1.zip]

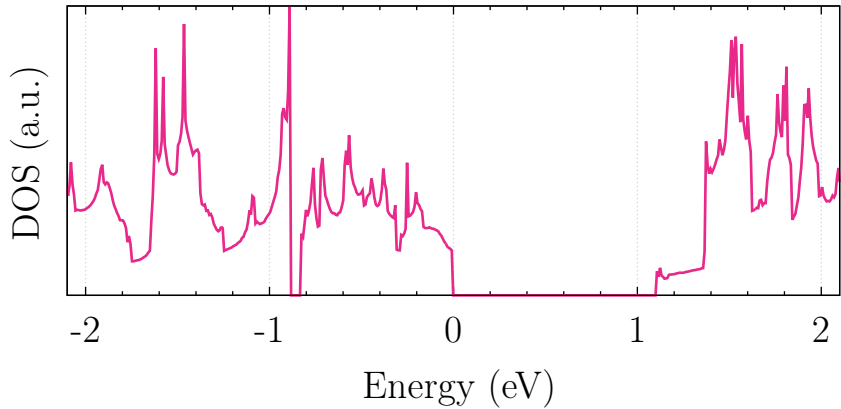

Supplement: c9cp06942a1.zip [file c9cp06942a1.zip]

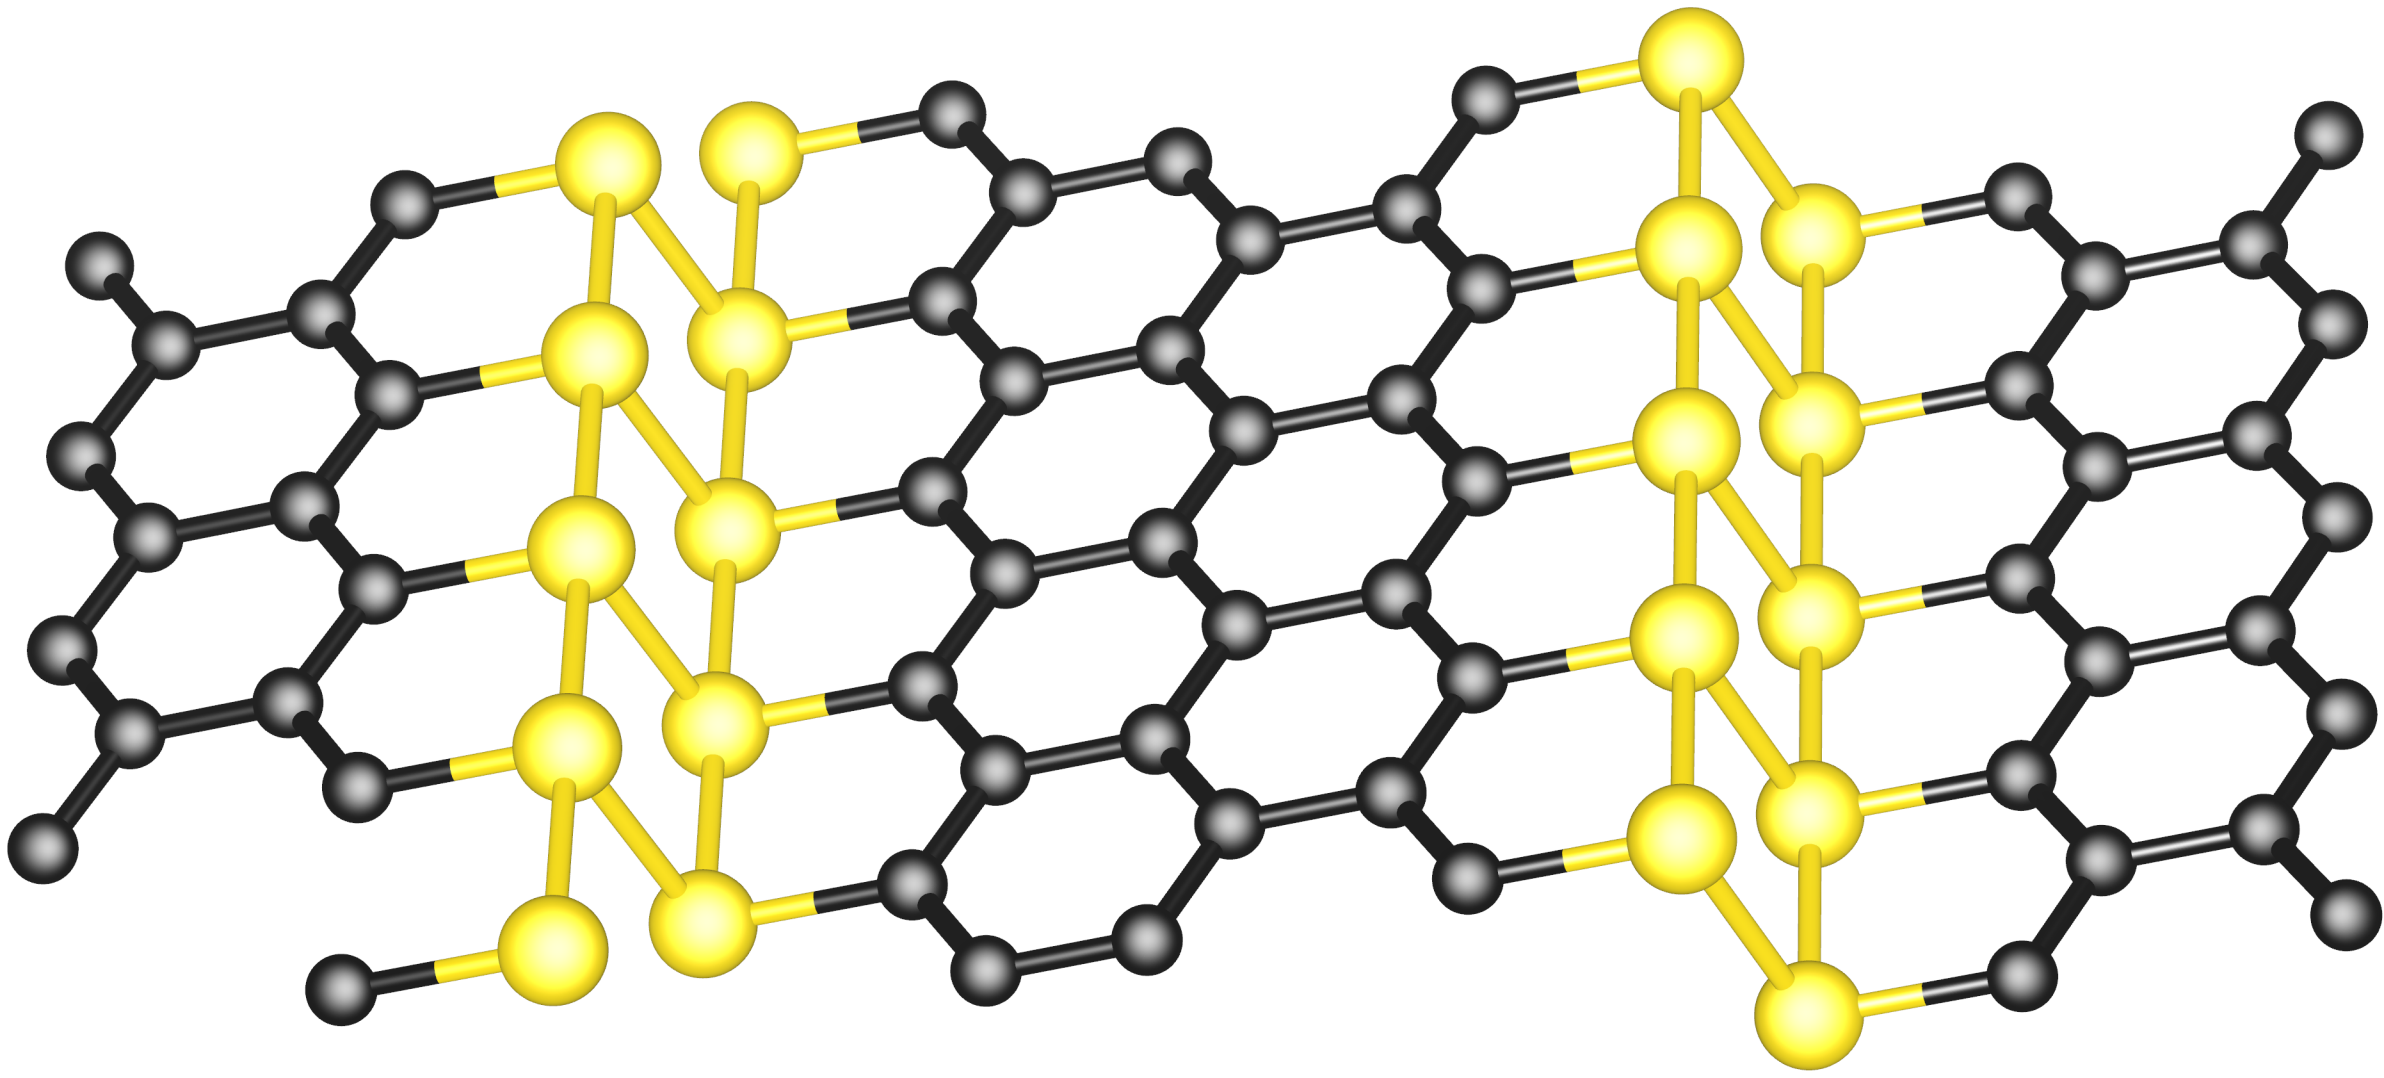

Supplement: c9cp06942a1.zip [file c9cp06942a1.zip]

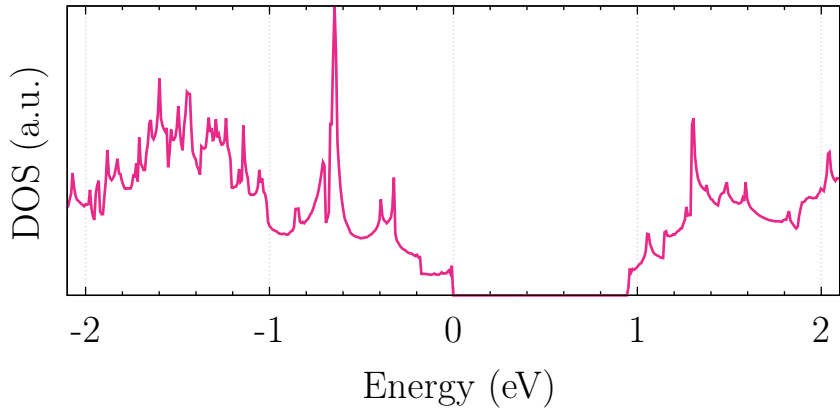

Supplement: c9cp06942a1.zip [file c9cp06942a1.zip]

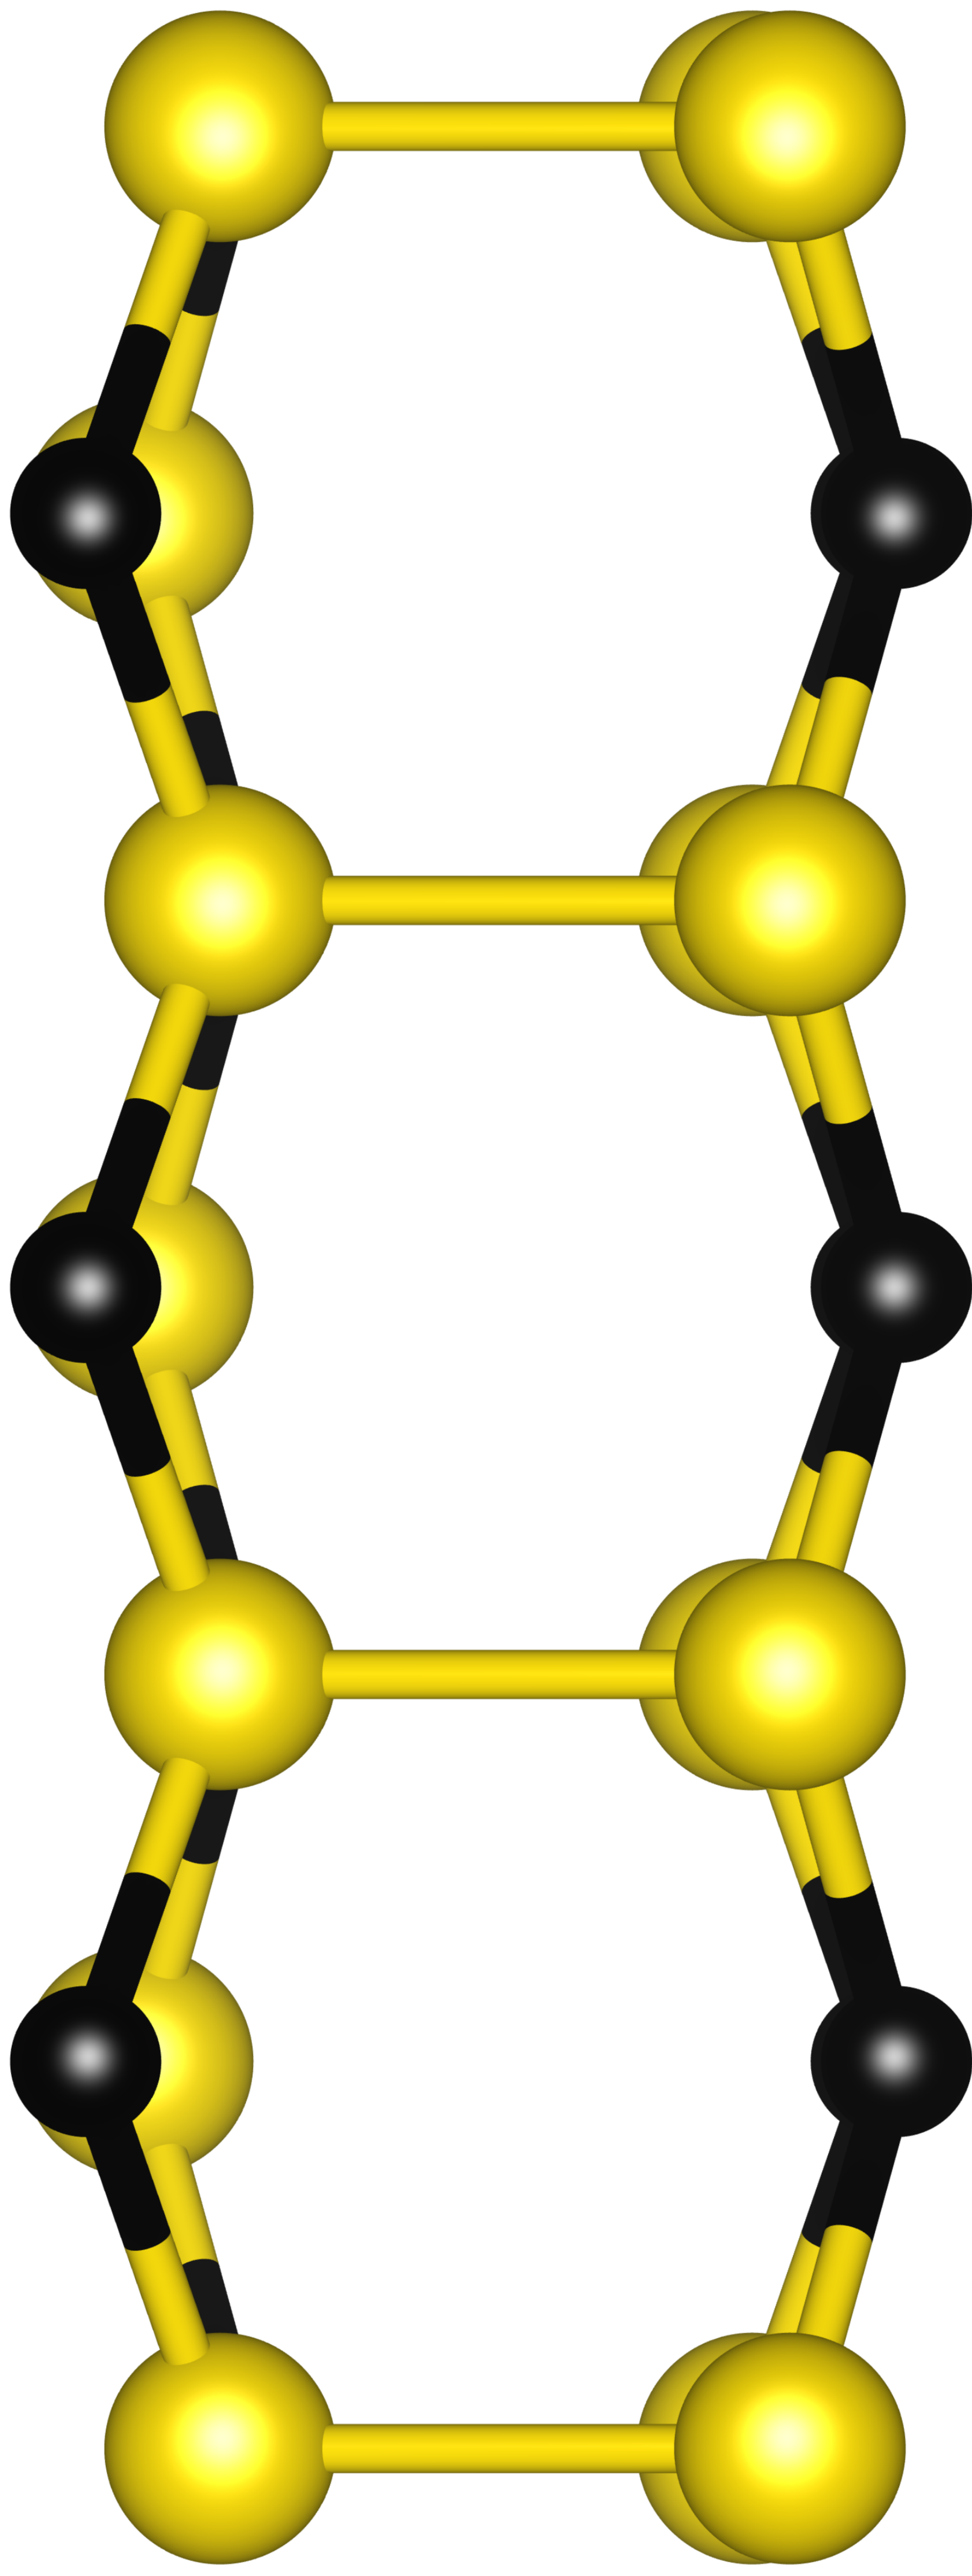

Supplement: c9cp06942a1.zip [file c9cp06942a1.zip]

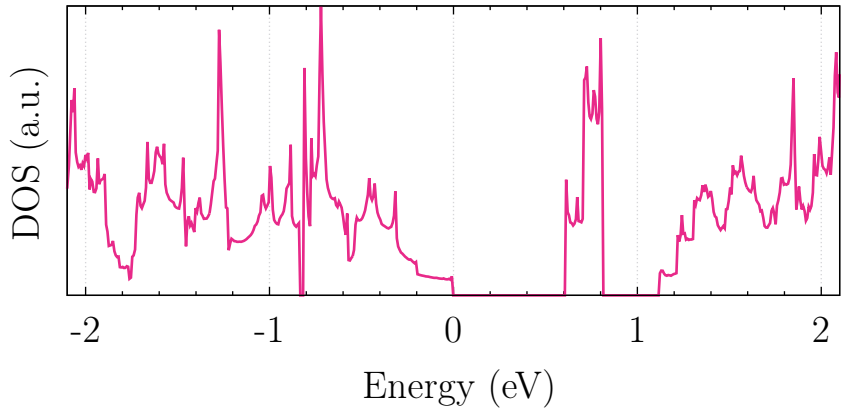

Supplement: c9cp06942a1.zip [file c9cp06942a1.zip]

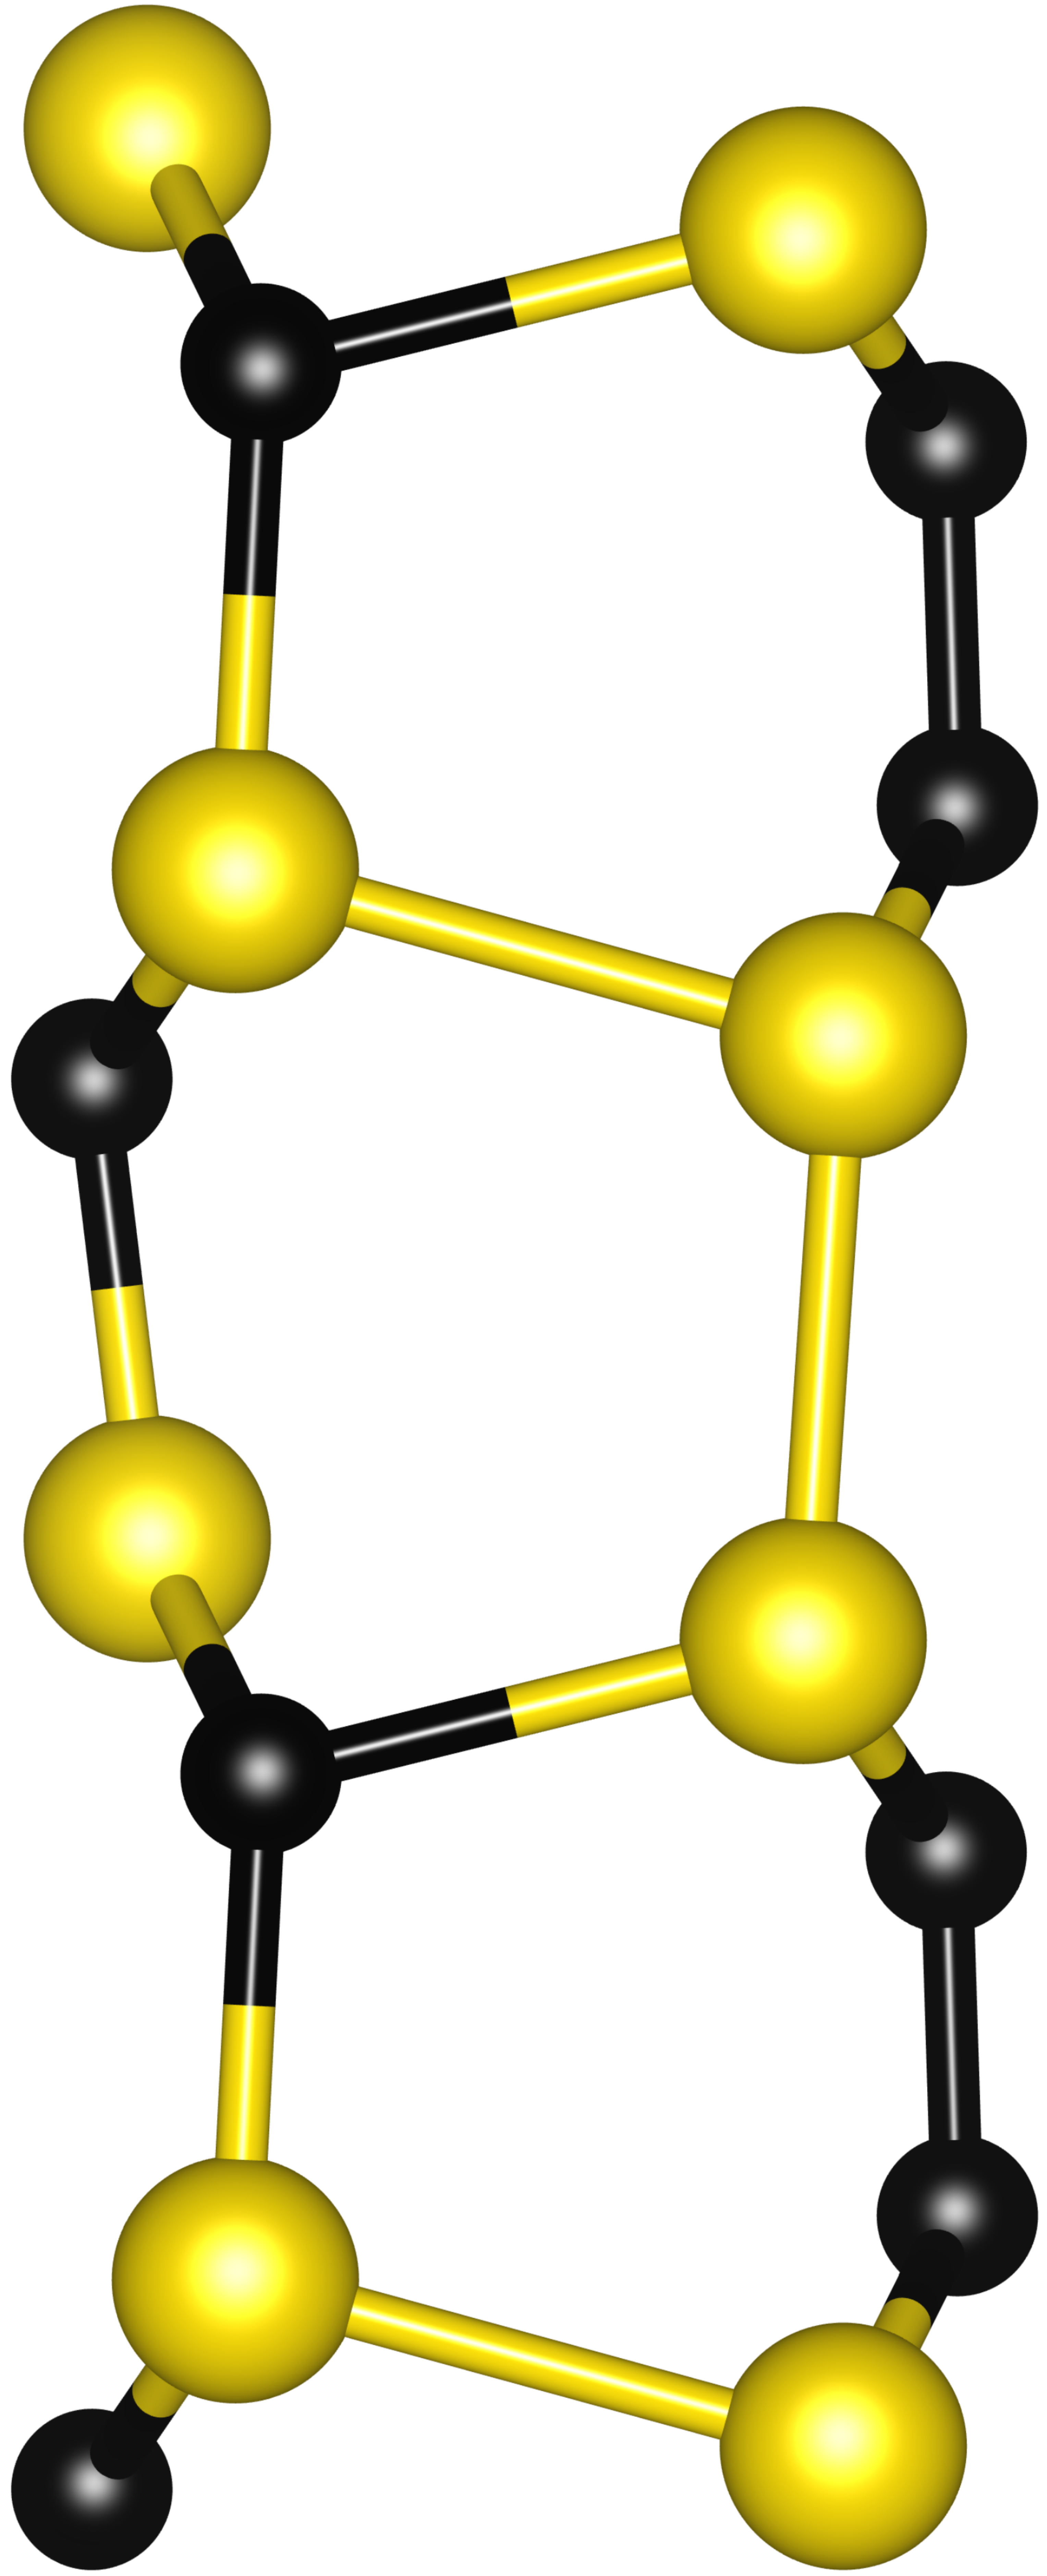

Supplement: c9cp06942a1.zip [file c9cp06942a1.zip]

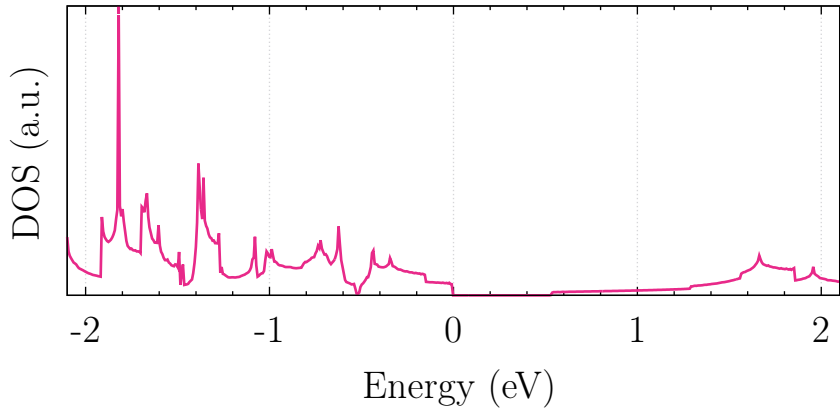

Supplement: c9cp06942a1.zip [file c9cp06942a1.zip]
